# Supplementary material for: Access to scientific literature by the conservation community
Source: PeerJ journal article supplement (doi:10.7717/peerj.9404), 2020-07-09
Supplement: Final_Survey_EN.pdf [file Final_Survey_EN.pdf]

## IUCN Access to Scientific Literature Survey

Thank you for responding to this survey, administered by the [IUCN HQ Library](#), about your access to the scientific literature.

The purpose of this survey is to understand the importance of access to scientific literature for the IUCN Secretariat, Commissions, and Membership, to guide the IUCN Science & Knowledge Unit – and specifically the IUCN HQ Library – in prioritising effort to better support you. To do this we need to understand your actual and needed levels and means of access to the scientific literature. Throughout the survey, we define the “scientific literature” as peer-reviewed scientific journals plus technical books.

The survey should take you about 5-7 minutes to complete, and is anonymous. You will have the opportunity to leave your contact information at the end, should you wish to do so.

1. To which component(s) of IUCN do you belong? Tick all that apply.

- IUCN State Member
- IUCN Government Agency Member
- IUCN International NGO Member
- IUCN National NGO Member
- IUCN Affiliate Member
- IUCN CEC member
- IUCN CEESP member
- IUCN CEM member
- IUCN SSC member
- IUCN WCEL member
- IUCN WCPA member
- IUCN Secretariat staff
- Other (please specify)

2. In which country/territory are you based?

3. Gender

- Female
- Male

\* 4. How frequently should you be consulting scientific literature to carry out your IUCN-related work?

| Never                 | Infrequently          | Sometimes (once a month) | Frequently (once a week) | Very frequently (daily) |
|-----------------------|-----------------------|--------------------------|--------------------------|-------------------------|
| <input type="radio"/> | <input type="radio"/> | <input type="radio"/>    | <input type="radio"/>    | <input type="radio"/>   |

## IUCN Access to Scientific Literature Survey

\* 5. How easy is it for you currently to obtain the scientific literature you need to carry out your IUCN-related work?

| Not at all easy       | Not easy              | Easy                  | Very easy             |
|-----------------------|-----------------------|-----------------------|-----------------------|
| <input type="radio"/> | <input type="radio"/> | <input type="radio"/> | <input type="radio"/> |

Please explain (if necessary).

\* 6. How important is it for your IUCN-related work to have easy access to scientific literature?

| Not at all important  | Somewhat important    | Very important        | Essential             |
|-----------------------|-----------------------|-----------------------|-----------------------|
| <input type="radio"/> | <input type="radio"/> | <input type="radio"/> | <input type="radio"/> |

Feel free to explain further.

7. Which one scientific journal would have the largest impact on your IUCN-related work if you could obtain easy access to it?

8. In what format do you prefer to read scientific literature?

|                  | I prefer reading on a screen | I prefer printing out to read | I prefer the original hard copy |
|------------------|------------------------------|-------------------------------|---------------------------------|
| Journal articles | <input type="radio"/>        | <input type="radio"/>         | <input type="radio"/>           |
| Books            | <input type="radio"/>        | <input type="radio"/>         | <input type="radio"/>           |

Other (please specify)

\* 9. Do you have institutional access to scientific literature online (e.g. through affiliation with a university or other organization)?

- Yes  
 No

\* 10. How frequently do you use the following means to access scientific literature for your IUCN-related work?

|                                                                                                                                   | Never or not available | Infrequently          | Sometimes (once a month) | Frequently (once a week) | Very frequently (daily) |
|-----------------------------------------------------------------------------------------------------------------------------------|------------------------|-----------------------|--------------------------|--------------------------|-------------------------|
| I use the library of my own institution.                                                                                          | <input type="radio"/>  | <input type="radio"/> | <input type="radio"/>    | <input type="radio"/>    | <input type="radio"/>   |
| I visit a local library (public, academic, etc.) to read scientific literature in print.                                          | <input type="radio"/>  | <input type="radio"/> | <input type="radio"/>    | <input type="radio"/>    | <input type="radio"/>   |
| I use my institutional access to scientific literature online (e.g. through affiliation with a university or other organization). | <input type="radio"/>  | <input type="radio"/> | <input type="radio"/>    | <input type="radio"/>    | <input type="radio"/>   |
| I request journal articles from the IUCN Librarian.                                                                               | <input type="radio"/>  | <input type="radio"/> | <input type="radio"/>    | <input type="radio"/>    | <input type="radio"/>   |
| I request journal articles from the author.                                                                                       | <input type="radio"/>  | <input type="radio"/> | <input type="radio"/>    | <input type="radio"/>    | <input type="radio"/>   |
| I access scientific literature through my own personal subscription to individual journals.                                       | <input type="radio"/>  | <input type="radio"/> | <input type="radio"/>    | <input type="radio"/>    | <input type="radio"/>   |
| I ask a friend or colleague whom I know has access to scientific literature online.                                               | <input type="radio"/>  | <input type="radio"/> | <input type="radio"/>    | <input type="radio"/>    | <input type="radio"/>   |
| I access whatever I can find online for free (via Google Scholar, open-access journals, ResearchGate, etc.)                       | <input type="radio"/>  | <input type="radio"/> | <input type="radio"/>    | <input type="radio"/>    | <input type="radio"/>   |

## IUCN Access to Scientific Literature Survey

11. If you had institutional access to scientific literature online, how often would you use this for your IUCN-related work?

| Never                 | Infrequently          | Sometimes (once a month) | Frequently (once a week) | Very frequently (daily) |
|-----------------------|-----------------------|--------------------------|--------------------------|-------------------------|
| <input type="radio"/> | <input type="radio"/> | <input type="radio"/>    | <input type="radio"/>    | <input type="radio"/>   |

\* 12. What effect would institutional access to scientific literature online have on the quality of your IUCN-related work?

| No effect at all      | Slight positive effect | Moderate positive effect | Great positive effect |
|-----------------------|------------------------|--------------------------|-----------------------|
| <input type="radio"/> | <input type="radio"/>  | <input type="radio"/>    | <input type="radio"/> |

Feel free to explain further.

\* 13. What impact does lack of institutional access to scientific literature online have on your IUCN-related work?

| No impact at all      | Slight negative impact | Moderate negative impact | Great negative impact |
|-----------------------|------------------------|--------------------------|-----------------------|
| <input type="radio"/> | <input type="radio"/>  | <input type="radio"/>    | <input type="radio"/> |

Feel free to explain further.

14. Do you have any other comments, questions, or concerns?

15. If you don't mind being contacted in the future (e.g. to further elaborate on your answers or to participate in a focus group), please leave your contact information below.

**Name**

**Email Address**
