# Supplementary material for: Access to scientific literature by the conservation community
Source: PubMed Central journal article supplement (PMC7354838; doi:10.7717/peerj.9404), 2020-07-09
Supplement: peerj-08-9404-s002.pdf [file peerj-08-9404-s002.pdf]

## Encuesta UICN sobre el acceso a la literatura científica

Gracias de antemano por responder a esta encuesta, gestionada por la [Biblioteca de la sede de la UICN](#), sobre su acceso a la literatura científica.

El propósito de este estudio es comprender la importancia del acceso a literatura científica para la Secretaría, las Comisiones y los Miembros de la UICN, para guiar a la Unidad de Ciencia y Conocimiento de la UICN (Science and Knowledge Unit) -- y, específicamente, a la Biblioteca de la sede de la UICN -- en vistas a mejorar nuestro apoyo en este tema. Para ello necesitamos averiguar cuál es el nivel y forma de acceder a la literatura científica que precisan. A lo largo de esta encuesta, definimos "literatura científica" como las revistas científicas revisadas por pares, además de libros técnicos.

La encuesta dura aproximadamente 5-7 minutos y es anónima. Tendrá la oportunidad de dejar su información de contacto al final, en caso de que desee hacerlo.

1. ¿A cuál de los componentes de la UICN pertenece usted? Marque todo lo que corresponda.

- Estado Miembro
- Agencia gubernamental Miembro
- ONG internacional Miembro
- ONG nacional Miembro
- Miembro afiliado
- Miembro de la CEC
- Miembro de la CPAES
- Miembro de la CGE
- Miembro de la CSE
- Miembro de la CDA
- Miembro de la CMAP
- Personal de la Secretaría de la UICN
- Otros (especificar)

2. ¿En qué país / territorio está usted ubicado?

3. Género

- Femenino
- Masculino

\* 4. ¿Con qué frecuencia debe consultar literatura científica para llevar a cabo su trabajo relacionado con la UICN?

| Nunca                 | Raramente             | A veces (una vez al mes) | A menudo (una vez a la semana) | Muy frecuentemente (a diario) |
|-----------------------|-----------------------|--------------------------|--------------------------------|-------------------------------|
| <input type="radio"/> | <input type="radio"/> | <input type="radio"/>    | <input type="radio"/>          | <input type="radio"/>         |

\* 5. ¿Cuán fácil es para usted obtener la literatura científica que necesita para llevar a cabo su trabajo relacionado con la UICN?

No es nada fácil

No es fácil

Fácil

Muy fácil

Por favor, explique su respuesta (si lo considera necesario).

\* 6. ¿Qué importancia tiene el acceder fácilmente la literatura científica para su trabajo con la UICN?

Nada importante

Algo importante

Muy importante

Esencial

Explique su respuesta si lo desea.

7. En general, ¿con qué frecuencia el empleado termina su trabajo en las fechas programadas de entrega?

- Casi siempre
- Frecuentemente
- A veces
- Rara vez
- Casi nunca

8. ¿En qué formato prefiere leer literatura científica?

|                                   | Prefiero leer en una pantalla | Prefiero imprimir para leer | Prefiero el original impreso |
|-----------------------------------|-------------------------------|-----------------------------|------------------------------|
| Artículos en revistas científicas | <input type="radio"/>         | <input type="radio"/>       | <input type="radio"/>        |
| Libros                            | <input type="radio"/>         | <input type="radio"/>       | <input type="radio"/>        |

Otros (por favor especifique)

\* 9. ¿Tiene usted acceso institucional a literatura científica en línea (por ejemplo a través de su afiliación a una universidad u otra organización)?

- Si
- No

\* 10. ¿Con qué frecuencia utiliza usted los siguientes medios para tener acceso a la literatura científica en su trabajo relacionado con la UICN?

|                                                                                                                                                              | Nunca o no disponible | Con poca frecuencia   | A veces (una vez al mes) | A menudo (una vez a la semana) | Muy frecuentemente (a diario) |
|--------------------------------------------------------------------------------------------------------------------------------------------------------------|-----------------------|-----------------------|--------------------------|--------------------------------|-------------------------------|
| Utilizo la biblioteca de mi propia institución.                                                                                                              | <input type="radio"/> | <input type="radio"/> | <input type="radio"/>    | <input type="radio"/>          | <input type="radio"/>         |
| Voy a una biblioteca local (pública, académica, etc.) para leer literatura científica impresa.                                                               | <input type="radio"/> | <input type="radio"/> | <input type="radio"/>    | <input type="radio"/>          | <input type="radio"/>         |
| Consulto literatura científica en línea a través de un acceso institucional (por ejemplo a través de mi afiliación con una universidad u otra organización). | <input type="radio"/> | <input type="radio"/> | <input type="radio"/>    | <input type="radio"/>          | <input type="radio"/>         |
| Solicito artículos de revistas de la Biblioteca de la UICN.                                                                                                  | <input type="radio"/> | <input type="radio"/> | <input type="radio"/>    | <input type="radio"/>          | <input type="radio"/>         |
| Solicito artículos de revistas directamente al autor.                                                                                                        | <input type="radio"/> | <input type="radio"/> | <input type="radio"/>    | <input type="radio"/>          | <input type="radio"/>         |
| Accedo a través de mi propia suscripción a título personal a una o varias revistas.                                                                          | <input type="radio"/> | <input type="radio"/> | <input type="radio"/>    | <input type="radio"/>          | <input type="radio"/>         |
| Le pregunto a un amigo o colega que tiene acceso a literatura científica en línea.                                                                           | <input type="radio"/> | <input type="radio"/> | <input type="radio"/>    | <input type="radio"/>          | <input type="radio"/>         |
| Accedo a todo lo que pueda encontrar en Internet de forma gratuita (a través de Google Scholar, revistas de acceso libre, ResearchGate, etc.)                | <input type="radio"/> | <input type="radio"/> | <input type="radio"/>    | <input type="radio"/>          | <input type="radio"/>         |

11. Si tuviera acceso institucional a literatura científica en línea, con qué frecuencia la utilizaría para su trabajo con la UICN?

|                       |                       |                          |                                |                               |
|-----------------------|-----------------------|--------------------------|--------------------------------|-------------------------------|
| Nunca                 | Raramente             | A veces (una vez al mes) | A menudo (una vez a la semana) | Muy frecuentemente (a diario) |
| <input type="radio"/> | <input type="radio"/> | <input type="radio"/>    | <input type="radio"/>          | <input type="radio"/>         |

\* 12. ¿Qué efecto tendría el acceso institucional a literatura científica en línea sobre la calidad de su trabajo con la UICN?

|                           |                           |                          |                       |
|---------------------------|---------------------------|--------------------------|-----------------------|
| Ningún efecto en absoluto | Un ligero efecto positivo | Efecto positivo moderado | Gran efecto positivo  |
| <input type="radio"/>     | <input type="radio"/>     | <input type="radio"/>    | <input type="radio"/> |

Explique su respuesta si lo desea.

\* 13. ¿Qué impacto tiene la falta de acceso institucional a literatura científica en línea sobre su trabajo con la UICN?

|                            |                          |                              |                          |
|----------------------------|--------------------------|------------------------------|--------------------------|
| Ningún impacto en absoluto | Un leve impacto negativo | Un impacto negativo moderado | Un gran impacto negativo |
| <input type="radio"/>      | <input type="radio"/>    | <input type="radio"/>        | <input type="radio"/>    |

Explique su respuesta si lo desea.

14. ¿Tiene algún otro comentario, preguntas o sugerencias?

15. Si no le importa ser contactado en el futuro (por ejemplo, para dar más detalles sobre sus respuestas o para participar en un grupo focal sobre la temática), por favor deje su información de contacto a continuación.

**Nombre**

**Dirección de correo electrónico**
