# Supplementary material for: Access to scientific literature by the conservation community
Source: PubMed Central journal article supplement (PMC7354838; doi:10.7717/peerj.9404), 2020-07-09
Supplement: peerj-08-9404-s003.pdf [file peerj-08-9404-s003.pdf]

## Enquête de l'UICN sur l'accès à la littérature scientifique

Merci de répondre à cette enquête de la [bibliothèque du siège de l'UICN](#) au sujet de votre accès à la littérature scientifique

Le but de cette enquête est de comprendre l'importance de l'accès à la littérature scientifique pour le Secrétariat de l'UICN, les Commissions et les Membres afin de guider l'unité Science et Connaissance - et notamment la bibliothèque du siège de l'UICN - et améliorer notre soutien en la matière. Pour ce faire, nous avons besoin de comprendre quels sont les niveaux et moyens d'accès à la littérature scientifique dont vous précisez. Au cours de cette enquête, nous définissons le terme « littérature scientifique » comme les revues scientifiques évaluées par des pairs et les ouvrages techniques.

Cette enquête devrait vous prendre 5 à 7 minutes et est anonyme. Vous aurez la possibilité de laisser vos coordonnées à la fin si vous le souhaitez.

1. Quelle est votre relation avec l'UICN? Cochez tout ce qui correspond.

- Etat Membre
- Agence gouvernementale Membre
- ONG internationale Membre
- ONG nationale Membre
- Membre affilié
- Membre CEC
- Membre CPEES
- Membre CGE
- Membre CSE
- Membre CMDE
- Membre CMAP
- Personnel du Secrétariat
- Autres (veuillez spécifier)

2. Dans quel pays/territoire êtes-vous basé?

3. Sexe

- Femme
- Homme

\* 4. A quelle fréquence devez-vous consulter de la littérature scientifique pour votre travail lié à l'UICN?

Jamais

Rarement

Parfois (une fois par  
mois)

Souvent (une fois par  
semaine)

Très fréquemment (tous  
les jours)

## Enquête de l'UICN sur l'accès à la littérature scientifique

\* 5. Avec quelle facilité arrivez-vous à obtenir de la littérature scientifique dont vous avez besoin pour votre travail lié à l'UICN?

Difficilement

Pas facilement

Facilement

Très facilement

N'hésitez pas à fournir plus d'explications (si nécessaire)

\* 6. Quelle importance a la facilité d'accès à la littérature scientifique pour votre travail lié à l'UICN?

Pas d'importance

Peu d'importance

Très important

Essentiel

N'hésitez pas à fournir plus d'explications (si nécessaire)

7. Quel est le journal scientifique qui aurait le plus d'impact sur votre travail lié à l'UICN si vous pouviez y accéder facilement?

8. Dans quel format préférez-vous lire la littérature scientifique?

Je préfère lire sur écran

Je préfère imprimer pour lire

Je préfère lire l'exemplaire original en papier

Articles

Livres

N'hésitez pas à fournir plus d'exceptions (si besoin)

\* 9. Avez-vous un accès institutionnel à la littérature scientifique en ligne (par exemple par affiliation à une université ou autre organisation)?

- Oui  
 Non

\* 10. Avec quelle fréquence utilisez-vous les moyens suivants pour accéder à la littérature scientifique pour votre travail lié à l'UICN?

|                                                                                                                                                       | Jamais ou pas disponible | Rarement              | Parfois (une fois par mois) | Souvent (une fois par semaine) | Très fréquemment (tous les jours) |
|-------------------------------------------------------------------------------------------------------------------------------------------------------|--------------------------|-----------------------|-----------------------------|--------------------------------|-----------------------------------|
| J'utilise la bibliothèque de mon institution.                                                                                                         | <input type="radio"/>    | <input type="radio"/> | <input type="radio"/>       | <input type="radio"/>          | <input type="radio"/>             |
| J'utilise une bibliothèque locale (publique, académique, etc.) pour lire des exemplaires de littérature scientifique en version imprimée.             | <input type="radio"/>    | <input type="radio"/> | <input type="radio"/>       | <input type="radio"/>          | <input type="radio"/>             |
| J'ai un accès institutionnel à la littérature scientifique en ligne (par affiliation à une université ou autre organisation).                         | <input type="radio"/>    | <input type="radio"/> | <input type="radio"/>       | <input type="radio"/>          | <input type="radio"/>             |
| Je demande les articles à la bibliothécaire de l'UICN.                                                                                                | <input type="radio"/>    | <input type="radio"/> | <input type="radio"/>       | <input type="radio"/>          | <input type="radio"/>             |
| Je demande les articles directement à leur auteur.                                                                                                    | <input type="radio"/>    | <input type="radio"/> | <input type="radio"/>       | <input type="radio"/>          | <input type="radio"/>             |
| J'utilise mon inscription à titre privé pour lire différents journaux scientifiques.                                                                  | <input type="radio"/>    | <input type="radio"/> | <input type="radio"/>       | <input type="radio"/>          | <input type="radio"/>             |
| Je demande à un ami ou collègue qui a accès à la littérature scientifique en ligne.                                                                   | <input type="radio"/>    | <input type="radio"/> | <input type="radio"/>       | <input type="radio"/>          | <input type="radio"/>             |
| J'utilise ce que je trouve en ligne et gratuitement (par exemple à travers Google Scholar, à travers de journaux en libre-accès, ResearchGate, etc.). | <input type="radio"/>    | <input type="radio"/> | <input type="radio"/>       | <input type="radio"/>          | <input type="radio"/>             |

## Enquête de l'UICN sur l'accès à la littérature scientifique

11. Si vous aviez un accès institutionnel à la littérature scientifique en ligne, avec quelle fréquence l'utiliseriez-vous pour votre travail lié à l'UICN?

| Jamais                | Rarement              | Parfois (une fois par semaine) | Souvent (une fois par semaine) | Très fréquemment (tous les jours) |
|-----------------------|-----------------------|--------------------------------|--------------------------------|-----------------------------------|
| <input type="radio"/> | <input type="radio"/> | <input type="radio"/>          | <input type="radio"/>          | <input type="radio"/>             |

\* 12. Quel impact aurait un accès institutionnel à la littérature scientifique en ligne sur la qualité de votre travail lié à l'UICN?

| Pas d'effet           | Effet positif faible  | Effet positif modéré  | Grand effet positif   |
|-----------------------|-----------------------|-----------------------|-----------------------|
| <input type="radio"/> | <input type="radio"/> | <input type="radio"/> | <input type="radio"/> |

N'hésitez pas à fournir plus d'explications (si besoin)

\* 13. Quel impact a le manque d'accès institutionnel à la littérature scientifique en ligne sur votre travail lié à l'UICN?

| Pas d'impact          | Impact négatif faible | Impact négatif modéré | Grand impact négatif  |
|-----------------------|-----------------------|-----------------------|-----------------------|
| <input type="radio"/> | <input type="radio"/> | <input type="radio"/> | <input type="radio"/> |

N'hésitez pas à fournir plus d'explications (si besoin)

14. Avez-vous d'autres commentaires, suggestions ou questions?

15. Si vous ne voyez pas d'inconvénient à être contacté à l'avenir (par exemple pour développer vos réponses ou participer à des groupes de discussions ciblés sur cette thématique), merci de laisser vos coordonnées ci-dessous.

**Nom**

**Courriel**
