# Supplementary material for: Access to scientific literature by the conservation community
Source: PeerJ. 2020 Jul 9;8:e9404. doi: 10.7717/peerj.9404 (PMC7354838; doi:10.7717/peerj.9404)
Supplement: Supplemental Information 4 [file peerj-08-9404-s004.xlsx]

## Sheet: EN
RespondentID	To which component(s) of IUCN do you belong? Tick all that apply.													In which country/territory are you based?	Gender	How frequently should you be consulting scientific literature to carry out your IUCN-related work?		How easy is it for you currently to obtain the scientific literature you need to carry outÂ your IUCN-related work?		How important is it for your IUCN-related work to have easy access to scientific literature?		Which one scientific journal would have the largest impact on your IUCN-related work if you could obtain easy access to it?	In what format do you prefer to readÂ scientific literature?			Do you have institutional access to scientific literatureÂ online (e.g. through affiliation with a university or other organization)?	How frequently do you use the following means to access scientific literature for your IUCN-related work?								If you had institutional access to scientific literature online, how often would you use this for your IUCN-related work?	What effect would institutional access to scientific literature online have on the quality of your IUCN-related work?		What impact does lack of institutional access to scientific literature online have on your IUCN-related work?		Do you have any other comments, questions, or concerns?
	IUCN State Member	IUCN Government Agency Member	IUCN International NGO Member	IUCN National NGO Member	IUCN Affiliate Member	IUCN CEC member	IUCN CEESP member	IUCN CEM member	IUCN SSC member	IUCN WCEL member	IUCN WCPA member	IUCN Secretariat staff	Other (please specify)	Response	Response		Why?		Please explain (if necessary).		Feel free to explain further.	Open-Ended Response	Journal articles	Books	Other (please specify)	Response	I use the library of my own institution.	I visitÂ a local library (public, academic, etc.) to read scientific literature in print.	I use myÂ institutional access to scientific literature online (e.g. through affiliation with a university or other organization).	I request journal articles from the IUCN Librarian.	I request journal articles from the author.	I access scientific literature throughÂ my own personal subscription to individual journals.	I ask a friend or colleague whomÂ I know has access to scientific literature online.	I access whatever I can find online for free (via Google Scholar, open-access journals, ResearchGate, etc.)			Feel free to explain further.		Feel free to explain further.	Open-Ended Response
4910670325						IUCN CEC member								Bangladesh	Male	FrequentlyÂ (once a week)		Not easy	It is easy to get documents from international origin; but not at all easy to work in local aspects	Very important	The IUCN related reference is highly acceptable in our country. Thus it is very important to have IUCN documents for local aspects	Biodiversity related journals	I prefer printingÂ out to read	I prefer the original hard copy		Yes	FrequentlyÂ (once a week)	Infrequently	Very frequently (daily)	Sometimes (once a month)	Very frequently (daily)	Very frequently (daily)	Very frequently (daily)	Very frequently (daily)						IUCN should have a strong library locally specially in Bangladesh. Good initiative to preserve all related documents in local documentation center is needed. For enriching local library or documents academicians from Dhaka University should be included fro guidance.
4910646846									IUCN SSC member					Russian Federation	Male	FrequentlyÂ (once a week)		Not at all easy		Very important		elsevier, springer	I prefer printingÂ out to read	I prefer printingÂ out to read		No	Sometimes (once a month)	Sometimes (once a month)	Never or not available	Never or not available	Sometimes (once a month)	Never or not available	Never or not available	FrequentlyÂ (once a week)	Infrequently	Slight positive effect		Slight negative impact
4910513691								IUCN CEM member						United States of America	Female	Sometimes (once a month)		Not easy	I work freelance and am not associated with a library. Scientific literature is often unavailable without access to a subscription to the relevant journal.	Somewhat important		Nature	I prefer reading on a screen	I prefer the original hard copy		No	Never or not available	Never or not available	Never or not available	Never or not available	Infrequently	Never or not available	Never or not available	Sometimes (once a month)	Infrequently	Slight positive effect	I never know what assignments I will have as a freelance, so it is hard to anticipate how much I would use scientific literature. I work in long range planning, so specific environmental journals are often of my interest to me than my clients.	Slight negative impact
4910490804									IUCN SSC member					South Africa	Female	Infrequently		Easy	I am registered as a PhD student and have online access to university library	Essential		Herpetology	I prefer printingÂ out to read	I prefer the original hard copy		Yes	Infrequently	Never or not available	FrequentlyÂ (once a week)	Never or not available	Infrequently	Never or not available	Infrequently	FrequentlyÂ (once a week)
4910480651											IUCN WCPA member			United Kingdom of Great Britain and Northern Ireland	Male	Very frequently (daily)		Easy	usually by working with global leading scientists and via the internet	Essential	evidence based is critical	no single journal	I prefer reading on a screen	I prefer reading on a screen		No	Never or not available	Never or not available	Infrequently	Never or not available	Sometimes (once a month)	Sometimes (once a month)	FrequentlyÂ (once a week)	Very frequently (daily)	Frequently (once a week)	Great positive effect		Slight negative impact
4910440149				IUCN National NGO Member					IUCN SSC member					Lebanon	Female	Sometimes (once a month)		Not easy		Very important		CONSERVATION BIOLOGY	I prefer printingÂ out to read	I prefer printingÂ out to read		No	Sometimes (once a month)	Infrequently	Never or not available	Never or not available	Infrequently	Never or not available	Sometimes (once a month)	FrequentlyÂ (once a week)	Frequently (once a week)	Great positive effect		Moderate negative impact
4910428525									IUCN SSC member					The Netherlands	Male	Infrequently
4910196051				IUCN National NGO Member										Ecuador	Female	Sometimes (once a month)		Not easy		Very important		Conservation Biology, Trends in Ecology and Evolution	I prefer reading on a screen	I prefer reading on a screen		Yes	Sometimes (once a month)	Infrequently	Very frequently (daily)	Never or not available	Infrequently	Never or not available	Infrequently	Sometimes (once a month)						We are a new IUCN member since last year. We were not aware of the IUCN HQ library resource. Certainly, it is useful to find IUCN and Red list material and publications and we will certainly use this platform for now on. Personally, I have found IUCN literature through University system, google scholar and online services. But having a IUCN specific online library will be faster. Thanks.
4910136433												IUCN Secretariat staff			Female	FrequentlyÂ (once a week)		Not easy	I don't how I can access them sometimes.	Essential			I prefer the original hard copy	I prefer the original hard copy		No	FrequentlyÂ (once a week)	Infrequently	Never or not available	Infrequently	Never or not available	Sometimes (once a month)	Sometimes (once a month)	Sometimes (once a month)	Frequently (once a week)	Great positive effect	When we provide advice to state parties you need scientific bases to build your advice on them	Great negative impact
4910058413									IUCN SSC member					Malaysia	Male	FrequentlyÂ (once a week)		Easy		Very important		Biological Conservation	I prefer reading on a screen	I prefer the original hard copy		No	Sometimes (once a month)	Never or not available	Never or not available	Never or not available	Sometimes (once a month)	Never or not available	FrequentlyÂ (once a week)	FrequentlyÂ (once a week)	Sometimes (once a month)	Moderate positive effect		Moderate negative impact		no
4910058300				IUCN National NGO Member			IUCN CEESP member							Bangladesh	Male	Infrequently		Not easy		Very important			I prefer the original hard copy	I prefer the original hard copy		Yes	Infrequently	Infrequently	Sometimes (once a month)	Never or not available	Infrequently	Infrequently	Infrequently	Sometimes (once a month)
4910028848									IUCN SSC member					Iran (Islamic Republic of)	Female	Sometimes (once a month)		Not easy		Very important		Chelonian Conservation and Biology ISSN:1071-8443	I prefer reading on a screen	I prefer the original hard copy		No	Never or not available	Never or not available	Sometimes (once a month)	Never or not available	Sometimes (once a month)	Never or not available	Sometimes (once a month)	Sometimes (once a month)	Sometimes (once a month)	Great positive effect		Slight negative impact
4909999299							IUCN CEESP member				IUCN WCPA member			Australia	Female	Infrequently		Very easy	I am a staff member of a university and have access to online scientific data bases (and other data bases).	Very important		There are many journals that will have varying relevancies based on the subject being researched/explored.	I prefer printingÂ out to read	I prefer printingÂ out to read		Yes	Infrequently	Never or not available	Infrequently	Never or not available	Infrequently	Never or not available	Never or not available	Infrequently						An IUCN Library is essential for members who do not have free access to scientific databases. This resource is important for these members.
4909998574			IUCN International NGO Member												Male	Infrequently		Easy		Very important		Ecotoxicology	I prefer reading on a screen	I prefer reading on a screen		Yes	Sometimes (once a month)	Infrequently	Never or not available	Never or not available	Infrequently	Never or not available	Infrequently	Very frequently (daily)						Thank you
4909974011	IUCN State Member					IUCN CEC member								Bangladesh	Female	Infrequently
4909957012									IUCN SSC member					China	Male	Sometimes (once a month)
4909803026									IUCN SSC member		IUCN WCPA member			United States of America	Female	Very frequently (daily)		Very easy	This is only because I have an adjunct affiliation at a university. Otherwise, I would have no access to the literature.	Essential			I prefer reading on a screen	I prefer the original hard copy		Yes	Never or not available	Never or not available	Very frequently (daily)	Never or not available	Infrequently	Never or not available	Never or not available	Very frequently (daily)
4909717615		IUCN Government Agency Member				IUCN CEC member								Gambia	Female	Sometimes (once a month)		Not easy	Internet limitation	Very important		Policy and education	I prefer reading on a screen	I prefer printingÂ out to read		No	FrequentlyÂ (once a week)	Never or not available	Infrequently	Never or not available	Never or not available	Infrequently	Infrequently	Very frequently (daily)	Very frequently (daily)	Great positive effect		Slight negative impact
4909617971			IUCN International NGO Member											Libya	Male	Never
4909609587									IUCN SSC member					Zambia	Male	FrequentlyÂ (once a week)		Easy		Very important			I prefer reading on a screen	I prefer printingÂ out to read		Yes	FrequentlyÂ (once a week)	Never or not available	FrequentlyÂ (once a week)	Never or not available	Infrequently	FrequentlyÂ (once a week)	Sometimes (once a month)	Very frequently (daily)						no
4909493782				IUCN National NGO Member				IUCN CEM member						Italy	Male	Very frequently (daily)		Easy		Essential		ICES Journal of Marine Science	I prefer printingÂ out to read	I prefer reading on a screen		No	Infrequently	Never or not available	Never or not available	Infrequently	FrequentlyÂ (once a week)	Infrequently	FrequentlyÂ (once a week)	Very frequently (daily)	Very frequently (daily)	Great positive effect	It would help me have access to the latest papers.	Slight negative impact
4909369663									IUCN SSC member					Slovakia	Male	FrequentlyÂ (once a week)		Easy	I primarily use researchgate.net and direct requests to authors.	Essential		Conservation Biology	I prefer reading on a screen	I prefer the original hard copy		No	Very frequently (daily)	Infrequently	Never or not available	Never or not available	FrequentlyÂ (once a week)	Never or not available	Never or not available	Very frequently (daily)	Frequently (once a week)	Moderate positive effect		Slight negative impact		Is it possible to access journals via IUCN as a member of SSC SGs?
4909218689						IUCN CEC member	IUCN CEESP member	IUCN CEM member	IUCN SSC member	IUCN WCEL member	IUCN WCPA member			Jordan	Female	FrequentlyÂ (once a week)		Not easy		Very important			I prefer reading on a screen	I prefer the original hard copy		No	Never or not available	Never or not available	Never or not available	Infrequently	Infrequently	Sometimes (once a month)	Infrequently	FrequentlyÂ (once a week)	Very frequently (daily)	Great positive effect		Moderate negative impact
4909217386									IUCN SSC member					Greece	Female	Infrequently		Easy	Access to data bases as a prof. of the University of Athens	Very important		Journal of fish biology	I prefer reading on a screen	I prefer reading on a screen		Yes	Very frequently (daily)	Infrequently	Never or not available	Never or not available	Infrequently	Never or not available	Infrequently	Sometimes (once a month)						no
4909210962						IUCN CEC member								Bangladesh	Male	FrequentlyÂ (once a week)		Not easy		Very important			I prefer reading on a screen	I prefer the original hard copy		Yes	FrequentlyÂ (once a week)	Sometimes (once a month)	FrequentlyÂ (once a week)	Never or not available	Infrequently	Infrequently	Infrequently	FrequentlyÂ (once a week)
4909151659									IUCN SSC member					Sri Lanka	Female	FrequentlyÂ (once a week)		Easy	Access through the University of Zurich, Switzerland	Essential	I am compiling abstracts of recently published articles on Asian elephants to be published in the Asian Elephant Specialist Group's journal "Gajah"	don't have a favourite - elephant stuff is published all over	I prefer reading on a screen	I prefer the original hard copy		Yes	Never or not available	Never or not available	FrequentlyÂ (once a week)	Never or not available	Sometimes (once a month)	Never or not available	Infrequently	Sometimes (once a month)
4909097496									IUCN SSC member					Lebanon	Male	FrequentlyÂ (once a week)		Not easy		Very important		Many related to ecology	I prefer reading on a screen	I prefer the original hard copy		No	Never or not available	Sometimes (once a month)	Sometimes (once a month)	Never or not available	Sometimes (once a month)	Sometimes (once a month)	Very frequently (daily)	Very frequently (daily)	Very frequently (daily)	Moderate positive effect		Moderate negative impact
4909080924									IUCN SSC member					United States of America	Male	Infrequently		Easy	I have an extensive library	Very important		Copeia	I prefer the original hard copy	I prefer the original hard copy		No	FrequentlyÂ (once a week)	Never or not available	Never or not available	Never or not available	Sometimes (once a month)	Sometimes (once a month)	Infrequently	Sometimes (once a month)	Infrequently	Moderate positive effect		Slight negative impact		n/a
4909051936									IUCN SSC member					Mexico	Male	Sometimes (once a month)		Easy		Very important		Science	I prefer reading on a screen	I prefer the original hard copy		Yes	FrequentlyÂ (once a week)	Infrequently	FrequentlyÂ (once a week)	Never or not available	Never or not available	FrequentlyÂ (once a week)	Never or not available	FrequentlyÂ (once a week)
4908993027									IUCN SSC member					Malaysia	Male	Sometimes (once a month)		Easy		Very important		Journal of Wildlife Management	I prefer reading on a screen	I prefer reading on a screen		Yes	Never or not available	Never or not available	FrequentlyÂ (once a week)	Never or not available	Infrequently	Infrequently	Infrequently	Sometimes (once a month)
4908989980														Guatemala	Male	FrequentlyÂ (once a week)		Not easy		Somewhat important		Medicine	I prefer the original hard copy	I prefer the original hard copy		No	Infrequently	Never or not available	Never or not available	Infrequently	FrequentlyÂ (once a week)	FrequentlyÂ (once a week)	FrequentlyÂ (once a week)	Very frequently (daily)	Frequently (once a week)	Great positive effect		Slight negative impact
4908973969									IUCN SSC member					Nigeria	Male	Very frequently (daily)		Not easy	Network connection and power supply remain a major challenge in Nigeria	Essential	Literature search in essential to all facets of my career: research, teaching and extension services	Biological Conservation	I prefer the original hard copy	I prefer the original hard copy		No	FrequentlyÂ (once a week)	Sometimes (once a month)	Sometimes (once a month)	FrequentlyÂ (once a week)	Very frequently (daily)	Very frequently (daily)	FrequentlyÂ (once a week)	Very frequently (daily)	Very frequently (daily)	Great positive effect		Great negative impact
4908955988				IUCN National NGO Member										United States of America	Female	Sometimes (once a month)		Not easy		Somewhat important			I prefer printingÂ out to read	I prefer printingÂ out to read		No	Sometimes (once a month)	Never or not available	Never or not available	Never or not available	Never or not available	Never or not available	Never or not available	FrequentlyÂ (once a week)
4908869957	IUCN State Member					IUCN CEC member					IUCN WCPA member			Canada	Female	Infrequently		Not easy	Limited access to relevant academic journals	Very important			I prefer reading on a screen	I prefer the original hard copy		No	Never or not available	Infrequently	Infrequently	Never or not available	Never or not available	Never or not available	Sometimes (once a month)	Sometimes (once a month)	Sometimes (once a month)	Moderate positive effect		Slight negative impact
4908734541									IUCN SSC member					United States of America	Female	FrequentlyÂ (once a week)		Not easy	many journals charge for access to articles ... I am retired so not associated with an institution that has easy access	Very important		Biological Invasions			I like to download the PDF, convert it to text, and then use the text version so I can annotate it	No	Never or not available	Never or not available	Never or not available	Never or not available	Sometimes (once a month)	Never or not available	Sometimes (once a month)	Infrequently	Frequently (once a week)	Great positive effect		Moderate negative impact
4908710398									IUCN SSC member					United States of America	Male	Infrequently		Very easy		Essential		n/a	I prefer reading on a screen	I prefer the original hard copy		Yes	Infrequently	Never or not available	Infrequently	Never or not available	Infrequently	Infrequently	Infrequently	Infrequently
4908664690									IUCN SSC member					United States of America	Female	FrequentlyÂ (once a week)		Not easy	My organisation is no longer affiliated with a University, so we lost access to their library this last month. I don't know yet how difficult it will be to keep up to date...	Very important		Can't pick one, Top 3: Conservation Genetics, Conservation Biology, Molecular Ecology...	I prefer printingÂ out to read	I prefer the original hard copy		No	Never or not available	Never or not available	Never or not available	Never or not available	Infrequently	Infrequently	Infrequently	FrequentlyÂ (once a week)	Sometimes (once a month)	Great positive effect		Moderate negative impact
4908663086									IUCN SSC member					Costa Rica	Male	FrequentlyÂ (once a week)		Not at all easy	I am officially retired and do not have access to a University system library online.	Essential	Being able to access the needed literature.	not just one	I prefer the original hard copy	I prefer the original hard copy	Online is OK.	No	Never or not available	Never or not available	Never or not available	Infrequently	Very frequently (daily)	Never or not available	Infrequently	Very frequently (daily)	Frequently (once a week)	Great positive effect		Moderate negative impact
4908660369										IUCN WCEL member				Argentina	Male	FrequentlyÂ (once a week)		Easy		Very important			I prefer printingÂ out to read	I prefer the original hard copy		No	Infrequently	Never or not available	Never or not available	Never or not available	Infrequently	Sometimes (once a month)	Sometimes (once a month)	Infrequently	Frequently (once a week)	Great positive effect		Moderate negative impact		no.
4908626361									IUCN SSC member					Brazil	Male	FrequentlyÂ (once a week)		Not at all easy		Very important			I prefer reading on a screen	I prefer the original hard copy		Yes	Infrequently	Infrequently	Very frequently (daily)	Infrequently	Sometimes (once a month)	Never or not available	Sometimes (once a month)	Sometimes (once a month)
4908623851			IUCN International NGO Member											Canada	Male	Infrequently		Easy		Very important		Journal of Mammology	I prefer printingÂ out to read	I prefer reading on a screen		No	Never or not available	Infrequently	Never or not available	Infrequently	Sometimes (once a month)	FrequentlyÂ (once a week)	FrequentlyÂ (once a week)	Very frequently (daily)	Frequently (once a week)	Moderate positive effect		Moderate negative impact
4908616374									IUCN SSC member					United States of America	Male	Very frequently (daily)		Not easy		Essential		there is not one, of course.	I prefer reading on a screen	I prefer the original hard copy		No	Infrequently	Sometimes (once a month)	Never or not available	Never or not available	FrequentlyÂ (once a week)	Never or not available	FrequentlyÂ (once a week)	FrequentlyÂ (once a week)	Frequently (once a week)	Great positive effect		Moderate negative impact
4908552032									IUCN SSC member					Italy	Male	FrequentlyÂ (once a week)		Easy		Very important			I prefer reading on a screen	I prefer the original hard copy		Yes	FrequentlyÂ (once a week)	Sometimes (once a month)	FrequentlyÂ (once a week)	Infrequently	Sometimes (once a month)	Never or not available	Never or not available	Sometimes (once a month)
4908530961											IUCN WCPA member			United States of America	Female	Infrequently
4908466738						IUCN CEC member									Female	Sometimes (once a month)		Easy		Essential			I prefer printingÂ out to read	I prefer reading on a screen		Yes	Never or not available	Infrequently	Infrequently	Infrequently	Sometimes (once a month)	Infrequently	Infrequently	Sometimes (once a month)
4908453679									IUCN SSC member					Madagascar	Female	Sometimes (once a month)
4908430433									IUCN SSC member			IUCN Secretariat staff		United States of America	Male	FrequentlyÂ (once a week)		Not easy	As a Red List Authority Coordinator I rely on access to taxonomic descriptions in particular, and routinely have to request these from the authors as this material is rarely published in open access journals. I would have chosen 'Not at all easy' if ResearchGate didn't now include a number of these papers.	Essential		Zootaxa	I prefer reading on a screen			No	Never or not available	Infrequently	Never or not available	Never or not available	FrequentlyÂ (once a week)	Never or not available	Infrequently	Very frequently (daily)	Very frequently (daily)	Great positive effect		Slight negative impact	The impact would be more severe if I weren't able to access material via authors and ResearchGate. As it is, it is mostly a time sink as this takes more time and effort than obtaining papers directly from journals. The impact is more severe in cases where literature is not available through these avenues.
4908412991		IUCN Government Agency Member												United States of America	Male	Infrequently		Not at all easy		Somewhat important		Conservation Biology	I prefer reading on a screen	I prefer the original hard copy		Yes	Infrequently	Never or not available	Infrequently	Never or not available	Never or not available	Sometimes (once a month)	Infrequently	Sometimes (once a month)						My work mostly does not directly involve IUCN related activities, so it is hard for me to know how best to respond to the questions.
4908309950									IUCN SSC member					United States of America	Female	Very frequently (daily)		Not easy		Essential		ecology	I prefer reading on a screen	I prefer reading on a screen		No	Never or not available	Never or not available	Never or not available	Sometimes (once a month)	Sometimes (once a month)	Never or not available	Very frequently (daily)	Very frequently (daily)	Very frequently (daily)	Great positive effect		Moderate negative impact
4908161133													None	Botswana	Male	FrequentlyÂ (once a week)		Not at all easy	Not a well-known database	Very important		Those in the area of Sports Science and Medicine	I prefer printingÂ out to read	I prefer the original hard copy		Yes	Infrequently	Never or not available	FrequentlyÂ (once a week)	Never or not available	Infrequently	Never or not available	Never or not available	Very frequently (daily)						Just for you to find ways of making the Data-base very visible
4908146979											IUCN WCPA member			Egypt	Male	Infrequently		Easy		Very important			I prefer reading on a screen	I prefer reading on a screen		Yes	Infrequently	Never or not available	Sometimes (once a month)	Never or not available	Infrequently	Sometimes (once a month)	Infrequently	Very frequently (daily)
4908094850													IUCN, SSG for Horseshoe Crabs, member of Steering Committee	United States of America	Male	Sometimes (once a month)		Easy		Very important		Conservation Biology and Science	I prefer printingÂ out to read	I prefer the original hard copy		Yes	FrequentlyÂ (once a week)	Sometimes (once a month)	FrequentlyÂ (once a week)	Infrequently	Sometimes (once a month)	Sometimes (once a month)	Never or not available	Sometimes (once a month)
4907955081	IUCN State Member													United States of America	Male	FrequentlyÂ (once a week)		Not at all easy		Very important		too many to choose one	I prefer reading on a screen	I prefer the original hard copy		Yes	Infrequently	Never or not available	Sometimes (once a month)	Never or not available	Never or not available	Never or not available	Infrequently	FrequentlyÂ (once a week)						My school institution has only limited access to scientific journals online
4907880586									IUCN SSC member					Ethiopia	Male	FrequentlyÂ (once a week)		Easy		Very important			I prefer reading on a screen	I prefer printingÂ out to read		Yes	Very frequently (daily)	FrequentlyÂ (once a week)	Sometimes (once a month)	Infrequently	Infrequently	Infrequently	Sometimes (once a month)	Very frequently (daily)						No
4907840661									IUCN SSC member					India	Male	Never
4907788721	IUCN State Member	IUCN Government Agency Member				IUCN CEC member								Zimbabwe	Male	Sometimes (once a month)		Easy		Essential		Philosophical Transactions of the Royal Society B	I prefer the original hard copy	I prefer the original hard copy		Yes	FrequentlyÂ (once a week)	Never or not available	FrequentlyÂ (once a week)	Infrequently	Never or not available	Sometimes (once a month)	Sometimes (once a month)	FrequentlyÂ (once a week)						no.
4907745571												IUCN Secretariat staff		Switzerland	Female	Sometimes (once a month)		Easy		Very important			I prefer printingÂ out to read	I prefer printingÂ out to read		No	Infrequently	Never or not available	Never or not available	Infrequently	Infrequently	Never or not available	Never or not available	Sometimes (once a month)	Sometimes (once a month)	Slight positive effect		Slight negative impact
4907740192									IUCN SSC member					Italy	Male	FrequentlyÂ (once a week)		Very easy		Essential			I prefer reading on a screen	I prefer reading on a screen		Yes	Never or not available	Never or not available	FrequentlyÂ (once a week)	Never or not available	Infrequently	Never or not available	Infrequently	FrequentlyÂ (once a week)
4907714412			IUCN International NGO Member	IUCN National NGO Member					IUCN SSC member					United Kingdom of Great Britain and Northern Ireland	Female	Sometimes (once a month)		Not easy	I can get abstracts for published papers but not full copies easily.	Somewhat important			I prefer printingÂ out to read	I prefer the original hard copy		No	Sometimes (once a month)	Infrequently	Never or not available	Never or not available	Infrequently	Never or not available	Infrequently	Sometimes (once a month)	Sometimes (once a month)	Great positive effect		Moderate negative impact
4907680177			IUCN International NGO Member											United States of America	Female	FrequentlyÂ (once a week)		Not easy	Some journals I don't have access to - this includes older editions (for baseline population info) and newer journals	Essential		There isn't just one	I prefer printingÂ out to read	I prefer the original hard copy		Yes	Very frequently (daily)	Infrequently	Very frequently (daily)	Never or not available	Infrequently	Never or not available	Sometimes (once a month)	Very frequently (daily)						We have limited or no access to particular series of Journals in JSTOR. This is problematic b/c historic population data and/or AOO is needed to make the case for decline.
4907582909				IUCN National NGO Member					IUCN SSC member					Bangladesh	Male	Infrequently
4907513785									IUCN SSC member					Malaysia	Female	FrequentlyÂ (once a week)		Easy		Very important		Nature	I prefer printingÂ out to read	I prefer the original hard copy		No	Never or not available	Never or not available	Never or not available	Never or not available	Infrequently	Never or not available	Sometimes (once a month)	Sometimes (once a month)	Sometimes (once a month)	Slight positive effect		Slight negative impact
4907504874						IUCN CEC member							IUCN Conservation Centre Tenant	Switzerland	Female	Sometimes (once a month)		Not at all easy	Without paying for academic journal subscriptions, which are costly, it is not always easy to find this on the web.	Somewhat important					Social Science Research Journal	No	Never or not available	Never or not available	Never or not available	Never or not available	Never or not available	Never or not available	Infrequently	FrequentlyÂ (once a week)	Frequently (once a week)	Moderate positive effect		Slight negative impact
4907489723										IUCN WCEL member					Male	Infrequently
4907458700								IUCN CEM member						Mongolia	Female	Infrequently		Easy		Very important			I prefer printingÂ out to read	I prefer reading on a screen		Yes	Infrequently	Infrequently	Very frequently (daily)	Never or not available	Sometimes (once a month)	Never or not available	Sometimes (once a month)	Very frequently (daily)
4907457300		IUCN Government Agency Member	IUCN International NGO Member											Canada	Male	FrequentlyÂ (once a week)		Easy	As an emeritus government employee, I get access to mos trelevant scientific journals from the e-library system of the federal government	Very important		Impossible. One journal would not possibly be enough	I prefer reading on a screen	I prefer the original hard copy	I actually try to respect book copyright	Yes	FrequentlyÂ (once a week)	Infrequently	Very frequently (daily)	Never or not available	Infrequently	Never or not available	Infrequently	Sometimes (once a month)
4907457261					IUCN Affiliate Member									United Kingdom of Great Britain and Northern Ireland	Male	Very frequently (daily)		Easy		Essential			I prefer reading on a screen	I prefer reading on a screen		Yes	Sometimes (once a month)	Infrequently	Very frequently (daily)	Never or not available	FrequentlyÂ (once a week)	Never or not available	Infrequently	Very frequently (daily)
4907425311									IUCN SSC member					Viet Nam	Male	Very frequently (daily)		Very easy		Very important		Mammal Review	I prefer printingÂ out to read	I prefer the original hard copy		No	Sometimes (once a month)	Infrequently	Never or not available	Never or not available	FrequentlyÂ (once a week)	FrequentlyÂ (once a week)	FrequentlyÂ (once a week)	Very frequently (daily)	Very frequently (daily)	Great positive effect		Great negative impact
4907398953									IUCN SSC member					India	Male	FrequentlyÂ (once a week)		Easy		Very important			I prefer reading on a screen	I prefer reading on a screen		Yes	Sometimes (once a month)	Sometimes (once a month)	FrequentlyÂ (once a week)	FrequentlyÂ (once a week)	FrequentlyÂ (once a week)	Infrequently	Sometimes (once a month)	FrequentlyÂ (once a week)						no
4907386225											IUCN WCPA member			The Netherlands	Female	Sometimes (once a month)		Easy		Very important	I was not aware of your library	coral reefs journal Springer and Oryx Conservation Journal	I prefer reading on a screen	I prefer the original hard copy		Yes	Never or not available	Never or not available	Never or not available	Never or not available	Infrequently	Never or not available	Infrequently	FrequentlyÂ (once a week)						I was not aware of your library so now it is nice to know it is available.
4907368799									IUCN SSC member					United Kingdom of Great Britain and Northern Ireland	Female	FrequentlyÂ (once a week)
4907364930											IUCN WCPA member			Kenya	Male	Sometimes (once a month)		Not easy	ICT infrstructure from our university faces challenges	Very important		Conservation Journal, Parks Journal, Nature Journal	I prefer reading on a screen			Yes	Infrequently	Infrequently	Sometimes (once a month)	Infrequently	Infrequently	Never or not available	Never or not available	Sometimes (once a month)
4907301550									IUCN SSC member					Singapore	Female	FrequentlyÂ (once a week)		Easy		Very important						Yes	Never or not available	Infrequently	Sometimes (once a month)	Never or not available	Infrequently	FrequentlyÂ (once a week)	Sometimes (once a month)	Very frequently (daily)
4907295239									IUCN SSC member					Slovakia	Male	Sometimes (once a month)		Easy		Essential		Subterranean Biology	I prefer printingÂ out to read	I prefer the original hard copy		Yes	Infrequently	Infrequently	Very frequently (daily)	Never or not available	Infrequently	Never or not available	Infrequently	Very frequently (daily)						No.
4907285078									IUCN SSC member					France	Male	Sometimes (once a month)		Easy	I have free access by my professionnal activity	Very important			I prefer printingÂ out to read	I prefer the original hard copy		Yes	Sometimes (once a month)	Sometimes (once a month)	Sometimes (once a month)	Never or not available	Sometimes (once a month)	Never or not available	Sometimes (once a month)	Sometimes (once a month)
4907271359									IUCN SSC member					United Arab Emirates	Male	FrequentlyÂ (once a week)		Easy		Very important		Zootaxa	I prefer reading on a screen	I prefer the original hard copy		Yes	Infrequently	Never or not available	Sometimes (once a month)	Never or not available	Sometimes (once a month)	Sometimes (once a month)	FrequentlyÂ (once a week)	FrequentlyÂ (once a week)
4907268186									IUCN SSC member					United States of America	Male	Very frequently (daily)		Not at all easy	Am I even still a member? Why are you guys still sending me email? Not that I mind, it's just that I seem to have been given the heave-ho by your organization in the past few years (or more)...	Essential	You know it is...	Probably Copeia; I am, after all, a herpetologist...	I prefer reading on a screen	I prefer reading on a screen	Trick question. I am checking the first choice in order to increase the possibility for myself and others... I know you didn't ask for it, but to elaborate on the answer below I no longer teach at a university.	No	Never or not available	Infrequently	Never or not available	Never or not available	Infrequently	Never or not available	Sometimes (once a month)	FrequentlyÂ (once a week)	Frequently (once a week)	Great positive effect	As I've already stated, I no longer appear to be associated with the IUCN; however, if I were, and if I were doing IUCN-related work, I would consult the scientific literature online frequently to very frequently. I think you know that it could only have a great positive effect on my work.	No impact at all	No impact at all, because I am not currently doing anything; otherwise, it would have a great negative impact.	Am I in any way still associated with the IUCN Species Survival Commission on anole lizards? Who determines this?
4907263542									IUCN SSC member					Iran (Islamic Republic of)	Male	FrequentlyÂ (once a week)		Easy		Very important		ssc books and redlist.	I prefer reading on a screen	I prefer the original hard copy		No	Very frequently (daily)	Infrequently	Never or not available	Infrequently	Sometimes (once a month)	Infrequently	Sometimes (once a month)	Sometimes (once a month)	Frequently (once a week)	Great positive effect		Moderate negative impact		how can i access to bibliography of my favorite ssc group? hyena special group for example?
4907257611		IUCN Government Agency Member												Sri Lanka	Female	Sometimes (once a month)		Easy	We have a good relationship with IUCN Sri Lanka Secretariat.	Very important	Department of Wildlife Conservation is the major government body that lies with the responsibility of conservation & management of Fauna & Flora of the country. Therefore updated scientific information is very important.	Parks	I prefer printingÂ out to read	I prefer the original hard copy		No	Sometimes (once a month)	Infrequently	Never or not available	Sometimes (once a month)	Sometimes (once a month)	Never or not available	Sometimes (once a month)	FrequentlyÂ (once a week)	Frequently (once a week)	Moderate positive effect		Moderate negative impact
4907253537									IUCN SSC member					Serbia	Male	FrequentlyÂ (once a week)		Easy		Essential		Mammal Review	I prefer reading on a screen	I prefer the original hard copy		No	Never or not available	Infrequently	Never or not available	Never or not available	Sometimes (once a month)	Never or not available	Sometimes (once a month)	Very frequently (daily)	Frequently (once a week)	Moderate positive effect		Slight negative impact
4907228812				IUCN National NGO Member										South Africa	Male	Sometimes (once a month)		Not easy	High cost of subscriptions, and multiple subscriptions, to scientific journals	Somewhat important	The various commissions refer to research papers, so easy access will enable studying the base documents of policy proposals	Education for Sustainable Development	I prefer reading on a screen	I prefer the original hard copy		No	Never or not available	Never or not available	Sometimes (once a month)	Never or not available	Infrequently	Never or not available	Infrequently	FrequentlyÂ (once a week)	Sometimes (once a month)	Slight positive effect	We access literature to develop position papers on current or emerging critical issues (eg ivory trade, enviro-education, climate change), developing EE resource materials, research for tertiary degree studies and commenting on legislation/policy proposals. Access to more scientific literature than just Google searches would uplift the quality of our outputs	Slight negative impact		Suggest the creation of a second login per member organisation, that could be shared with all the staff of the organisation to be able to access the IUCN library only. That way our staff could all access the library, but without compromising the primary login.
4907228409									IUCN SSC member					Italy	Female	Sometimes (once a month)		Not easy	I only have access to the Cat Specialist Group library. If I need specific other literature it is very timeconsuming to search for by keywords, select, order, etc. It would be a great improvement if the Cat SG library would be widened to other species and access given to members.	Essential	Conservation work can only profit from knowledge gained though others.	no specific single journal	I prefer reading on a screen	I prefer reading on a screen		No	Never or not available	Never or not available	Never or not available	Never or not available	FrequentlyÂ (once a week)	Never or not available	Infrequently	FrequentlyÂ (once a week)	Frequently (once a week)	Moderate positive effect		Slight negative impact
4907170805						IUCN CEC member					IUCN WCPA member			Taiwan, Province of China, China	Female	Sometimes (once a month)		Easy		Very important		PARK	I prefer printingÂ out to read	I prefer the original hard copy		Yes	FrequentlyÂ (once a week)	FrequentlyÂ (once a week)	FrequentlyÂ (once a week)	Never or not available	Never or not available	Never or not available	Sometimes (once a month)	Infrequently						Thanks, IUCN HQ Library and staff!
4907168168									IUCN SSC member			IUCN Secretariat staff		Philippines	Female	FrequentlyÂ (once a week)
4907166127											IUCN WCPA member			Indonesia	Male	FrequentlyÂ (once a week)		Not easy		Very important		conservation biology	I prefer reading on a screen	I prefer the original hard copy		No	Never or not available	Infrequently	Infrequently	Infrequently	Infrequently	Never or not available	Infrequently	FrequentlyÂ (once a week)	Frequently (once a week)	Great positive effect		Great negative impact		no
4907165295								IUCN CEM member						Egypt	Female	Infrequently		Easy		Essential			I prefer reading on a screen	I prefer the original hard copy		Yes	Sometimes (once a month)	Never or not available	Very frequently (daily)	Never or not available	Never or not available	Very frequently (daily)	Never or not available	Very frequently (daily)
4907079123									IUCN SSC member						Male	Infrequently		Not at all easy		Very important		Journal of Cetaceann Research and Management	I prefer printingÂ out to read	I prefer the original hard copy		No	Never or not available	Never or not available	Never or not available	Never or not available	Sometimes (once a month)	Sometimes (once a month)	Sometimes (once a month)	Infrequently	Sometimes (once a month)	Moderate positive effect		Slight negative impact
4907078886									IUCN SSC member					United States of America	Female	FrequentlyÂ (once a week)		Not easy	I have no direct access and must rely on asking colleagues to acquire publications for me.	Essential	I use scientific literature in species conservation planning and population viability analyses in my daily work, all IUCN-related.	Conservation Biology	I prefer printingÂ out to read	I prefer printingÂ out to read	Prefer downloading a PDF that I can print out, mark up, and reference periodically.	No	Infrequently	Never or not available	Never or not available	Never or not available	Infrequently	Never or not available	FrequentlyÂ (once a week)	FrequentlyÂ (once a week)	Frequently (once a week)	Moderate positive effect		Slight negative impact
4907060480									IUCN SSC member					China	Male	Infrequently		Not easy		Somewhat important						Yes	Sometimes (once a month)	Infrequently	Infrequently	Infrequently	Never or not available	Infrequently	Infrequently	Infrequently
4906958364										IUCN WCEL member				United States of America	Male	Infrequently		Easy		Very important			I prefer reading on a screen			Yes	Infrequently	Never or not available	Very frequently (daily)	Never or not available	Sometimes (once a month)	Never or not available	Never or not available	Infrequently
4906955843											IUCN WCPA member			Japan	Male	Sometimes (once a month)		Easy		Essential			I prefer reading on a screen	I prefer the original hard copy		Yes	FrequentlyÂ (once a week)	Infrequently	FrequentlyÂ (once a week)	FrequentlyÂ (once a week)	Infrequently	Infrequently	Infrequently	FrequentlyÂ (once a week)
4906955170				IUCN National NGO Member										China	Male	Sometimes (once a month)		Not easy		Very important			I prefer printingÂ out to read	I prefer reading on a screen		No	Infrequently	Never or not available	Never or not available	Never or not available	Sometimes (once a month)	Never or not available	Never or not available	Sometimes (once a month)		Moderate positive effect		Moderate negative impact
4906937858				IUCN National NGO Member					IUCN SSC member		IUCN WCPA member			Japan	Female	Infrequently		Not easy		Very important		Science	I prefer printingÂ out to read	I prefer the original hard copy		No	Sometimes (once a month)	Sometimes (once a month)	Never or not available	Never or not available	Never or not available	Sometimes (once a month)	Never or not available	Sometimes (once a month)	Sometimes (once a month)	Moderate positive effect		Slight negative impact
4906862678											IUCN WCPA member			Canada	Female	Sometimes (once a month)		Not at all easy		Very important		Science	I prefer reading on a screen	I prefer reading on a screen		Yes	Sometimes (once a month)	Never or not available	Never or not available	Never or not available	Infrequently	Never or not available	Sometimes (once a month)	FrequentlyÂ (once a week)
4906833233										IUCN WCEL member				Nepal	Male	Sometimes (once a month)		Easy		Very important		Environmental policy and law	I prefer reading on a screen	I prefer the original hard copy		No	Infrequently	Infrequently	Infrequently	Infrequently	Never or not available	Infrequently	Never or not available	Infrequently	Infrequently	Moderate positive effect		Great negative impact		None
4906812482												IUCN Secretariat staff		New Zealand	Female	FrequentlyÂ (once a week)		Easy		Essential		Herpetological Journal	I prefer reading on a screen	I prefer reading on a screen		Yes	Very frequently (daily)	Sometimes (once a month)	Very frequently (daily)	Never or not available	Infrequently	Never or not available	Sometimes (once a month)	Very frequently (daily)
4906808961											IUCN WCPA member			Gambia	Female	FrequentlyÂ (once a week)		Not easy	Internet access is very poor	Very important	Conduct research on environmental protection for the fishery spawning and nursery in an MPA	Science and Technology journals		I prefer printingÂ out to read	Where necessary books could be ok as well.	No	Sometimes (once a month)	Sometimes (once a month)	Sometimes (once a month)	Never or not available	Never or not available	FrequentlyÂ (once a week)	Never or not available	Very frequently (daily)	Very frequently (daily)	Great positive effect		Great negative impact		Is it possible to be receiving scientific literature (MPAs and fisheries)
4906732740									IUCN SSC member					Venezuela (Bolivarian Republic of)	Male	Sometimes (once a month)		Not easy	University librarles have cancelled or unable to pay subscriptions to scientific journals due to general economic deterioration. Internet connection velocity rates are the lowest in the region.	Essential		Zootaxa	I prefer reading on a screen	I prefer the original hard copy		Yes	Infrequently	Never or not available	Infrequently	Infrequently	Sometimes (once a month)	Never or not available	Sometimes (once a month)	FrequentlyÂ (once a week)
4906648262									IUCN SSC member					United States of America	Female	Sometimes (once a month)		Not easy	I am now retired and living in a rural area, with no access to academic libraries. I spend more time writing and begging colleagues or the librarian of my former institution to download pdfs, which often are not open access, than it takes to read the articles. Lack of access is a real hurdle! As more researchers publish papers as open access, I hope this will become less of a problem. I do mainta…	Essential	I try to keep up with the literature in my field still, but restricted access is a big hurdle. I am on the Marine Turtle SSC and many papers I need to access for my IUCN/SSC work can be obtained electronically, with credentialed access (which I no longer have).	Conserv Biol, Biol Conserv, Endang Spp Research and many others - not just one!	I prefer reading on a screen	I prefer the original hard copy	If I only need to read the abstract and skim the article to see if it is relevant, I prefer to do that electronically. However, if it is an article that I need to read thoroughly, I still prefer a hardcopy, but I'm willing to print that out myself given access to the pdf.	No	Never or not available	Never or not available	Never or not available	Never or not available	FrequentlyÂ (once a week)	Infrequently	FrequentlyÂ (once a week)	FrequentlyÂ (once a week)	Sometimes (once a month)	Great positive effect		Slight negative impact	I am reluctant to review SSC documents when I know that I will have to spend an inordinate amount of time begging colleagues and librarians to provide me the new, needed publications.	I think access to scientific literature is very important to the IUCN and I very much appreciate it that the need has been recognized and that this survey is occurring.
4906571969									IUCN SSC member					Portugal	Female	FrequentlyÂ (once a week)		Easy		Essential		Conservation Genetics	I prefer printingÂ out to read	I prefer printingÂ out to read		Yes	Never or not available	Never or not available	Very frequently (daily)	Never or not available	Sometimes (once a month)	Never or not available	Sometimes (once a month)	Very frequently (daily)						In my institution (MARE-ISPA, Portugal) we have free access to most of the journals of my interest. However, this access is not remote and, since I frequently work out of the office, it is less easy to get all the papers that I need.
4906324809				IUCN National NGO Member										Germany	Male	Infrequently		Easy		Very important		conservation related journals	I prefer printingÂ out to read	I prefer the original hard copy		Yes	Infrequently	Never or not available	Infrequently	Infrequently	Infrequently	Never or not available	Infrequently	Infrequently
4906322842												IUCN Secretariat staff		Jordan	Male	Very frequently (daily)		Not easy	Need to improve the regional scientific literature.	Very important	Our partners and stakeholders believes on IUCN knowledge and experience,so this thematic area should be the strongest feature.	Elsevier	I prefer the original hard copy	I prefer the original hard copy		No	Very frequently (daily)	Sometimes (once a month)	Sometimes (once a month)	Never or not available	Infrequently	Sometimes (once a month)	Sometimes (once a month)	Sometimes (once a month)	Frequently (once a week)	Great positive effect		Moderate negative impact
4906310359											IUCN WCPA member			United States of America	Male	Infrequently		Not easy	I work at a small college and our library resources are very modest.	Somewhat important		Journal of Wilderness Management	I prefer printingÂ out to read	I prefer the original hard copy		Yes	Sometimes (once a month)	Never or not available	Never or not available	Never or not available	Never or not available	Sometimes (once a month)	Never or not available	Very frequently (daily)						I wasn't aware of the IUCN Library or how it works.
4906309017									IUCN SSC member					United States of America		Very frequently (daily)		Easy	More recent literature is accessible through open-source websites, such as researchgate. I also have access through a University library system, however this my access will be expiring in a several months, after which it will become more difficult to obtain the literature I need to carry out my IUCN-related work.	Essential		Zootaxa	I prefer reading on a screen	I prefer reading on a screen		Yes	Infrequently	Never or not available	Very frequently (daily)	Never or not available	Sometimes (once a month)	Never or not available	Sometimes (once a month)	Very frequently (daily)
4906304459						IUCN CEC member								United States of America	Male	Infrequently		Easy		Not at all important			I prefer printingÂ out to read	I prefer the original hard copy		Yes	Never or not available	Never or not available	Never or not available	Never or not available	Never or not available	Never or not available	Never or not available	Never or not available
4906276221									IUCN SSC member					United States of America	Male	Infrequently		Easy		Very important		COPEIA	I prefer reading on a screen	I prefer the original hard copy		No	Never or not available	Infrequently	Infrequently	Never or not available	Infrequently	Sometimes (once a month)	Sometimes (once a month)	Infrequently	Sometimes (once a month)	Slight positive effect		Slight negative impact
4906223863										IUCN WCEL member				Indonesia	Male	Sometimes (once a month)		Not easy	trouble is in internet access.	Somewhat important	looking for definition of various scientific evidences in making of the judgement for environmental cases.	related with scientific evidence.	I prefer reading on a screen	I prefer the original hard copy		Yes	Sometimes (once a month)	Infrequently	FrequentlyÂ (once a week)	Never or not available	Never or not available	Never or not available	FrequentlyÂ (once a week)	Very frequently (daily)						No. Thank you
4906186212			IUCN International NGO Member											France	Female	Infrequently		Not easy		Essential		exotic pet medecine journal	I prefer reading on a screen	I prefer the original hard copy		Yes	FrequentlyÂ (once a week)	Infrequently	FrequentlyÂ (once a week)	Never or not available	FrequentlyÂ (once a week)	Never or not available	Very frequently (daily)	Very frequently (daily)
4906164447												IUCN Secretariat staff		Pakistan	Male	Infrequently		Not easy		Very important			I prefer reading on a screen	I prefer reading on a screen		No	Infrequently	Never or not available	Never or not available	Never or not available	Never or not available	Infrequently	Infrequently	Sometimes (once a month)	Infrequently	Great positive effect		Moderate negative impact
4906149808		IUCN Government Agency Member												Nigeria	Male	Very frequently (daily)		Easy		Essential		Marine Fisheries/conservation	I prefer reading on a screen	I prefer reading on a screen		Yes	FrequentlyÂ (once a week)	Infrequently	FrequentlyÂ (once a week)	Infrequently	Infrequently	Very frequently (daily)	Infrequently	Very frequently (daily)
4906139686									IUCN SSC member					Russian Federation	Male	Sometimes (once a month)
4906082829						IUCN CEC member								United Kingdom of Great Britain and Northern Ireland	Male	Infrequently		Not easy	I work at a â€˜newerâ€™ university that does not have an extensive library.	Very important		Environmental Education Research	I prefer printingÂ out to read	I prefer the original hard copy		Yes	Sometimes (once a month)	Infrequently	Never or not available	Never or not available	Infrequently	Infrequently	Infrequently	Sometimes (once a month)						This survey has raised my awareness of the IUCN library and prompted me to find out whether it might be useful to me in future.
4906069511									IUCN SSC member					United Kingdom of Great Britain and Northern Ireland	Male	Sometimes (once a month)		Not easy		Very important		Journal of Fish Biologyt	I prefer printingÂ out to read	I prefer the original hard copy		Yes	Sometimes (once a month)	Never or not available	Sometimes (once a month)	Never or not available	Never or not available	Never or not available	Infrequently	Sometimes (once a month)
4906022119	IUCN State Member		IUCN International NGO Member											Mexico	Male	FrequentlyÂ (once a week)		Not easy	Only online freely available journals	Essential		Marine Ecogy Progress Series	I prefer printingÂ out to read	I prefer printingÂ out to read		No	Infrequently	Never or not available	Never or not available	Never or not available	Infrequently	Never or not available	Infrequently	Sometimes (once a month)	Sometimes (once a month)	Great positive effect		Moderate negative impact
4906008341																Sometimes (once a month)		Not easy		Essential			I prefer reading on a screen	I prefer the original hard copy		Yes	Never or not available	Never or not available	Very frequently (daily)	Never or not available	Never or not available	Never or not available	Infrequently	Very frequently (daily)
4905985448									IUCN SSC member					Italy	Female	FrequentlyÂ (once a week)
4905976394									IUCN SSC member					United States of America	Male	FrequentlyÂ (once a week)		Easy		Essential		journal de Conchyliologie	I prefer reading on a screen	I prefer reading on a screen		Yes	FrequentlyÂ (once a week)	Infrequently	Very frequently (daily)	Infrequently	FrequentlyÂ (once a week)	FrequentlyÂ (once a week)	FrequentlyÂ (once a week)	FrequentlyÂ (once a week)
4905975159											IUCN WCPA member			Australia	Male	Sometimes (once a month)		Not easy	My institution does not subscribe to many journals and much of what I need is in the Grey literature	Very important			I prefer printingÂ out to read	I prefer the original hard copy		Yes	Infrequently	Never or not available	Never or not available	Never or not available	Sometimes (once a month)	Infrequently	Sometimes (once a month)	FrequentlyÂ (once a week)
4905957022											IUCN WCPA member			Canada	Male	Sometimes (once a month)
4905952043									IUCN SSC member					United States of America	Male	Sometimes (once a month)		Easy		Very important		Conservation Biology	I prefer printingÂ out to read	I prefer the original hard copy		Yes	Sometimes (once a month)	Never or not available	FrequentlyÂ (once a week)	Never or not available	Infrequently	Infrequently	Never or not available	Sometimes (once a month)
4905940348									IUCN SSC member					India	Male	FrequentlyÂ (once a week)
4905932657				IUCN National NGO Member										Syrian Arab Republic	Male	Infrequently		Not easy	no access to the literature due to distance and technical issues	Somewhat important		Parks	I prefer reading on a screen	I prefer printingÂ out to read		No	Infrequently	Infrequently	Never or not available	Never or not available	Never or not available	Sometimes (once a month)	Sometimes (once a month)	Sometimes (once a month)		Moderate positive effect		Moderate negative impact	show less credibility of work	no
4905925053		IUCN Government Agency Member		IUCN National NGO Member										Egypt	Male	Infrequently		Easy		Somewhat important			I prefer reading on a screen	I prefer printingÂ out to read		Yes	FrequentlyÂ (once a week)	Sometimes (once a month)	Sometimes (once a month)	Never or not available	Very frequently (daily)	FrequentlyÂ (once a week)	Very frequently (daily)	Very frequently (daily)
4905894365				IUCN National NGO Member										Hungary	Male	FrequentlyÂ (once a week)		Easy		Essential			I prefer reading on a screen	I prefer reading on a screen		No	Never or not available	Infrequently	Sometimes (once a month)	Never or not available	Infrequently	Never or not available	Infrequently	Very frequently (daily)	Frequently (once a week)	Moderate positive effect		Slight negative impact
4905742104									IUCN SSC member					Brazil	Male	Very frequently (daily)		Not at all easy	good periodics are expensive to be consultaded and my university give me restrict acess.	Essential		Ecology, TREEE,Ecology Methods, etc. Conservation Biology etc	I prefer printingÂ out to read	I prefer the original hard copy	I only print the most important papers ( 1 or 2 by week)	Yes	Sometimes (once a month)	Infrequently	Very frequently (daily)	Never or not available	Infrequently	Never or not available	Sometimes (once a month)	FrequentlyÂ (once a week)						no
4905730959				IUCN National NGO Member										Poland	Male	FrequentlyÂ (once a week)		Not easy	Unfortunately, to many scientific articles free on-line access is only to summaries. As for NGO it is to expensive to us to buy the free access to some on-line libraries.	Essential		Biological Conservation	I prefer reading on a screen	I prefer the original hard copy	For books ot depends - some time e-book is more usefull, if we don't need to read it whole but just find some information.	No	Sometimes (once a month)	Infrequently	Never or not available	Never or not available	Infrequently	Infrequently	Sometimes (once a month)	FrequentlyÂ (once a week)	Frequently (once a week)	Moderate positive effect		Slight negative impact
4905701219								IUCN CEM member						China	Male	FrequentlyÂ (once a week)		Not at all easy		Essential		conservation letters	I prefer reading on a screen			No	Never or not available	Never or not available	Never or not available	Never or not available	Infrequently	Never or not available	Never or not available	Very frequently (daily)	Sometimes (once a month)	Great positive effect		Great negative impact
4905683714								IUCN CEM member						United States of America	Female	Sometimes (once a month)		Very easy	Based at a university with access to many journals.	Very important			I prefer reading on a screen	I prefer reading on a screen		Yes	FrequentlyÂ (once a week)	Infrequently	FrequentlyÂ (once a week)	Never or not available	Infrequently	Never or not available	Infrequently	FrequentlyÂ (once a week)
4905671568				IUCN National NGO Member										Croatia	Male	Very frequently (daily)		Not easy	There is no access if you do not belong to some academic institution. NGOs can not afford the cost of literature.	Very important	I am doing spevies assessements and literature data is crucial.	Many	I prefer reading on a screen	I prefer reading on a screen		No	Sometimes (once a month)	Infrequently	Never or not available	Never or not available	FrequentlyÂ (once a week)	Never or not available	Infrequently	Very frequently (daily)	Frequently (once a week)	Great positive effect		Moderate negative impact		No
4905667336		IUCN Government Agency Member						IUCN CEM member	IUCN SSC member					South Africa	Female	Very frequently (daily)		Not easy	My organisation does not have the funds to purchase online subscriptions due to the exchange rate and state funding.	Essential	My role is to inform protected area managers to make the best science based decisions without literature this is impossible	Ecology and Environment	I prefer reading on a screen	I prefer reading on a screen		Yes	Never or not available	Never or not available	Very frequently (daily)	Never or not available	Sometimes (once a month)	Infrequently	Infrequently	FrequentlyÂ (once a week)						Implementing IUCN work in third word countries is extremely difficult given the costs involved
4905592796						IUCN CEC member								United States of America	Male	Sometimes (once a month)		Easy		Very important		there is not one journal - I consult a variety which is extremely important	I prefer printingÂ out to read	I prefer the original hard copy		No	Never or not available	Infrequently	Never or not available	Never or not available	Never or not available	Sometimes (once a month)	Never or not available	FrequentlyÂ (once a week)	Sometimes (once a month)	Great positive effect		Slight negative impact
4905505745									IUCN SSC member					United States of America	Male	Infrequently		Not easy		Somewhat important			I prefer printingÂ out to read	I prefer the original hard copy		No	Never or not available	Infrequently	Never or not available	Never or not available	Infrequently	Sometimes (once a month)	Infrequently	Sometimes (once a month)	Infrequently	Moderate positive effect		Slight negative impact
4905477792							IUCN CEESP member							Belgium	Male	Very frequently (daily)		Very easy		Essential		EIA Review	I prefer printingÂ out to read	I prefer the original hard copy		Yes	Infrequently	Never or not available	Very frequently (daily)	Never or not available	Sometimes (once a month)	Never or not available	Sometimes (once a month)	Sometimes (once a month)
4905477606								IUCN CEM member						Australia	Male	Sometimes (once a month)		Very easy	I have university library access to journals	Essential			I prefer printingÂ out to read	I prefer the original hard copy	I read on screen out of habit but prefer on paper.	Yes	FrequentlyÂ (once a week)	Infrequently	FrequentlyÂ (once a week)	Never or not available	Infrequently	Never or not available	Never or not available	Infrequently
4905472976													IUCN CEC MEMBER(PAST )	Fiji	Female	Sometimes (once a month)		Not easy	I have retired from full-time employment and do not have easy access to the Library and research facilities of The University of the South Pacific where I was employed.	Very important	It captures findings of international research and work with coverages over time and subjects and areas which are reliably comparative or of contrast in nature.		I prefer reading on a screen	I prefer printingÂ out to read		No	Infrequently	Infrequently	Never or not available	Never or not available	Never or not available	Never or not available	Sometimes (once a month)	Sometimes (once a month)	Sometimes (once a month)	Great positive effect	More efficient use of time because of easy access and one stop place for reliable and latest information.	Great negative impact	Creates dampening effect on getting on with the work at hand.	Difficulty in communicating with current Commission members in Oceania region on clarity of membership status.
4905471998									IUCN SSC member	IUCN WCEL member				China	Male	FrequentlyÂ (once a week)		Very easy	I have access to a good on-line library, but even I didn't, 95% of authors will respond to an email request for a pdf. So a Google Scholar search and email are all anyone needs.	Essential		Nature Climate Change	I prefer printingÂ out to read	I prefer the original hard copy		Yes	FrequentlyÂ (once a week)	Never or not available	FrequentlyÂ (once a week)	Never or not available	FrequentlyÂ (once a week)	Never or not available	Never or not available	FrequentlyÂ (once a week)						95% of authors will respond to an email request for a pdf, so anyone who has access to Google, Google Scholar and email has access to the literature.
4905465400									IUCN SSC member				SSG- MTSG Member	Malta	Female	Sometimes (once a month)		Not easy	But it depends on what exactly	Essential		scientific articles on turtles	I prefer printingÂ out to read	I prefer the original hard copy		No	Infrequently	Infrequently	Infrequently	Infrequently	Sometimes (once a month)	Sometimes (once a month)	Sometimes (once a month)	FrequentlyÂ (once a week)	Frequently (once a week)	Great positive effect		Moderate negative impact
4905455421									IUCN SSC member				Vice Chair, Primate Specialist Group	United Kingdom of Great Britain and Northern Ireland	Female	Very frequently (daily)		Not at all easy	I do not have an academic affiliation to supplement my SSC work, and therefore I have no access to literature that requires subscription for access.	Essential		Elsevier publications such as Biological Conservation	I prefer reading on a screen	I prefer reading on a screen		No	Never or not available	Never or not available	Never or not available	Never or not available	Sometimes (once a month)	Infrequently	FrequentlyÂ (once a week)	Very frequently (daily)	Very frequently (daily)	Great positive effect		Great negative impact
4905411434						IUCN CEC member					IUCN WCPA member			Serbia	Female	Sometimes (once a month)		Not easy	IUCN publication are accessible, but scientific articles and books are not	Very important		International Journal of Environmental and Science Education	I prefer reading on a screen	I prefer the original hard copy		Yes	Never or not available	Infrequently	Sometimes (once a month)	Infrequently	Infrequently	Sometimes (once a month)	Infrequently	FrequentlyÂ (once a week)
4905392887								IUCN CEM member						United Arab Emirates	Male	Sometimes (once a month)		Easy		Somewhat important		Biodiversity journals	I prefer reading on a screen	I prefer reading on a screen		Yes	FrequentlyÂ (once a week)	Never or not available	Very frequently (daily)	Never or not available	Infrequently	Never or not available	Sometimes (once a month)	Very frequently (daily)
4905388423									IUCN SSC member					Slovenia	Female	Sometimes (once a month)		Easy	On rare occasions when scientific literature is not accessible through my University library, I try contacting authors directly.	Very important		Human dimensions of wildlife management	I prefer printingÂ out to read	I prefer the original hard copy		Yes	Infrequently	Never or not available	FrequentlyÂ (once a week)	Never or not available	Sometimes (once a month)	Never or not available	Infrequently	FrequentlyÂ (once a week)
4905384215			IUCN International NGO Member											Kenya	Female	Sometimes (once a month)
4905379894								IUCN CEM member						Nigeria	Male	FrequentlyÂ (once a week)		Easy		Very important	This is because i use them in my Ph.D dissertation and also deep use it for my official report on wetland ecosystem and ecosystem services	Wetlands Ecology and Management - by Springer	I prefer printingÂ out to read			No	Infrequently	Infrequently	FrequentlyÂ (once a week)	FrequentlyÂ (once a week)	Infrequently	Sometimes (once a month)	Sometimes (once a month)	Very frequently (daily)	Very frequently (daily)	Great positive effect		Great negative impact
4905365539		IUCN Government Agency Member												Tanzania (United Republic of)	Male	Very frequently (daily)		Not easy	1. Poor internet connectivity 2. Limited knowledge of accessing and use of the journals	Essential		Agriculture, food and aqua, earth and environmental science, wildlife management, and ecology	I prefer printingÂ out to read	I prefer printingÂ out to read		No	Very frequently (daily)	Sometimes (once a month)	Never or not available	Never or not available	Never or not available	Infrequently	Sometimes (once a month)	FrequentlyÂ (once a week)	Very frequently (daily)	Great positive effect		Moderate negative impact		If we are granted access to IUCN scientific literature, i would suggest for you to highlight on the use of the online access methods and creating awareness of the users (College Library) Also if we can have means of monitoring usage statistics so that we can identify some areas that needs attention and promote further access to the online journals
4905355672											IUCN WCPA member			The Netherlands	Male	Sometimes (once a month)		Not easy		Somewhat important		Science	I prefer printingÂ out to read	I prefer printingÂ out to read		No	Infrequently	Sometimes (once a month)	Never or not available	Never or not available	Never or not available	Infrequently	Infrequently	Infrequently	Infrequently	Moderate positive effect		Moderate negative impact		no
4905340712					IUCN Affiliate Member									South Africa	Male	Sometimes (once a month)		Easy		Very important		Protect area management	I prefer reading on a screen	I prefer the original hard copy		Yes	Infrequently	Sometimes (once a month)	Infrequently	Never or not available	Never or not available	Infrequently	Sometimes (once a month)	Sometimes (once a month)
4905338811											IUCN WCPA member			Czech Republic	Male	Sometimes (once a month)		Not easy		Very important		Journal for Nature Conservation	I prefer reading on a screen	I prefer the original hard copy		No	Infrequently	Infrequently	Never or not available	Sometimes (once a month)	Infrequently	Sometimes (once a month)	Infrequently	Infrequently	Frequently (once a week)	Moderate positive effect		Moderate negative impact		no
4905327343											IUCN WCPA member			Syrian Arab Republic	Female	FrequentlyÂ (once a week)		Not easy	many scientific are either paid or should be entered from an authorized institution, this is not available in Syria.	Very important		http://www.sciencedirect.com/	I prefer reading on a screen	I prefer reading on a screen		No	Never or not available	Never or not available	Never or not available	Never or not available	Infrequently	FrequentlyÂ (once a week)	Sometimes (once a month)	FrequentlyÂ (once a week)	Frequently (once a week)	Moderate positive effect		Moderate negative impact
4905319689									IUCN SSC member		IUCN WCPA member			Angola	Female	FrequentlyÂ (once a week)		Easy		Very important		various	I prefer reading on a screen	I prefer the original hard copy		No	Never or not available	Never or not available	Never or not available	Never or not available	Infrequently	Infrequently	Infrequently	FrequentlyÂ (once a week)	Frequently (once a week)	Moderate positive effect		Slight negative impact
4905310783				IUCN National NGO Member										Cameroon	Male	Sometimes (once a month)		Not easy		Very important			I prefer the original hard copy	I prefer the original hard copy		No	Never or not available	Infrequently	Infrequently	Never or not available	Infrequently	Very frequently (daily)	Very frequently (daily)	Very frequently (daily)	Very frequently (daily)	Great positive effect		Moderate negative impact		no
4905288404												IUCN Secretariat staff		Bangladesh	Male	Sometimes (once a month)		Easy		Very important			I prefer the original hard copy	I prefer the original hard copy		Yes	Very frequently (daily)	Infrequently	Sometimes (once a month)	Infrequently	Sometimes (once a month)	Never or not available	Sometimes (once a month)	Sometimes (once a month)
4905285155											IUCN WCPA member			Uganda	Male	Very frequently (daily)		Not easy		Essential		Journal on Protected Areas	I prefer reading on a screen	I prefer reading on a screen		No	Infrequently	Sometimes (once a month)	FrequentlyÂ (once a week)	Never or not available	Sometimes (once a month)	Never or not available	Infrequently	Very frequently (daily)	Very frequently (daily)	Great positive effect		Slight negative impact		Not applicable
4905252067			IUCN International NGO Member						IUCN SSC member					United Kingdom of Great Britain and Northern Ireland	Female	FrequentlyÂ (once a week)		Very easy	We have honorary staff status at our local university so have access to their physical and electronic library resources. However this only applies to a small number of our staff (ie not organisation wide), others find it more difficult	Essential		I have access to all needed	I prefer reading on a screen	I prefer reading on a screen		Yes	Infrequently	Never or not available	FrequentlyÂ (once a week)	Never or not available	Infrequently	Never or not available	Infrequently	FrequentlyÂ (once a week)						I know lack of literature access is a big problem for many people in my own and similar organisations -we are lucky to have it via university affiliation but many do not and increased access for all it very important
4905244955	IUCN State Member			IUCN National NGO Member										Comoros	Male	Sometimes (once a month)		Not easy		Very important		NA	I prefer reading on a screen	I prefer printingÂ out to read		Yes	Sometimes (once a month)	FrequentlyÂ (once a week)	Sometimes (once a month)	Never or not available	Infrequently	Never or not available	Infrequently	Never or not available						NA
4905238336									IUCN SSC member		IUCN WCPA member			India	Male	Infrequently		Easy		Essential		Difficult to say	I prefer reading on a screen	I prefer the original hard copy		No	Never or not available	Never or not available	Never or not available	Never or not available	FrequentlyÂ (once a week)	Never or not available	Never or not available	Very frequently (daily)	Very frequently (daily)	Great positive effect		Great negative impact		No
4905236329									IUCN SSC member					Rwanda	Male	Sometimes (once a month)		Not easy		Very important		MANY, NOT ONE	I prefer reading on a screen	I prefer reading on a screen		No	Never or not available	Never or not available	Never or not available	Infrequently	FrequentlyÂ (once a week)	Never or not available	FrequentlyÂ (once a week)	FrequentlyÂ (once a week)	Frequently (once a week)	Great positive effect		Moderate negative impact		no
4905235375	IUCN State Member	IUCN Government Agency Member	IUCN International NGO Member	IUCN National NGO Member										Nepal	Male	FrequentlyÂ (once a week)		Not easy		Essential			I prefer reading on a screen	I prefer reading on a screen		No	Sometimes (once a month)	Sometimes (once a month)	Sometimes (once a month)	Sometimes (once a month)	Sometimes (once a month)	Sometimes (once a month)	Sometimes (once a month)	Sometimes (once a month)		Slight positive effect		Slight negative impact
4905234921									IUCN SSC member					France	Male	Infrequently
4905218364				IUCN National NGO Member										Azerbaijan	Male	Very frequently (daily)		Not easy	problem isliterature which absent in Internet. Access is difficult. No good libraries in country.	Essential		IBIs	I prefer reading on a screen	I prefer reading on a screen		No	Sometimes (once a month)	Never or not available	Never or not available	Never or not available	FrequentlyÂ (once a week)	Never or not available	Never or not available	Very frequently (daily)	Frequently (once a week)	Moderate positive effect		Moderate negative impact		No
4905217559									IUCN SSC member					Austria	Male	Very frequently (daily)		Easy		Essential		no problems with access	I prefer printingÂ out to read	I prefer the original hard copy		Yes	Very frequently (daily)	Never or not available	Very frequently (daily)	Never or not available	Never or not available	FrequentlyÂ (once a week)	Very frequently (daily)	Very frequently (daily)
4905216941			IUCN International NGO Member											Mauritius	Male	FrequentlyÂ (once a week)
4905214414									IUCN SSC member					Germany	Male	Very frequently (daily)		Easy		Essential		No specific one	I prefer reading on a screen	I prefer the original hard copy		Yes	Infrequently	Never or not available	Very frequently (daily)	Never or not available	Sometimes (once a month)	Infrequently	Sometimes (once a month)	FrequentlyÂ (once a week)
4905197910									IUCN SSC member					Tunisia	Male	FrequentlyÂ (once a week)		Easy		Very important			I prefer reading on a screen	I prefer the original hard copy		Yes	Infrequently	Never or not available	Sometimes (once a month)	Never or not available	Sometimes (once a month)	Never or not available	Infrequently	Sometimes (once a month)
4905195667									IUCN SSC member					Bulgaria	Male	Very frequently (daily)
4905186169																FrequentlyÂ (once a week)
4905172270									IUCN SSC member					Rwanda	Male	Sometimes (once a month)		Easy		Very important		Parks Journal	I prefer reading on a screen	I prefer reading on a screen		Yes	Infrequently	Infrequently	Never or not available	Never or not available	Infrequently	Infrequently	Infrequently	FrequentlyÂ (once a week)						No
4905167432													non member but access materials when need be	South Africa	Female	Sometimes (once a month)		Easy		Very important			I prefer reading on a screen	I prefer reading on a screen		Yes	Sometimes (once a month)	Never or not available	FrequentlyÂ (once a week)	Never or not available	Sometimes (once a month)	Never or not available	FrequentlyÂ (once a week)	Very frequently (daily)
4905164353									IUCN SSC member					Australia	Female	Sometimes (once a month)		Not easy	I have to pay to access papers online.	Very important			I prefer printingÂ out to read			No	Sometimes (once a month)	Never or not available	Never or not available	Never or not available	Infrequently	Never or not available	FrequentlyÂ (once a week)	Very frequently (daily)	Sometimes (once a month)	Great positive effect		Moderate negative impact
4905164300									IUCN SSC member					Poland	Female	FrequentlyÂ (once a week)		Easy	I am using University access	Essential		There is no one a few about conservation	I prefer reading on a screen	I prefer reading on a screen		Yes	FrequentlyÂ (once a week)	Infrequently	FrequentlyÂ (once a week)	Never or not available	Infrequently	Infrequently	Never or not available	Sometimes (once a month)
4905161768									IUCN SSC member					Cameroon	Male	Sometimes (once a month)		Not easy		Somewhat important		Science	I prefer reading on a screen			Yes	Never or not available	Never or not available	Sometimes (once a month)	Never or not available	Never or not available	Never or not available	Sometimes (once a month)	Sometimes (once a month)
4905140386									IUCN SSC member					Venezuela (Bolivarian Republic of)	Male	Very frequently (daily)		Easy		Essential		PLos One	I prefer reading on a screen	I prefer printingÂ out to read		Yes	Very frequently (daily)	FrequentlyÂ (once a week)	Very frequently (daily)	Infrequently	Sometimes (once a month)	Infrequently	Infrequently	Very frequently (daily)
4905137156									IUCN SSC member					United States of America	Male	FrequentlyÂ (once a week)		Easy		Essential		Endangered Species Research	I prefer printingÂ out to read	I prefer the original hard copy		Yes	FrequentlyÂ (once a week)	Never or not available	FrequentlyÂ (once a week)	Infrequently	Sometimes (once a month)	Never or not available	Sometimes (once a month)	FrequentlyÂ (once a week)
4905135154												IUCN Secretariat staff		Switzerland	Male	Very frequently (daily)
4905127167									IUCN SSC member					Finland	Male	Infrequently		Easy		Somewhat important		canÂ´t say	I prefer reading on a screen	I prefer printingÂ out to read		No	Infrequently	Sometimes (once a month)	Infrequently	Infrequently	Infrequently	Infrequently	Infrequently	Sometimes (once a month)	Infrequently	Slight positive effect		No impact at all		no
4905122609									IUCN SSC member				IUCN SSC Member	Congo (Democratic Republic of the)	Male	Sometimes (once a month)
4905106304						IUCN CEC member		IUCN CEM member	IUCN SSC member		IUCN WCPA member			India	Male	FrequentlyÂ (once a week)		Easy		Essential		WWF, IUCN related literature, Journal of Ecosystem	I prefer reading on a screen	I prefer reading on a screen		Yes	Sometimes (once a month)	Infrequently	Very frequently (daily)	Infrequently	Very frequently (daily)	Infrequently	Sometimes (once a month)	Sometimes (once a month)
4905105614				IUCN National NGO Member										India	Male	FrequentlyÂ (once a week)		Easy		Very important			I prefer reading on a screen	I prefer the original hard copy		Yes	FrequentlyÂ (once a week)	Never or not available	Infrequently	Never or not available	Never or not available	Never or not available	Infrequently	Sometimes (once a month)
4905101314											IUCN WCPA member			Rwanda	Male	Sometimes (once a month)		Easy		Very important		Accelerated modern humanâ€“induced species losses	I prefer the original hard copy			No	Never or not available	Sometimes (once a month)	Never or not available	Infrequently	Never or not available	FrequentlyÂ (once a week)	Sometimes (once a month)	Very frequently (daily)	Frequently (once a week)	Moderate positive effect		Moderate negative impact
4905098928									IUCN SSC member					Malaysia	Female	Infrequently		Not at all easy		Somewhat important			I prefer the original hard copy	I prefer the original hard copy		No	Never or not available	Never or not available	Never or not available	Never or not available	Infrequently	Never or not available	Never or not available	Infrequently	Sometimes (once a month)	Slight positive effect		Slight negative impact
4905097065											IUCN WCPA member			Australia	Female	Sometimes (once a month)		Not easy		Essential			I prefer the original hard copy	I prefer the original hard copy		No	Sometimes (once a month)	Sometimes (once a month)	Sometimes (once a month)	Never or not available	Infrequently	Never or not available	Infrequently	Infrequently	Sometimes (once a month)	Moderate positive effect		Slight negative impact
4905094216			IUCN International NGO Member						IUCN SSC member					Brazil	Female	FrequentlyÂ (once a week)		Not easy	Difficulty in getting access to non-open access lit	Very important		Science	I prefer reading on a screen			Yes	Sometimes (once a month)	Never or not available	Very frequently (daily)	Sometimes (once a month)	FrequentlyÂ (once a week)	Sometimes (once a month)	Infrequently	Very frequently (daily)
4905091313									IUCN SSC member					Sweden	Male	FrequentlyÂ (once a week)		Not easy		Essential		ICES Journal of Marine Science	I prefer reading on a screen	I prefer the original hard copy		No	Never or not available	Infrequently	Never or not available	Never or not available	FrequentlyÂ (once a week)	Never or not available	FrequentlyÂ (once a week)	Very frequently (daily)	Frequently (once a week)	Great positive effect		Moderate negative impact
4905089078				IUCN National NGO Member										India	Male	Sometimes (once a month)		Not easy		Very important			I prefer reading on a screen	I prefer the original hard copy		No	FrequentlyÂ (once a week)	FrequentlyÂ (once a week)	Never or not available	Never or not available	Infrequently	Infrequently	FrequentlyÂ (once a week)	Very frequently (daily)	Frequently (once a week)	Great positive effect		Moderate negative impact
4905085062										IUCN WCEL member				Japan	Male	Very frequently (daily)		Easy		Essential		there are various journals very relevant to my work	I prefer reading on a screen	I prefer the original hard copy		Yes	Infrequently	Never or not available	FrequentlyÂ (once a week)	Never or not available	Sometimes (once a month)	FrequentlyÂ (once a week)	FrequentlyÂ (once a week)	FrequentlyÂ (once a week)
4905077907									IUCN SSC member					Madagascar	Male	Infrequently
4905077393							IUCN CEESP member		IUCN SSC member					Madagascar	Male	Very frequently (daily)		Not at all easy	Limited number of libraries of poor quality in country. So I have to use the net and ask contacts in Universities elsewhere to assist me to get online publications. Payment online is also very restrictive for two reason: 1. the cost and 2. never sure if the specific publication is useful until you have paid for the whole doc.	Very important	I was editing Policy Matters and it was important for that and could be again	Please consuider a range anthropology to environmental management	I prefer printingÂ out to read	I prefer printingÂ out to read		No	Never or not available	Infrequently	Never or not available	Never or not available	Infrequently	Never or not available	Very frequently (daily)	Very frequently (daily)	Very frequently (daily)	Great positive effect		Moderate negative impact		Great if IUCN could link up with an institution who could give members access to literature in their libraries and to online journals etc.
4905066794														Uganda	Female	Infrequently
4905053366	IUCN State Member													Oman	Male	Infrequently		Easy		Somewhat important			I prefer reading on a screen			Yes	Infrequently	Infrequently	Infrequently	Never or not available	Infrequently	Never or not available	Never or not available	Very frequently (daily)						no
4905051929									IUCN SSC member					Bangladesh	Female	Infrequently
4905050090											IUCN WCPA member			South Africa	Male	FrequentlyÂ (once a week)		Not easy	I mainly receive newsletter and information from the website.	Essential	If there was a way that I could have easy access to the most recent scientific literature or access to a database of scientific literature it would assist greatly in integrating IUCN science into conservation practice as far as possible in the Western Cape of South Africa. We should be making more use of IUCN knowledge to implement conservation actions based on priorities and threats.	Biodiversity and Conservation	I prefer the original hard copy	I prefer reading on a screen		No	Never or not available	Never or not available	Never or not available	Never or not available	Never or not available	Sometimes (once a month)	FrequentlyÂ (once a week)	Very frequently (daily)	Sometimes (once a month)	Great positive effect	To will enable me to have access to a broad knowledge base and use it to implemnet conservation action that are of an international standard. Of particular importance is that the IUCN understands conservation in the African context.	Moderate negative impact		The biggest challenge is to align the IUCN conservation standards with local conservation strategies.
4905045608									IUCN SSC member					Malaysia	Female	Sometimes (once a month)		Not easy	our library has limited resources	Very important	Good documentation by IUCN	books	I prefer reading on a screen	I prefer reading on a screen		Yes	FrequentlyÂ (once a week)	Infrequently	FrequentlyÂ (once a week)	Infrequently	Sometimes (once a month)	Infrequently	Infrequently	FrequentlyÂ (once a week)						Time has change, information now on digital form, but we still prefer hard copy / printed materials
4905041639									IUCN SSC member					Peru	Male	FrequentlyÂ (once a week)		Not easy	I need full access to Database such as HINARI, and/or works from Nature, Science, Evolution, Cladistics, Conservation Biology, Systematic Biology, Copeia, Chromosome and similars. Is very expensive for me to buy some papers and books.	Essential		Evolution	I prefer printingÂ out to read	I prefer the original hard copy		Yes	FrequentlyÂ (once a week)	FrequentlyÂ (once a week)	Very frequently (daily)	Never or not available	Sometimes (once a month)	Never or not available	FrequentlyÂ (once a week)	Very frequently (daily)						Please, I hope that UICN help me in this issue.
4905040905											IUCN WCPA member			Belarus	Male	Infrequently		Not easy		Somewhat important			I prefer printingÂ out to read			No	FrequentlyÂ (once a week)	Infrequently	Infrequently	Never or not available	Infrequently	Infrequently	Infrequently	Infrequently	Infrequently	Slight positive effect		Slight negative impact
4905035920									IUCN SSC member					Australia	Male	Sometimes (once a month)		Easy	Have access to network of people, and webb search engines	Very important			I prefer reading on a screen			Yes	Infrequently	Never or not available	Infrequently	Never or not available	Sometimes (once a month)	FrequentlyÂ (once a week)	Sometimes (once a month)	FrequentlyÂ (once a week)						As office of CSG Crocodile Specialist Group, we quite often provide publications to members looking for them.
4905035673									IUCN SSC member					Bhutan	Male	FrequentlyÂ (once a week)		Not easy		Somewhat important		IUCN eJournal - Env. Acad. Law	I prefer reading on a screen			No	FrequentlyÂ (once a week)	Infrequently	Sometimes (once a month)	Never or not available	Sometimes (once a month)	Never or not available	FrequentlyÂ (once a week)	Very frequently (daily)	Frequently (once a week)	Moderate positive effect	Mostly for tertiary education purpose	Slight negative impact
4905032930									IUCN SSC member					Germany		FrequentlyÂ (once a week)		Not easy		Essential		The Journal of Wildlife Management	I prefer reading on a screen	I prefer reading on a screen		No	Never or not available	Infrequently	Never or not available	Never or not available	Infrequently	Sometimes (once a month)	Sometimes (once a month)	FrequentlyÂ (once a week)	Frequently (once a week)	Great positive effect		Great negative impact
4905031210									IUCN SSC member		IUCN WCPA member			United Arab Emirates	Male	FrequentlyÂ (once a week)		Easy		Very important		RDB-related	I prefer reading on a screen	I prefer reading on a screen		No	Never or not available	Never or not available	Never or not available	Never or not available	Never or not available	Never or not available	Never or not available	FrequentlyÂ (once a week)	Infrequently	Slight positive effect		Slight negative impact
4905030316									IUCN SSC member					Canada	Male	Sometimes (once a month)
4905029565			IUCN International NGO Member	IUCN National NGO Member					IUCN SSC member					India	Male	Very frequently (daily)		Not easy	Obtain mainly through Specialist Group network members and also from the RedList publication	Essential			I prefer reading on a screen	I prefer reading on a screen		No	FrequentlyÂ (once a week)	Infrequently	Never or not available	Never or not available	FrequentlyÂ (once a week)	Sometimes (once a month)	FrequentlyÂ (once a week)	Very frequently (daily)	Very frequently (daily)	Great positive effect	This will definitely improve to get more information that will help us to do the Red List species assessment.	Slight negative impact
4905005489								IUCN CEM member			IUCN WCPA member			Canada	Male	FrequentlyÂ (once a week)		Easy	Am an academic so have access to most documents via university library	Very important		Environmental Management	I prefer reading on a screen	I prefer the original hard copy		Yes	Very frequently (daily)	Sometimes (once a month)	FrequentlyÂ (once a week)	Never or not available	Infrequently	Sometimes (once a month)	Infrequently	Sometimes (once a month)
4905001130		IUCN Government Agency Member												Philippines	Female	Sometimes (once a month)		Not easy	I am a former librarian so more or less I can easily locate the book/subject I am searching. But I have not yet done some research works.	Very important	As a member each one of us must be particular with the on goings of the membership we are in. It is also important that what you will be researching will be what can be found in the library	magazine with no particular titel	I prefer the original hard copy	I prefer the original hard copy	It is easy for me to go back to where I want to read more.	No	Sometimes (once a month)	Sometimes (once a month)	Sometimes (once a month)	Infrequently	Infrequently	Infrequently	Infrequently	Infrequently	Sometimes (once a month)	Moderate positive effect	At least the research you are doing are supported by readings prepared/searched by IUCN members or representatives	Slight negative impact	The literature that you are seaching might be incomplete as compared to what you will offer	The books, documents, must be properly number or tagged by number or letters and arranged either chronologicall, alphabetically and by subject matter
4904997339							IUCN CEESP member							Indonesia	Male	FrequentlyÂ (once a week)		Easy		Essential		journal of forest management	I prefer the original hard copy	I prefer the original hard copy		No	Very frequently (daily)	Infrequently	FrequentlyÂ (once a week)	Never or not available	Infrequently	Sometimes (once a month)	Very frequently (daily)	Very frequently (daily)	Frequently (once a week)	Great positive effect		Great negative impact
4904987601												IUCN Secretariat staff		Guatemala	Male	Infrequently		Not easy		Very important		red list		I prefer reading on a screen		No	Infrequently	Never or not available	Infrequently	Infrequently	FrequentlyÂ (once a week)	Never or not available	Never or not available	Very frequently (daily)	Frequently (once a week)	Great positive effect		Great negative impact
4904976432								IUCN CEM member						India	Male	FrequentlyÂ (once a week)		Easy		Somewhat important			I prefer the original hard copy			Yes	Sometimes (once a month)	Infrequently	Very frequently (daily)	Never or not available	Sometimes (once a month)	Infrequently	Never or not available	FrequentlyÂ (once a week)
4904974910									IUCN SSC member					China	Male	Sometimes (once a month)		Easy		Very important			I prefer printingÂ out to read	I prefer printingÂ out to read		Yes	Infrequently	Sometimes (once a month)	Sometimes (once a month)	Infrequently	Infrequently	Infrequently	Infrequently	Sometimes (once a month)
4904969061								IUCN CEM member			IUCN WCPA member			Canada	Male	Infrequently		Easy	Costs are a deterent.	Somewhat important			I prefer printingÂ out to read	I prefer the original hard copy		Yes	Infrequently	Infrequently	Infrequently	Never or not available	Never or not available	Never or not available	Infrequently	Sometimes (once a month)						I didn't know the iucn library provides access to journal articles. Is there a fee? Some outreach could be helpful.
4904949170						IUCN CEC member		IUCN CEM member						Sri Lanka	Male	Never
4904948024											IUCN WCPA member			Cambodia	Female	Sometimes (once a month)		Easy	The scientific literature helps me to understand what works or what does not work in natural resource conservation issues.	Very important			I prefer reading on a screen	I prefer reading on a screen		Yes	Never or not available	Sometimes (once a month)	FrequentlyÂ (once a week)	Never or not available	Never or not available	Sometimes (once a month)	Sometimes (once a month)	FrequentlyÂ (once a week)
4904945462									IUCN SSC member					Swaziland	Female	Sometimes (once a month)		Not at all easy		Very important			I prefer reading on a screen	I prefer reading on a screen		No	Never or not available	Never or not available	Never or not available	Never or not available	Sometimes (once a month)	Infrequently	Infrequently	FrequentlyÂ (once a week)	Sometimes (once a month)	Great positive effect		Moderate negative impact
4904937899									IUCN SSC member					Portugal	Male	FrequentlyÂ (once a week)		Not easy		Very important		Biol. Conserv	I prefer reading on a screen			Yes	Infrequently	Never or not available	Very frequently (daily)	Infrequently	FrequentlyÂ (once a week)	Never or not available	Sometimes (once a month)	Very frequently (daily)
4904935549									IUCN SSC member					South Africa	Male	Sometimes (once a month)		Easy		Very important		Kew Bulletin	I prefer the original hard copy			No	FrequentlyÂ (once a week)	Infrequently	Never or not available	Never or not available	Never or not available	Never or not available	Infrequently	Sometimes (once a month)	Infrequently	Moderate positive effect		Slight negative impact
4904933206									IUCN SSC member					Sierra Leone	Male	Very frequently (daily)		Easy	Through the IUCN website	Essential		Journal on Species conservation	I prefer reading on a screen	I prefer reading on a screen		No	Very frequently (daily)	Never or not available	Never or not available	Never or not available	Never or not available	Never or not available	Infrequently	Very frequently (daily)	Very frequently (daily)	Great positive effect	#NAME?	Moderate negative impact	- not able to read about others' achievements and experiences
4904932240		IUCN Government Agency Member												Bangladesh	Male	FrequentlyÂ (once a week)		Easy		Very important			I prefer the original hard copy	I prefer the original hard copy		No	Sometimes (once a month)	Sometimes (once a month)	Sometimes (once a month)	Sometimes (once a month)	Sometimes (once a month)	Sometimes (once a month)	Sometimes (once a month)	Sometimes (once a month)	Sometimes (once a month)	Great positive effect		Moderate negative impact		N/A
4904930329									IUCN SSC member					Indonesia	Male	Infrequently		Easy		Very important		about tomistoma conservation	I prefer reading on a screen	I prefer reading on a screen		Yes	Infrequently	Never or not available	Infrequently	Never or not available	Never or not available	Infrequently	Infrequently	Very frequently (daily)
4904929583	IUCN State Member													Pakistan	Male	Sometimes (once a month)		Not easy		Somewhat important			I prefer reading on a screen	I prefer printingÂ out to read		No	Infrequently	Never or not available	Never or not available	Never or not available	Never or not available	Never or not available	Infrequently	Infrequently	Sometimes (once a month)	Moderate positive effect		No impact at all
4904906270	IUCN State Member														Male	Very frequently (daily)		Not easy		Essential		Journal of Biological Conservation	I prefer reading on a screen	I prefer reading on a screen		No	FrequentlyÂ (once a week)	Infrequently	Never or not available	Never or not available	Sometimes (once a month)	FrequentlyÂ (once a week)	Never or not available	FrequentlyÂ (once a week)	Very frequently (daily)	Great positive effect		Moderate negative impact
4904890634									IUCN SSC member					Madagascar	Male	Infrequently		Not easy		Somewhat important			I prefer reading on a screen			No	Very frequently (daily)	Infrequently	Sometimes (once a month)	Never or not available	Infrequently	Infrequently	Infrequently	Infrequently	Sometimes (once a month)	Moderate positive effect		Moderate negative impact
4904855195									IUCN SSC member		IUCN WCPA member			Sao Tome and Principe	Male	FrequentlyÂ (once a week)		Easy		Essential		I don't know	I prefer reading on a screen	I prefer the original hard copy		Yes	Sometimes (once a month)	Never or not available	Sometimes (once a month)	Never or not available	Sometimes (once a month)	Infrequently	Sometimes (once a month)	FrequentlyÂ (once a week)
4904850374									IUCN SSC member					Malaysia	Male	Sometimes (once a month)		Easy		Very important			I prefer printingÂ out to read	I prefer reading on a screen		No	Sometimes (once a month)	Never or not available	Infrequently	Never or not available	Never or not available	Never or not available	Sometimes (once a month)	FrequentlyÂ (once a week)	Frequently (once a week)	Great positive effect		Slight negative impact		Nope
4904849496			IUCN International NGO Member											Lao People's Democratic Republic	Female	Sometimes (once a month)		Not easy		Very important		Biodiversity	I prefer printingÂ out to read	I prefer reading on a screen		No	Infrequently	Infrequently	Sometimes (once a month)	Infrequently	Infrequently	Infrequently	Sometimes (once a month)	Sometimes (once a month)	Sometimes (once a month)	Moderate positive effect		Moderate negative impact		no
4904847356						IUCN CEC member								China	Female	Sometimes (once a month)
4904846720											IUCN WCPA member			United States of America	Male	Infrequently		Not at all easy		Very important		International Journal of Wilderness by the WILD Foundation	I prefer printingÂ out to read	I prefer the original hard copy		No	Never or not available	Infrequently	Never or not available	Sometimes (once a month)	Never or not available	FrequentlyÂ (once a week)	Infrequently	Very frequently (daily)	Infrequently	Moderate positive effect		Slight negative impact
4904839593								IUCN CEM member			IUCN WCPA member			United States of America	Female	FrequentlyÂ (once a week)		Not easy	I am not part of a research institute anymore, so no access to scientific database.	Very important			I prefer reading on a screen	I prefer reading on a screen		No	Infrequently	Infrequently	Sometimes (once a month)	Never or not available	Sometimes (once a month)	Never or not available	FrequentlyÂ (once a week)	Very frequently (daily)	Frequently (once a week)	Great positive effect		Moderate negative impact	I am accessing the scientific literature through friends/colleagues that have access, but this is very inconvenient and not comfortable.
4904832225									IUCN SSC member					China	Male	Sometimes (once a month)		Easy		Somewhat important			I prefer reading on a screen	I prefer the original hard copy		Yes	Sometimes (once a month)	Never or not available	Sometimes (once a month)	Never or not available	Infrequently	Never or not available	Never or not available	Sometimes (once a month)
4904812947							IUCN CEESP member							Turkey	Male	FrequentlyÂ (once a week)		Easy		Essential		Frontiers in ecology and environment, Bioscience, TREE, Conservation Biology, Nature, Nature Climate	I prefer reading on a screen	I prefer the original hard copy		Yes	Never or not available	Never or not available	FrequentlyÂ (once a week)	Never or not available	Never or not available	Never or not available	Infrequently	FrequentlyÂ (once a week)
4904792103									IUCN SSC member					United States of America	Female	Sometimes (once a month)		Not easy		Very important			I prefer the original hard copy	I prefer the original hard copy	prefer hard copy, but am getting used to reading on screen and understand it is more efficient and economical	No	Never or not available	Infrequently	Never or not available	Never or not available	FrequentlyÂ (once a week)	FrequentlyÂ (once a week)	FrequentlyÂ (once a week)	Very frequently (daily)	Sometimes (once a month)	Great positive effect		Moderate negative impact		thanks
4904787257								IUCN CEM member						Tuvalu	Female	FrequentlyÂ (once a week)		Not at all easy	Poor internet is part of the problem, but the real stopper is not having access to library services that allow searching and downloading published literature. It is possible to buy individual papers, but they typically cost $35 USD each and I would need many of them to research a single topic.	Essential	Supporting data are critical for any kind of analysis of issues. Impossible to contribute to any discussions without knowing the latest research.	There is not just one.	I prefer reading on a screen	I prefer reading on a screen		No	Never or not available	Never or not available	Sometimes (once a month)	Never or not available	Infrequently	Never or not available	Sometimes (once a month)	Very frequently (daily)	Frequently (once a week)	Great positive effect	Only way to keep up to date on critical issues. Not just unpublished reports which are relatively easy to get online, but the scientific research needed to support analysis.	Great negative impact	Forced to rely mostly on unpublished reports. These have a role, but they cannot be the only source of information.	Access to the published literature would be a huge service to anyone trying to work in the field of conservation. This is especially true of people living in developing countries for who access is virtually impossible.
4904770345									IUCN SSC member					Canada	Male	Very frequently (daily)		Very easy	Access to university library and online resources (i.e., journals).	Essential		Conservation Biology	I prefer reading on a screen	I prefer the original hard copy		Yes	Very frequently (daily)	Infrequently	Very frequently (daily)	Never or not available	Infrequently	Infrequently	Never or not available	Infrequently						I have excellent access to scientific materials. I also try to make some available to colleagues with less access but it is on a case-by-case basis.
4904769941		IUCN Government Agency Member												Australia	Male	Sometimes (once a month)
4904769301									IUCN SSC member					Canada	Female	FrequentlyÂ (once a week)		Very easy	my university is part of a university network that provides excellent access to a very extensive library or print and electronic publications. I can access these easily overseas, so I have almost continuous access to the scientific literature relevant to my IUCN work.	Very important		American Journal of Primatology	I prefer reading on a screen	I prefer reading on a screen		Yes	FrequentlyÂ (once a week)	Infrequently	FrequentlyÂ (once a week)	Infrequently	Infrequently	Never or not available	Infrequently	FrequentlyÂ (once a week)						Any system that would improve accessibility to scientific literature for people living in habitat states (primates, in my case) would be a major boon.
4904769206								IUCN CEM member						India	Male	FrequentlyÂ (once a week)		Very easy	IUCN website is very much user-friendly	Essential		Journal of Applied Ecology	I prefer printingÂ out to read	I prefer reading on a screen		Yes	FrequentlyÂ (once a week)	Infrequently	FrequentlyÂ (once a week)	Infrequently	FrequentlyÂ (once a week)	Never or not available	Infrequently	Very frequently (daily)						IUCN can organise online training courses using its manuals
4904745167									IUCN SSC member					China	Male	Infrequently		Easy		Essential		many	I prefer reading on a screen	I prefer the original hard copy		Yes	FrequentlyÂ (once a week)	Infrequently	FrequentlyÂ (once a week)	Never or not available	Infrequently	Infrequently	Infrequently	FrequentlyÂ (once a week)						No.
4904731614	IUCN State Member	IUCN Government Agency Member	IUCN International NGO Member						IUCN SSC member					Malaysia	Male	Infrequently
4904697261								IUCN CEM member						Korea (Republic of)	Male	Sometimes (once a month)		Easy		Very important		Conservation Biology	I prefer reading on a screen	I prefer reading on a screen		No	Never or not available	Never or not available	Never or not available	Never or not available	Infrequently	Infrequently	FrequentlyÂ (once a week)	FrequentlyÂ (once a week)	Frequently (once a week)	Moderate positive effect		Slight negative impact
4904696882							IUCN CEESP member	IUCN CEM member			IUCN WCPA member			Australia	Male	FrequentlyÂ (once a week)		Not easy		Very important		ecology and society	I prefer printingÂ out to read	I prefer reading on a screen		Yes	FrequentlyÂ (once a week)	Never or not available	Never or not available	Never or not available	Never or not available	Never or not available	Sometimes (once a month)	Sometimes (once a month)
4904686759									IUCN SSC member					Australia	Female	Sometimes (once a month)		Not easy		Essential		JEMBE	I prefer reading on a screen			No	Never or not available	Never or not available	Never or not available	Never or not available	Sometimes (once a month)	Never or not available	FrequentlyÂ (once a week)	FrequentlyÂ (once a week)	Frequently (once a week)	Great positive effect		Moderate negative impact
4904679237				IUCN National NGO Member										United States of America	Male	Sometimes (once a month)		Not easy		Somewhat important		Science	I prefer reading on a screen	I prefer the original hard copy		Yes	Infrequently	Never or not available	Infrequently	Never or not available	Infrequently	Never or not available	Infrequently	Sometimes (once a month)
4904662476											IUCN WCPA member			Australia	Male	Sometimes (once a month)		Easy	Use university access as honorary staff member	Essential	Hard to evaluate nominations without access to latest scientific literature	Journal of Biogeography	I prefer reading on a screen	I prefer the original hard copy		Yes	Sometimes (once a month)	FrequentlyÂ (once a week)	Very frequently (daily)	Never or not available	FrequentlyÂ (once a week)	FrequentlyÂ (once a week)	Sometimes (once a month)	Very frequently (daily)
4904650310		IUCN Government Agency Member							IUCN SSC member					New Zealand	Male	FrequentlyÂ (once a week)		Not easy	It's easy to access abstracts online, and to obtain PDFs with 1-3 days' delay via our library service, requiring a formal online request. So I can reasonably easily, but with a significant delay, get important documents, but I can't browse journals beyond abstracts. We no longer have a hard-copy library.	Essential			I prefer printingÂ out to read	I prefer the original hard copy	Depends mainly on size of the document and typeface - small simple documents are fine to read on screen.	Yes	Never or not available	Infrequently	Sometimes (once a month)	Never or not available	Sometimes (once a month)	Sometimes (once a month)	Sometimes (once a month)	Sometimes (once a month)
4904600506				IUCN National NGO Member		IUCN CEC member								Liberia	Male	FrequentlyÂ (once a week)		Not easy	The means of getting the scientific literature was a bit difficult	Very important	Literature will provide more scientific information and materials		I prefer printingÂ out to read	I prefer the original hard copy		Yes	FrequentlyÂ (once a week)	Sometimes (once a month)	FrequentlyÂ (once a week)	Infrequently	Sometimes (once a month)	Sometimes (once a month)	Sometimes (once a month)	FrequentlyÂ (once a week)						scientific literature should be available at all times and more should be produced
4904580341						IUCN CEC member								Australia	Male	FrequentlyÂ (once a week)
4904563617													member via Australian Grains Genebank	Australia	Male	Very frequently (daily)		Easy		Very important		TAG, GRACE,	I prefer printingÂ out to read			No	Sometimes (once a month)	Never or not available	Infrequently	Never or not available	Sometimes (once a month)	Never or not available	Never or not available	FrequentlyÂ (once a week)	Sometimes (once a month)	Moderate positive effect		Slight negative impact
4904542547				IUCN National NGO Member										United States of America	Female	FrequentlyÂ (once a week)		Very easy	Institutional access through university library, including inter library loans	Essential		Really hard to pick just one	I prefer reading on a screen	I prefer the original hard copy		Yes	Infrequently	Infrequently	FrequentlyÂ (once a week)	Never or not available	Infrequently	Infrequently	Never or not available	Infrequently
4904534075						IUCN CEC member					IUCN WCPA member			Paraguay	Female	Sometimes (once a month)		Not at all easy		Somewhat important			I prefer reading on a screen	I prefer the original hard copy		Yes	Sometimes (once a month)	Never or not available	Sometimes (once a month)	Never or not available	Infrequently	Never or not available	Infrequently	FrequentlyÂ (once a week)
4904527443									IUCN SSC member					Australia	Female	FrequentlyÂ (once a week)		Easy	easy at the moment because I have university affiliation, but that will soon come to an end and any access will be very difficult	Very important	science must inform the base of all of our decisions and actions but knowing what is already done also avoids duplication	conservation biology	I prefer reading on a screen	I prefer the original hard copy		Yes	Sometimes (once a month)	Infrequently	Very frequently (daily)	Infrequently	FrequentlyÂ (once a week)	Never or not available	Sometimes (once a month)	FrequentlyÂ (once a week)
4904509016											IUCN WCPA member			Venezuela (Bolivarian Republic of)	Female	Sometimes (once a month)		Not at all easy		Somewhat important		Environmental Management	I prefer reading on a screen	I prefer reading on a screen		No	Never or not available	Never or not available	Never or not available	Infrequently	FrequentlyÂ (once a week)	Infrequently	FrequentlyÂ (once a week)	FrequentlyÂ (once a week)	Sometimes (once a month)	Slight positive effect		Slight negative impact
4904508660											IUCN WCPA member			Australia	Male	Sometimes (once a month)		Not easy	I work in two unpopular fields, karst and geoconservation. There is lots of grey literature and literature in languages that are difficult to get translated	Very important			I prefer printingÂ out to read		Unpublished reports	Yes	Sometimes (once a month)	Infrequently	FrequentlyÂ (once a week)	Never or not available	Infrequently	Infrequently	Infrequently	FrequentlyÂ (once a week)
4904506925	IUCN State Member													Botswana	Male	FrequentlyÂ (once a week)		Not easy	Need access to journals which requires financial subscriptions	Very important		journal of ecology	I prefer reading on a screen		A pdf format best for my reading	No	Infrequently	Infrequently	FrequentlyÂ (once a week)	Never or not available	Never or not available	Never or not available	FrequentlyÂ (once a week)	Very frequently (daily)	Very frequently (daily)	Great positive effect	Access to current knowledge base will be useful in effective evaluation of current conservation programs	Great negative impact		none
4904503163											IUCN WCPA member			New Zealand	Male	FrequentlyÂ (once a week)		Easy		Very important			I prefer the original hard copy	I prefer the original hard copy		No	Infrequently	Very frequently (daily)	Infrequently	Never or not available	Never or not available	Sometimes (once a month)	Sometimes (once a month)	Very frequently (daily)	Infrequently	Slight positive effect		Slight negative impact	Keeping up to date, especially with both the speed and the magnitude of changes that result from Global Warming.
4904498761									IUCN SSC member					Australia	Male	Infrequently		Easy		Somewhat important			I prefer printingÂ out to read	I prefer printingÂ out to read		No	Sometimes (once a month)	Never or not available	Never or not available	Never or not available	Never or not available	FrequentlyÂ (once a week)	Never or not available	FrequentlyÂ (once a week)	Infrequently	Slight positive effect		Slight negative impact
4904477878									IUCN SSC member					New Zealand	Male	FrequentlyÂ (once a week)		Easy		Very important	My institute provides this.		I prefer printingÂ out to read	I prefer the original hard copy		Yes	Very frequently (daily)	Never or not available	Very frequently (daily)	Never or not available	Infrequently	Infrequently	Infrequently	Sometimes (once a month)
4904477831	IUCN State Member	IUCN Government Agency Member							IUCN SSC member					New Zealand	Male	Sometimes (once a month)		Easy		Very important			I prefer reading on a screen	I prefer the original hard copy		Yes	Infrequently	Never or not available	Sometimes (once a month)	Never or not available	Infrequently	Infrequently	Sometimes (once a month)	Sometimes (once a month)
4904477316			IUCN International NGO Member	IUCN National NGO Member										United States of America	Female	Sometimes (once a month)		Easy		Somewhat important		zoo biology	I prefer reading on a screen	I prefer the original hard copy		Yes	Sometimes (once a month)	Infrequently	Sometimes (once a month)	Never or not available	Never or not available	Infrequently	Never or not available	Sometimes (once a month)
4904474327												IUCN Secretariat staff		Fiji	Female	Sometimes (once a month)		Very easy		Very important		Marine conservation	I prefer printingÂ out to read			Yes	Very frequently (daily)	Never or not available	Very frequently (daily)	Infrequently	Infrequently	Sometimes (once a month)	Infrequently	Very frequently (daily)						No
4904467818						IUCN CEC member			IUCN SSC member		IUCN WCPA member			United Arab Emirates	Male	Infrequently		Easy		Very important			I prefer printingÂ out to read	I prefer the original hard copy		Yes	Infrequently	Never or not available	Infrequently	Never or not available	Sometimes (once a month)	Sometimes (once a month)	Never or not available	Sometimes (once a month)
4904467355									IUCN SSC member					Palau	Male	Infrequently		Not easy		Somewhat important		no one in particular	I prefer reading on a screen	I prefer reading on a screen		No	Never or not available	Never or not available	Infrequently	Never or not available	Infrequently	Infrequently	Infrequently	Infrequently	Sometimes (once a month)	Moderate positive effect		Moderate negative impact
4904467311						IUCN CEC member								New Zealand	Female	Infrequently		Not easy		Not at all important			I prefer the original hard copy	I prefer the original hard copy		Yes	Infrequently	Infrequently	Never or not available	Never or not available	Never or not available	Never or not available	Never or not available	Never or not available						I generally do not access scientific literature - not my area of expertise. My focus is on critical perspectives on education for sustainability.
4904462829													IUCN Bat Specialist Group	United States of America	Female	Very frequently (daily)		Not easy	Some of the literature is grey literature in the countries that I work in (Indonesia, Philippines mostly, other ASEAN countries)--they are not readily available and require contacting the authors or the proper government agencies, all of which are slow to respond.	Essential	Up-to-date scientific literature is absolutely necessary for proper conservation planning.	Oryx	I prefer reading on a screen	I prefer the original hard copy		Yes	Very frequently (daily)	Never or not available	Very frequently (daily)	Never or not available	FrequentlyÂ (once a week)	Never or not available	FrequentlyÂ (once a week)	FrequentlyÂ (once a week)
4904439173									IUCN SSC member					Mexico	Male	FrequentlyÂ (once a week)		Very easy	My university has access to journals	Essential		Conservation Biology (but I have access to it)	I prefer reading on a screen	I prefer reading on a screen		Yes	Never or not available	Never or not available	Very frequently (daily)	Never or not available	Infrequently	Never or not available	Infrequently	Sometimes (once a month)
4904433470												IUCN Secretariat staff		Fiji	Male	Very frequently (daily)		Not easy		Very important			I prefer printingÂ out to read	I prefer reading on a screen		Yes	Sometimes (once a month)	Infrequently	FrequentlyÂ (once a week)	Infrequently	Sometimes (once a month)	FrequentlyÂ (once a week)	FrequentlyÂ (once a week)	FrequentlyÂ (once a week)
4904425252									IUCN SSC member					United States of America	Male	Infrequently		Easy		Somewhat important			I prefer reading on a screen	I prefer the original hard copy		Yes	Sometimes (once a month)	Never or not available	Sometimes (once a month)	Never or not available	Infrequently	Infrequently	Infrequently	Infrequently
4904424623									IUCN SSC member					New Zealand	Male	Sometimes (once a month)		Not at all easy	I am self-employed so no longer have access to an institutional library, including periodicals. My access to this literature is mainly confined to what is freely accessible on the internet.	Somewhat important	My knowledge in my field of interest (subterranean species, which has a very widespread literature) is no longer keeping pace with new developments, taxonomies, etc.	Difficult to say, the literature is so widespread	I prefer the original hard copy			No	Never or not available	Infrequently	Never or not available	Never or not available	Infrequently	Never or not available	Sometimes (once a month)	FrequentlyÂ (once a week)	Sometimes (once a month)	Moderate positive effect	As a regional rep my role is mainly keeping an eye on local (NZ) issues. NZ subterranean fauna knowledge is often limited due to lack of taxonomy but occasional work is completed by overseas researchers. Also useful for me to keep up with new ecological understandings in this field.	Moderate negative impact
4904424179									IUCN SSC member					United States of America	Male	FrequentlyÂ (once a week)		Very easy		Essential		Oryx	I prefer printingÂ out to read	I prefer the original hard copy		Yes	FrequentlyÂ (once a week)	Never or not available	Very frequently (daily)	Never or not available	Infrequently	Sometimes (once a month)	Infrequently	Infrequently
4904412762								IUCN CEM member						Ireland	Male	FrequentlyÂ (once a week)		Easy		Very important		NPG Group Journal	I prefer reading on a screen	I prefer reading on a screen		Yes	Sometimes (once a month)	Sometimes (once a month)	Very frequently (daily)	Infrequently	Sometimes (once a month)	Sometimes (once a month)	Sometimes (once a month)	FrequentlyÂ (once a week)
4904410495										IUCN WCEL member				Chile	Male	Sometimes (once a month)		Not easy		Very important			I prefer printingÂ out to read	I prefer the original hard copy		No	Very frequently (daily)	Infrequently	Never or not available	Never or not available	Sometimes (once a month)	Sometimes (once a month)	Sometimes (once a month)	FrequentlyÂ (once a week)	Frequently (once a week)	Great positive effect		Moderate negative impact		Thanks for the interest.
4904404467									IUCN SSC member					New Caledonia, France	Male	FrequentlyÂ (once a week)		Not easy	Working for a private firm, access to scientific literature with a no institutional access is not always easy	Essential		Journal of Environmental management ; Environmental Sciences & Technologies	I prefer reading on a screen	I prefer the original hard copy		No	Very frequently (daily)	Infrequently	Never or not available	FrequentlyÂ (once a week)	FrequentlyÂ (once a week)	Never or not available	Infrequently	Very frequently (daily)		Moderate positive effect		Moderate negative impact
4904395775				IUCN National NGO Member					IUCN SSC member		IUCN WCPA member			United States of America	Male	FrequentlyÂ (once a week)		Not easy		Very important			I prefer printingÂ out to read			Yes	Infrequently	Never or not available	Infrequently	Never or not available	Sometimes (once a month)	Sometimes (once a month)	Sometimes (once a month)	Sometimes (once a month)						I will retire from The Nature Conservancy in about 11 months. After that I will not access to the TNC membership journals and that will complicate access to literature for me at a time when I expect my voluntary contributions to IUCN commissions to increase..
4904394436				IUCN National NGO Member					IUCN SSC member					Sri Lanka	Female	Sometimes (once a month)		Not easy		Very important		Springer	I prefer reading on a screen	I prefer reading on a screen		No	Never or not available	Infrequently	Never or not available	Infrequently	Sometimes (once a month)	Never or not available	FrequentlyÂ (once a week)	FrequentlyÂ (once a week)	Sometimes (once a month)	Great positive effect		Moderate negative impact
4904386425									IUCN SSC member					United States of America	Male	Sometimes (once a month)
4904375195														United States of America	Female	FrequentlyÂ (once a week)		Very easy		Essential			I prefer reading on a screen	I prefer the original hard copy		Yes	Very frequently (daily)	Never or not available	Very frequently (daily)	Never or not available	Infrequently	Infrequently	Never or not available	Infrequently
4904348580							IUCN CEESP member							Saudi Arabia	Male	FrequentlyÂ (once a week)		Easy		Very important	It helps in increasing our current knowledge about the species, flora and fauna and also telling us the efforts taken by IUCN in different parts of the world for the conservation of nature and natural resources.		I prefer reading on a screen	I prefer the original hard copy		Yes	Infrequently	Sometimes (once a month)	FrequentlyÂ (once a week)	Infrequently	Never or not available	Never or not available	Never or not available	Very frequently (daily)						IUCN / its commissions may start to give a subject topic monthly to send the ideas, articles so that all should take interest to share something, I hope it is already doing that.
4904346691											IUCN WCPA member			Cameroon	Female	FrequentlyÂ (once a week)		Not easy		Essential		Summon	I prefer printingÂ out to read	I prefer the original hard copy		No	Never or not available	Never or not available	Never or not available	Never or not available	Never or not available	Never or not available	Infrequently	FrequentlyÂ (once a week)	Frequently (once a week)	Great positive effect		Moderate negative impact
4904340069									IUCN SSC member					Italy	Male	Sometimes (once a month)
4904333609									IUCN SSC member					Lao People's Democratic Republic	Female	FrequentlyÂ (once a week)		Very easy	I access literature through my university. Once i graduate, i don't know where i will access literature.	Essential		Not sure	I prefer the original hard copy	I prefer the original hard copy	Or an e-reader	Yes	FrequentlyÂ (once a week)	Infrequently	FrequentlyÂ (once a week)	Never or not available	Sometimes (once a month)	Never or not available	Never or not available	Sometimes (once a month)
4904324270									IUCN SSC member					Canada	Male	Sometimes (once a month)		Easy	I get literarture through the web especially from sites like sci-hub.io	Very important		hard to decide	I prefer printingÂ out to read	I prefer the original hard copy		Yes	Sometimes (once a month)	Infrequently	Sometimes (once a month)	Never or not available	Infrequently	Infrequently	Sometimes (once a month)	Sometimes (once a month)						No
4904321998				IUCN National NGO Member					IUCN SSC member					Cameroon	Female	FrequentlyÂ (once a week)		Not easy		Very important			I prefer reading on a screen			No	Never or not available	Never or not available	Sometimes (once a month)	Never or not available	Sometimes (once a month)	Never or not available	Sometimes (once a month)	FrequentlyÂ (once a week)	Frequently (once a week)	Great positive effect		Great negative impact
4904313486		IUCN Government Agency Member												New Zealand	Male	Very frequently (daily)		Very easy		Essential		there is no single one as invasive spceis span such a breadth of disciplines	I prefer printingÂ out to read	I prefer the original hard copy		Yes	Very frequently (daily)	Never or not available	Very frequently (daily)	Infrequently	Infrequently	Sometimes (once a month)	Never or not available	Very frequently (daily)
4904301272									IUCN SSC member					United States of America	Male	FrequentlyÂ (once a week)		Not easy		Essential			I prefer reading on a screen	I prefer reading on a screen		No	Never or not available	Never or not available	Never or not available	Never or not available	Infrequently	Sometimes (once a month)	FrequentlyÂ (once a week)	FrequentlyÂ (once a week)	Frequently (once a week)	Great positive effect	Gaining access would markedly improve my ability to stay current and provide data-driven analysis.	Slight negative impact	Through networking I gain access to much of what I need, but much is no doubt missed.
4904298822												IUCN Secretariat staff		Switzerland	Male	Sometimes (once a month)		Easy		Very important			I prefer printingÂ out to read	I prefer reading on a screen		No	Sometimes (once a month)	Never or not available	Never or not available	Never or not available	Infrequently	Never or not available	FrequentlyÂ (once a week)	Infrequently	Frequently (once a week)	Moderate positive effect		Slight negative impact
4904284146										IUCN WCEL member				Uruguay	Male	Never
4904276688							IUCN CEESP member							United Kingdom of Great Britain and Northern Ireland	Female	Very frequently (daily)		Very easy	I am an academic and therefore have full access to scientific literature	Essential		N/A	I prefer reading on a screen	I prefer reading on a screen		Yes	Sometimes (once a month)	Infrequently	Very frequently (daily)	Never or not available	Infrequently	Sometimes (once a month)	Infrequently	Very frequently (daily)
4904269139									IUCN SSC member					United States of America	Male	FrequentlyÂ (once a week)		Not easy		Essential		Conservation Biology	I prefer printingÂ out to read			No	Never or not available	Infrequently	Never or not available	Never or not available	FrequentlyÂ (once a week)	FrequentlyÂ (once a week)	Infrequently	FrequentlyÂ (once a week)	Frequently (once a week)	Great positive effect		Moderate negative impact
4904265259												IUCN Secretariat staff		Costa Rica	Male	Very frequently (daily)
4904260467									IUCN SSC member					United States of America	Male	FrequentlyÂ (once a week)		Very easy	Affiliated with college	Essential		many	I prefer reading on a screen	I prefer the original hard copy		Yes	FrequentlyÂ (once a week)	Never or not available	FrequentlyÂ (once a week)	Never or not available	Infrequently	Infrequently	Never or not available	Infrequently
4904244711													IUCN Specialist Group	Australia	Male	FrequentlyÂ (once a week)		Easy	I have access to most of the literature I need through my university.	Essential	Access to the latest taxonomic literature is essential.	Nova Hedwigia	I prefer reading on a screen	I prefer the original hard copy		Yes	Sometimes (once a month)	Never or not available	FrequentlyÂ (once a week)	Never or not available	Infrequently	Never or not available	Infrequently	FrequentlyÂ (once a week)
4904244522							IUCN CEESP member				IUCN WCPA member			Iran (Islamic Republic of)	Male	Very frequently (daily)		Not easy		Essential		Almost all (itâ€™s different based on kind of paper)	I prefer reading on a screen	I prefer the original hard copy		No	Never or not available	Never or not available	Infrequently	Never or not available	Never or not available	Infrequently	Very frequently (daily)	Very frequently (daily)	Very frequently (daily)	Moderate positive effect		Moderate negative impact		Thanks for your efforts to make easy the accessibility to papers and books
4904229845	IUCN State Member													United States of America	Female	Sometimes (once a month)		Not at all easy		Somewhat important			I prefer reading on a screen			No	Never or not available	Never or not available	Never or not available	Never or not available	Never or not available	Infrequently	Infrequently	Sometimes (once a month)	Sometimes (once a month)	Slight positive effect		Slight negative impact
4904212227			IUCN International NGO Member											United States of America	Female	Sometimes (once a month)		Not easy	I don't have access to a scientific database or online journal subscription. I largely have to contact the primary author directly for a study.	Very important		There isn't just one.	I prefer reading on a screen		Accessing pdfs that I can read on line or print is best.	No	Never or not available	Never or not available	Never or not available	Never or not available	Sometimes (once a month)	Sometimes (once a month)	Sometimes (once a month)	Sometimes (once a month)	Sometimes (once a month)	Great positive effect		Moderate negative impact	Its a pain more than anything. Not impossible to overcome, but makes things difficult and takes up time chasing things down.
4904180446						IUCN CEC member					IUCN WCPA member			Bulgaria	Female	Never
4904168591											IUCN WCPA member			Canada	Male	Infrequently
4904160289									IUCN SSC member					United States of America	Male	Infrequently		Very easy		Essential		Taxon	I prefer reading on a screen	I prefer reading on a screen		Yes	Sometimes (once a month)	Never or not available	FrequentlyÂ (once a week)	Sometimes (once a month)	Sometimes (once a month)	Infrequently	Infrequently	Sometimes (once a month)
4904112560									IUCN SSC member					France	Female	Sometimes (once a month)		Not easy	Most sites ask for an institutional e-mail address and I only have a personal one (gmail)	Very important			I prefer printingÂ out to read	I prefer the original hard copy		No	Never or not available	Never or not available	Never or not available	Never or not available	Sometimes (once a month)	Never or not available	FrequentlyÂ (once a week)	FrequentlyÂ (once a week)	Frequently (once a week)	Moderate positive effect		Moderate negative impact
4904098941				IUCN National NGO Member										United States of America	Male	FrequentlyÂ (once a week)		Easy	As a unit of the University of Hawaii, my unit has access to scientific libraries and extensive on-line literature resources, at no additional cost to our unit..	Very important	As a research organization, we need to be able to access scientific publications and reference materials.	We have ready access to many journals. For my work as administrator, no one journal is most important.	I prefer printingÂ out to read	I prefer the original hard copy		Yes	Sometimes (once a month)	Never or not available	FrequentlyÂ (once a week)	Never or not available	Infrequently	Never or not available	Infrequently	Infrequently
4904094948									IUCN SSC member						Female	Infrequently		Easy		Essential			I prefer reading on a screen	I prefer the original hard copy		Yes	Sometimes (once a month)	Never or not available	Sometimes (once a month)	Never or not available	FrequentlyÂ (once a week)	Never or not available	Never or not available	FrequentlyÂ (once a week)
4904092947								IUCN CEM member						Costa Rica	Female	Sometimes (once a month)		Easy	I have access through my working place... Organization for Tropical Studies.	Somewhat important		SER	I prefer reading on a screen			Yes	Sometimes (once a month)	Never or not available	Sometimes (once a month)	Never or not available	Infrequently	Never or not available	Never or not available	Sometimes (once a month)
4904083192									IUCN SSC member					United States of America	Female	Sometimes (once a month)		Very easy		Essential			I prefer printingÂ out to read	I prefer printingÂ out to read		Yes	Infrequently	Infrequently	FrequentlyÂ (once a week)	Never or not available	Sometimes (once a month)	Infrequently	Never or not available	FrequentlyÂ (once a week)
4904081138									IUCN SSC member					United States of America	Male	Sometimes (once a month)		Not easy	cost associated w/some journals is a problem	Very important			I prefer reading on a screen	I prefer printingÂ out to read		No	Never or not available	Infrequently	Never or not available	Never or not available	FrequentlyÂ (once a week)	FrequentlyÂ (once a week)	FrequentlyÂ (once a week)	FrequentlyÂ (once a week)	Sometimes (once a month)	Moderate positive effect		Moderate negative impact		did not know i could use iucn librarian. is this possible for SSC member thru email?
4904074518			IUCN International NGO Member											Mexico	Male	Sometimes (once a month)		Easy		Very important			I prefer printingÂ out to read	I prefer the original hard copy		Yes	FrequentlyÂ (once a week)	Infrequently	FrequentlyÂ (once a week)	Sometimes (once a month)	Sometimes (once a month)	Infrequently	Never or not available	FrequentlyÂ (once a week)						Any
4904070911								IUCN CEM member			IUCN WCPA member			Canada	Male	Sometimes (once a month)		Easy	It depends. Sometimes the paper is freely available - other times I have to pay $25-$35 per article. I am a member of the Society for Conservation Biology and I subscribe to their peer reviewed publications - so if the article is in one of their publications I have free access to them. Sometimes a colleague will send me a pdf of the article.	Somewhat important	Again, it depends on the situation. I've amassed a substantial library of articles and I have connections with colleagues where I can access articles. When all that fails I will pay for an article.	Nature or Science	I prefer reading on a screen	I prefer the original hard copy	For books I prefer to read on my ebook.	Yes	Infrequently	Infrequently	Infrequently	Never or not available	Infrequently	FrequentlyÂ (once a week)	FrequentlyÂ (once a week)	FrequentlyÂ (once a week)
4904048621	IUCN State Member													Italy	Male	FrequentlyÂ (once a week)		Not easy		Essential			I prefer reading on a screen	I prefer reading on a screen		No	Never or not available	Never or not available	Never or not available	Never or not available	FrequentlyÂ (once a week)	Never or not available	Sometimes (once a month)	FrequentlyÂ (once a week)	Frequently (once a week)	Great positive effect		Moderate negative impact
4904047021						IUCN CEC member								United Kingdom of Great Britain and Northern Ireland	Female	FrequentlyÂ (once a week)		Not easy	I have internet access and access to JStor but no academic affiliation.	Somewhat important		Environmental Education	I prefer reading on a screen	I prefer the original hard copy		No	Never or not available	Never or not available	Infrequently	Never or not available	Infrequently	Infrequently	Infrequently	Very frequently (daily)	Frequently (once a week)	Great positive effect		Moderate negative impact
4904029921											IUCN WCPA member			Portugal	Female	Infrequently
4904029622								IUCN CEM member						Canada	Male	Sometimes (once a month)		Easy		Very important		There is no single journal.	I prefer printingÂ out to read	I prefer the original hard copy		No	FrequentlyÂ (once a week)	Never or not available	Infrequently	Never or not available	FrequentlyÂ (once a week)	Sometimes (once a month)	Infrequently	Infrequently	Sometimes (once a month)	Moderate positive effect		No impact at all		No.
4904025930									IUCN SSC member					Bermuda, United Kingdom of Great Britain and Northern Ireland	Male	Sometimes (once a month)		Easy	Bermuda has an excellent librarian for the natural sciences funded and qualified to access internet sources	Very important			I prefer reading on a screen	I prefer the original hard copy		Yes	Sometimes (once a month)	Never or not available	Never or not available	Never or not available	Never or not available	Infrequently	Infrequently	Sometimes (once a month)
4904014030									IUCN SSC member					Brazil	Male	Sometimes (once a month)		Easy		Essential			I prefer printingÂ out to read	I prefer the original hard copy		Yes	Sometimes (once a month)	Never or not available	Sometimes (once a month)	Never or not available	Infrequently	Never or not available	Never or not available	Infrequently						I have very good access to scientific literature via my University
4904008122									IUCN SSC member					Russian Federation	Male	Infrequently		Very easy	I am living and working in a large city with ver rich libraries. Besides, my University provides me with online access to most needed scientific journal. The public digital libraries such as BHL are also of greatest help	Essential		Zootaxa	I prefer reading on a screen	I prefer the original hard copy		Yes	FrequentlyÂ (once a week)	FrequentlyÂ (once a week)	FrequentlyÂ (once a week)	Never or not available	Sometimes (once a month)	Never or not available	Never or not available	FrequentlyÂ (once a week)
4904005617										IUCN WCEL member				Argentina	Male	FrequentlyÂ (once a week)
4903997534												IUCN Secretariat staff		Fiji	Male	FrequentlyÂ (once a week)		Easy	I have access to a relatively large number of scientific databases through a university, but my colleagues do not.	Essential		Deep-sea Research II	I prefer reading on a screen			Yes	Infrequently	Never or not available	FrequentlyÂ (once a week)	Never or not available	Infrequently	Never or not available	Never or not available	FrequentlyÂ (once a week)						Glad to see this survey. I think access to scientific literature definitely could be improved.
4903995426									IUCN SSC member					United Kingdom of Great Britain and Northern Ireland	Male	FrequentlyÂ (once a week)		Not easy	Independent Researcher, without ready electronic access to institution libraries	Very important		Waterbirds	I prefer reading on a screen	I prefer reading on a screen		No	Never or not available	Infrequently	Never or not available	Never or not available	Sometimes (once a month)	Sometimes (once a month)	Sometimes (once a month)	FrequentlyÂ (once a week)	Frequently (once a week)	Great positive effect		Slight negative impact		Access to IUCN library would be a great facility that I would certainly use.
4903987546									IUCN SSC member					Madagascar	Male	FrequentlyÂ (once a week)		Easy		Somewhat important		biodiversity and conservation	I prefer the original hard copy			Yes	Never or not available	Never or not available	Never or not available	Never or not available	Never or not available	Never or not available	FrequentlyÂ (once a week)	Infrequently						non
4903972966									IUCN SSC member					Portugal	Female	FrequentlyÂ (once a week)		Easy		Essential		Phytotaxa, Systematics and Biodiversity, Conservation Biology, Plos One, Molecular Phylogenetics and Evolution, national and regional Floras, etcâ€¦	I prefer printingÂ out to read	I prefer printingÂ out to read		Yes	Sometimes (once a month)	Infrequently	FrequentlyÂ (once a week)	Infrequently	Infrequently	Never or not available	Infrequently	FrequentlyÂ (once a week)
4903966154									IUCN SSC member					Brazil	Male	FrequentlyÂ (once a week)		Easy		Essential		Conservation Biology and journals like that	I prefer reading on a screen	I prefer the original hard copy		Yes	Infrequently	Infrequently	FrequentlyÂ (once a week)	Sometimes (once a month)	FrequentlyÂ (once a week)	Never or not available	Infrequently	FrequentlyÂ (once a week)
4903948102				IUCN National NGO Member										Bosnia and Herzegovina	Female	Infrequently
4903946152											IUCN WCPA member			Costa Rica	Male	FrequentlyÂ (once a week)		Easy		Very important		Nature	I prefer reading on a screen	I prefer reading on a screen		No	Sometimes (once a month)	FrequentlyÂ (once a week)	FrequentlyÂ (once a week)	FrequentlyÂ (once a week)	FrequentlyÂ (once a week)	Sometimes (once a month)	FrequentlyÂ (once a week)	FrequentlyÂ (once a week)	Frequently (once a week)	Great positive effect		Moderate negative impact		no
4903921658										IUCN WCEL member				India	Male	Sometimes (once a month)		Easy		Essential			I prefer reading on a screen	I prefer printingÂ out to read		No	Infrequently	Infrequently	Sometimes (once a month)	Never or not available	Never or not available	Never or not available	Never or not available	Sometimes (once a month)	Sometimes (once a month)	Great positive effect		Moderate negative impact
4903918791			IUCN International NGO Member						IUCN SSC member					United States of America	Female	FrequentlyÂ (once a week)		Not easy		Very important			I prefer reading on a screen	I prefer reading on a screen		No	Sometimes (once a month)	Infrequently	Never or not available	Never or not available	Infrequently	Never or not available	Sometimes (once a month)	Sometimes (once a month)	Frequently (once a week)	Moderate positive effect		Slight negative impact
4903909596									IUCN SSC member					United States of America	Female	Sometimes (once a month)		Not easy	I use a work-related journal access code, but only a select number of journals provide access	Somewhat important	I don't really do IUCN-related work; however, it is very important for my current job	not sure	I prefer reading on a screen	I prefer reading on a screen	occasional print outs are good for reading away from work	Yes	Never or not available	Never or not available	FrequentlyÂ (once a week)	Never or not available	Infrequently	Never or not available	Sometimes (once a month)	FrequentlyÂ (once a week)
4903906968													IUCN specialist group member	Argentina	Male	Sometimes (once a month)		Easy		Very important			I prefer reading on a screen			Yes	Infrequently	Infrequently	Very frequently (daily)	Never or not available	Sometimes (once a month)	Never or not available	Very frequently (daily)	Infrequently
4903882148									IUCN SSC member		IUCN WCPA member			Venezuela (Bolivarian Republic of)	Male	FrequentlyÂ (once a week)		Not easy		Very important		Conservation Biology	I prefer reading on a screen	I prefer reading on a screen		No	Infrequently	Infrequently	Never or not available	Infrequently	Sometimes (once a month)	Never or not available	FrequentlyÂ (once a week)	Very frequently (daily)	Frequently (once a week)	Great positive effect		Great negative impact		Since over a year, Venezuelans have no legal possibility to purchase any good or service through the Internet, including books, CDs, of any kind, and also subscriptions to international scientific journals or any other information, either printed or online. Our universities and research centers (both public and private) are under the same restriction, so the only way we have to access any literat…
4903876901									IUCN SSC member					India	Male	Sometimes (once a month)		Easy		Very important		RED LISTS update	I prefer reading on a screen	I prefer the original hard copy		No	Never or not available	Never or not available	Never or not available	Never or not available	Never or not available	Sometimes (once a month)	Never or not available	FrequentlyÂ (once a week)	Frequently (once a week)	Moderate positive effect		Moderate negative impact		IUCN should upload disaggregated data on its website
4903862858									IUCN SSC member					Germany	Male	FrequentlyÂ (once a week)		Not easy		Essential		Zootaxa	I prefer reading on a screen	I prefer reading on a screen		No	Never or not available	Infrequently	Never or not available	Never or not available	Sometimes (once a month)	FrequentlyÂ (once a week)	FrequentlyÂ (once a week)	FrequentlyÂ (once a week)	Sometimes (once a month)	Great positive effect		Great negative impact
4903862625									IUCN SSC member					United States of America	Male	Infrequently		Not easy	I am not currently affiliated with an organization, thus there is no institutional literature support.	Somewhat important	I continue to work independently on conservation projects. It would be useful to have access to information not readily available in public forums.	Zoo Biology	I prefer printingÂ out to read	I prefer printingÂ out to read		No	Never or not available	Infrequently	Never or not available	Never or not available	Infrequently	Never or not available	Sometimes (once a month)	Sometimes (once a month)	Sometimes (once a month)	Moderate positive effect		Great negative impact	Provides me with less access to information on my topic.
4903855228	IUCN State Member													Botswana	Male	Sometimes (once a month)		Easy		Essential		Journal of Hydrogeology	I prefer printingÂ out to read	I prefer the original hard copy		Yes	FrequentlyÂ (once a week)	FrequentlyÂ (once a week)	FrequentlyÂ (once a week)	Never or not available	Infrequently	Infrequently	Sometimes (once a month)	FrequentlyÂ (once a week)
4903854610									IUCN SSC member					Sudan	Female	Very frequently (daily)		Not easy	Because of the American sanction on Sudan we could not have credit card to pay on line for purchasing articles that is not free. We only have access for free articles (I daily consult scientific literature for academic work).	Essential		Wiley Online Library, but not free access	I prefer reading on a screen			No	Never or not available	Never or not available	Never or not available	Never or not available	Infrequently	FrequentlyÂ (once a week)	Never or not available	Very frequently (daily)	Never	No effect at allÂ	My institution have not access for many journals because of the sanction.	Great negative impact		Easy access to scientific literature is important to my contribution to IUCN and for my academic work.
4903853225													Member Galliformes Specialist Group	United States of America	Male	Very frequently (daily)		Not easy	Without university access research searches and article securing requires great effort.	Essential	Papers for publication as well as proposals require summaries of current literature.	Conservation Biology	I prefer reading on a screen	I prefer printingÂ out to read		No	Very frequently (daily)	Sometimes (once a month)	Never or not available	Never or not available	Very frequently (daily)	Sometimes (once a month)	FrequentlyÂ (once a week)	FrequentlyÂ (once a week)	Frequently (once a week)	Moderate positive effect		Moderate negative impact
4903825372									IUCN SSC member					United States of America	Male	FrequentlyÂ (once a week)		Not at all easy		Essential		Journal of Herpetology and/or Herpetologica	I prefer reading on a screen	I prefer the original hard copy		No	Never or not available	Infrequently	Never or not available	Never or not available	Very frequently (daily)	Never or not available	Very frequently (daily)	Very frequently (daily)	Frequently (once a week)	Great positive effect		Moderate negative impact
4903813809									IUCN SSC member					Croatia	Male	Sometimes (once a month)		Easy		Very important		European Journal of Wildlife Research	I prefer reading on a screen	I prefer the original hard copy		Yes	Infrequently	Never or not available	Infrequently	Never or not available	Very frequently (daily)	Sometimes (once a month)	Very frequently (daily)	Very frequently (daily)
4903812454									IUCN SSC member					Mexico	Male	Very frequently (daily)		Not easy		Essential		Cornell Birds of North America, The Journal of Wildlife Management	I prefer printingÂ out to read	I prefer the original hard copy		No	Very frequently (daily)	Never or not available	Never or not available	Never or not available	Sometimes (once a month)	Never or not available	Sometimes (once a month)	Very frequently (daily)	Very frequently (daily)	Great positive effect		Great negative impact
4903790204									IUCN SSC member					United States of America	Female	FrequentlyÂ (once a week)		Easy		Essential			I prefer printingÂ out to read	I prefer the original hard copy		Yes	FrequentlyÂ (once a week)	Infrequently	FrequentlyÂ (once a week)	Sometimes (once a month)	Never or not available	Infrequently	Never or not available	Sometimes (once a month)
4903760419			IUCN International NGO Member											Switzerland	Female	Sometimes (once a month)		Easy		Very important		revue juridique de l'environnement	I prefer printingÂ out to read			No	Sometimes (once a month)	Never or not available	Never or not available	Infrequently	Sometimes (once a month)	Sometimes (once a month)	FrequentlyÂ (once a week)	Sometimes (once a month)	Sometimes (once a month)	Moderate positive effect		Moderate negative impact
4903759315									IUCN SSC member					Canada	Male	Sometimes (once a month)		Not easy	Since completing my PhD access to the University library system has been cutoff, I can purchase access but it is only partial, not good enougn	Essential	I have a PHD and a research scientist and publish scientific literature and write reports that both requires access to scientific literature.	there is not one I Need access to all of them related to biology andconservation	I prefer reading on a screen	I prefer the original hard copy	I need digital access, I read on screen to save paper, but print occasionally	No	Never or not available	Never or not available	Never or not available	Never or not available	Infrequently	Never or not available	Sometimes (once a month)	Very frequently (daily)	Frequently (once a week)	Great positive effect	I need regular access to the biological scientific literature	Moderate negative impact	It is only a moderate effect because I can get what I need at great extra effort and imposition on some friends that have access. Google scholar has about 25-30% of what I need, but that is not good enough.	If the IUCN could somehow provide access to the biological scientific literature, THAT WOULD BE FANTASITC, and solve an ongoing problem
4903752796								IUCN CEM member						United States of America	Female	Infrequently		Easy		Somewhat important			I prefer printingÂ out to read			Yes	Infrequently	Never or not available	FrequentlyÂ (once a week)	Never or not available	Infrequently	Never or not available	Infrequently	FrequentlyÂ (once a week)
4903731649									IUCN SSC member					United Kingdom of Great Britain and Northern Ireland	Male	FrequentlyÂ (once a week)		Not easy	Some information is very easy - the more obscure the journal or subject the more difficult it becomes - I have quite a good reference library but sometimes there are some you can only view the abstract or a reference from another article	Essential	For any Ecological/Biological subject the most up to date referencing is essential - it is the pursuit of knowledge etc	Obscure Herpetological journals, Ibis	I prefer printingÂ out to read	I prefer the original hard copy		No	Never or not available	Never or not available	Never or not available	Never or not available	Infrequently	FrequentlyÂ (once a week)	Sometimes (once a month)	Very frequently (daily)	Very frequently (daily)	Great positive effect	Access to knowledge is always a positive resource - I like to be able to offer the best referenced information I can	Slight negative impact
4903727515			IUCN International NGO Member						IUCN SSC member					Austria	Male	Infrequently		Not at all easy		Essential		Conservation Biology	I prefer printingÂ out to read	I prefer the original hard copy		No	Infrequently	Sometimes (once a month)	FrequentlyÂ (once a week)	Never or not available	Infrequently	Sometimes (once a month)	FrequentlyÂ (once a week)	Very frequently (daily)	Very frequently (daily)	Great positive effect		Great negative impact
4903722785													Red List of Threatened Species Group	Costa Rica	Male	Sometimes (once a month)		Easy		Very important		Revista de Biologia Tropical	I prefer printingÂ out to read	I prefer the original hard copy		Yes	Never or not available	Never or not available	Very frequently (daily)	Never or not available	Sometimes (once a month)	Never or not available	Infrequently	Very frequently (daily)
4903720574									IUCN SSC member							Very frequently (daily)		Easy		Essential		Biological Conservation	I prefer reading on a screen			Yes	Sometimes (once a month)	Infrequently	Very frequently (daily)	Sometimes (once a month)	Infrequently	Never or not available	Infrequently	FrequentlyÂ (once a week)
4903717300									IUCN SSC member					United States of America	Female	Infrequently		Easy		Somewhat important			I prefer printingÂ out to read	I prefer reading on a screen		Yes	Never or not available	Never or not available	Never or not available	Never or not available	Infrequently	Infrequently	FrequentlyÂ (once a week)	FrequentlyÂ (once a week)						I was unaware there was access to literature through the IUCN library.
4903711777									IUCN SSC member					United States of America	Female	Sometimes (once a month)		Very easy		Somewhat important			I prefer reading on a screen	I prefer reading on a screen		Yes	Never or not available	Never or not available	Infrequently	Never or not available	Never or not available	Never or not available	Never or not available	Infrequently
4903707123									IUCN SSC member					Bolivia (Plurinational State of)	Male	Very frequently (daily)		Easy	I receive free email Tablke of Contents for several journals and then write to the authors to get the papers I need. I got ~95% of those I request.	Essential		no single one.	I prefer reading on a screen	I prefer reading on a screen		Yes	Infrequently	Never or not available	Very frequently (daily)	Never or not available	Very frequently (daily)	Never or not available	FrequentlyÂ (once a week)	Very frequently (daily)						My institution gets access to some journals, but this is highly insufficient.
4903704403									IUCN SSC member					United States of America	Male	FrequentlyÂ (once a week)		Easy		Essential		Journal of Wildlife Management	I prefer printingÂ out to read	I prefer the original hard copy		Yes	Never or not available	Never or not available	FrequentlyÂ (once a week)	Never or not available	FrequentlyÂ (once a week)	Sometimes (once a month)	Sometimes (once a month)	Very frequently (daily)
4903703789									IUCN SSC member					Argentina	Female	Very frequently (daily)		Not easy	currently, we do not have access to the vast majority of the paid scientific journals..	Very important		many!	I prefer reading on a screen	I prefer the original hard copy		No	Never or not available	Never or not available	Never or not available	Never or not available	Sometimes (once a month)	Never or not available	FrequentlyÂ (once a week)	Very frequently (daily)	Very frequently (daily)	Moderate positive effect		Moderate negative impact
4903695112														Greece	Male	Sometimes (once a month)		Easy		Very important			I prefer reading on a screen	I prefer the original hard copy		Yes	Infrequently	Infrequently	Sometimes (once a month)	Never or not available	Infrequently	Infrequently	Infrequently	Sometimes (once a month)
4903683849									IUCN SSC member					United States of America	Male	Sometimes (once a month)		Very easy	My University has an excellent collection plus an interlibrary loan process for items they do not have.	Very important			I prefer reading on a screen	I prefer the original hard copy		Yes	Sometimes (once a month)	Never or not available	Sometimes (once a month)	Never or not available	Never or not available	Never or not available	Never or not available	Infrequently
4903681586												IUCN Secretariat staff		Kenya	Male	Sometimes (once a month)		Not easy	The access to some journals are not easy to access need subscription fees and not sure which ones are available at IUCN library	Very important		Global change biology	I prefer reading on a screen	I prefer the original hard copy		No	Never or not available	Never or not available	Infrequently	Never or not available	Never or not available	Never or not available	Infrequently	FrequentlyÂ (once a week)	Sometimes (once a month)	Great positive effect		Slight negative impact		None
4903654535				IUCN National NGO Member										Jordan	Male	Sometimes (once a month)
4903648562			IUCN International NGO Member											United States of America	Male	FrequentlyÂ (once a week)		Not easy		Very important		Nature	I prefer reading on a screen	I prefer the original hard copy		No	Never or not available	Infrequently	Never or not available	Never or not available	Sometimes (once a month)	Never or not available	FrequentlyÂ (once a week)	FrequentlyÂ (once a week)	Frequently (once a week)	Great positive effect		Slight negative impact
4903640571							IUCN CEESP member							Canada	Male	Very frequently (daily)		Very easy	I am an adjunct professor for Simon Fraser University and have access to scientific literature via their library, including online	Essential		Not possible to say. My needs are based on subject	I prefer reading on a screen			Yes	Infrequently	Infrequently	Very frequently (daily)	Never or not available	Infrequently	Never or not available	Never or not available	FrequentlyÂ (once a week)
4903640215									IUCN SSC member					United States of America		FrequentlyÂ (once a week)		Not easy		Very important			I prefer reading on a screen			Yes	FrequentlyÂ (once a week)	Never or not available	Sometimes (once a month)	Infrequently	Infrequently	Infrequently	Infrequently	Sometimes (once a month)
4903637252				IUCN National NGO Member			IUCN CEESP member							Pakistan	Female	Sometimes (once a month)		Not easy	No idea how to access this material.	Essential		Anything to do with Gender, and local communities.	I prefer reading on a screen	I prefer the original hard copy		No	Sometimes (once a month)	Never or not available	Never or not available	Sometimes (once a month)	Never or not available	Infrequently	Never or not available	FrequentlyÂ (once a week)	Sometimes (once a month)	Great positive effect		Moderate negative impact
4903632423									IUCN SSC member					France	Male	FrequentlyÂ (once a week)		Not easy		Very important		Taxonomy, Systematics, conservation journals	I prefer reading on a screen	I prefer the original hard copy		No	Never or not available	Infrequently	Never or not available	Never or not available	Sometimes (once a month)	Never or not available	Sometimes (once a month)	FrequentlyÂ (once a week)	Sometimes (once a month)	Great positive effect		Moderate negative impact
4903631119												IUCN Secretariat staff		Switzerland	Male	Sometimes (once a month)		Not easy	Except few exceptions e.g. Water Policy or other individual articles we can access through the IUCN Library or directly the authors, there are peaks in demand for writing needs where we have to find other ways (e.g. resort to junior staff with personal university access as former students)	Very important	As a Programme, we write on average 2-3 journal articles for which we need an averagely higher amount of scientific references we can access	Global Environmental Change	I prefer printingÂ out to read			No	Sometimes (once a month)	Never or not available	Never or not available	Sometimes (once a month)	Infrequently	Never or not available	Infrequently	FrequentlyÂ (once a week)	Sometimes (once a month)	Moderate positive effect	We would be more efficient and impactful in the non-grey literature papers we write as a Programme	Slight negative impact	Whereas our work is well recognised by donors and other peers in the same sector, to scale up impact, we have to write about our methods and results in some scientific venues, for which we need to research existing literature in order to be published
4903629888			IUCN International NGO Member											United States of America	Female	FrequentlyÂ (once a week)		Not easy	Our organization does not have journal access so I rely on open access journals and author copies.	Very important			I prefer reading on a screen	I prefer reading on a screen		No	Never or not available	Never or not available	Never or not available	Never or not available	Sometimes (once a month)	Never or not available	Sometimes (once a month)	FrequentlyÂ (once a week)	Frequently (once a week)	Great positive effect		Moderate negative impact
4903603737		IUCN Government Agency Member												United States of America	Female	Sometimes (once a month)		Very easy		Essential		Proceedings of the National Academy of Science	I prefer reading on a screen	I prefer the original hard copy		Yes	Infrequently	Never or not available	Very frequently (daily)	Never or not available	Infrequently	Never or not available	Sometimes (once a month)	Very frequently (daily)
4903603405	IUCN State Member													Mali	Male	FrequentlyÂ (once a week)		Not easy	Sometime (frequently) I need scientific literature but I don't know to obtain it.	Very important			I prefer reading on a screen	I prefer reading on a screen		Yes	Infrequently	Never or not available	Infrequently	Infrequently	Never or not available	Infrequently	Sometimes (once a month)	FrequentlyÂ (once a week)						No
4903601704									IUCN SSC member					Germany	Male	Sometimes (once a month)		Easy		Essential			I prefer printingÂ out to read	I prefer the original hard copy		Yes	Infrequently	Never or not available	FrequentlyÂ (once a week)	Never or not available	FrequentlyÂ (once a week)	Infrequently	Sometimes (once a month)	FrequentlyÂ (once a week)
4903599975										IUCN WCEL member				China	Male	Infrequently		Not easy		Somewhat important			I prefer reading on a screen	I prefer the original hard copy		Yes	Sometimes (once a month)	Infrequently	Sometimes (once a month)	Infrequently	Infrequently	Infrequently	Sometimes (once a month)	Infrequently
4903599869									IUCN SSC member					Brazil	Male	Infrequently		Easy	I don't work directly with conservation-related work. However, as a taxonomist, I have collaborated with conservation assessments of the group of my speciality.	Very important			I prefer the original hard copy	I prefer the original hard copy	I would rather use hard copies, but reading on screen (and sometimes printing out to read later) is becoming more and more usual.	Yes	Infrequently	Infrequently	FrequentlyÂ (once a week)	Never or not available	Infrequently	Infrequently	Infrequently	FrequentlyÂ (once a week)
4903595376			IUCN International NGO Member											United States of America	Male	FrequentlyÂ (once a week)		Not easy	Don't have University library access.	Essential	As a Red List Authority I need to be able to access and review cited literature.	Conservation Biology	I prefer reading on a screen	I prefer the original hard copy		No	Never or not available	Sometimes (once a month)	Never or not available	Never or not available	Sometimes (once a month)	Infrequently	FrequentlyÂ (once a week)	Very frequently (daily)	Frequently (once a week)	Great positive effect		Moderate negative impact		Thanks for looking into this! Would be really important to my work
4903591077								IUCN CEM member						Switzerland	Male	Sometimes (once a month)		Very easy		Very important			I prefer reading on a screen	I prefer reading on a screen		Yes	Very frequently (daily)	Infrequently	Very frequently (daily)	Never or not available	Infrequently	Never or not available	Never or not available	Sometimes (once a month)
4903590000									IUCN SSC member					Sri Lanka	Male	FrequentlyÂ (once a week)		Not easy	I am a member of OSG (orchid related group). While I have access to a certain amount of scientific literature, it is difficult to locate literature to orchid-related books and even specialist orchid journals.	Very important		Many orchid-related journals	I prefer the original hard copy	I prefer the original hard copy	I prefer the original hard copy but try to make do with reading on a screen for want of an alternative.	Yes	Never or not available	FrequentlyÂ (once a week)	FrequentlyÂ (once a week)	Infrequently	Sometimes (once a month)	Never or not available	FrequentlyÂ (once a week)	Very frequently (daily)
4903579024									IUCN SSC member					France	Male	FrequentlyÂ (once a week)		Not easy		Very important			I prefer printingÂ out to read	I prefer the original hard copy		No	Never or not available	Never or not available	Infrequently	Never or not available	Infrequently	Infrequently	Sometimes (once a month)	Infrequently	Frequently (once a week)	Moderate positive effect		Moderate negative impact
4903578327										IUCN WCEL member				Argentina	Female	Sometimes (once a month)		Not easy		Very important			I prefer printingÂ out to read	I prefer printingÂ out to read		No	FrequentlyÂ (once a week)	Infrequently	Infrequently	Infrequently	Infrequently	FrequentlyÂ (once a week)	Sometimes (once a month)	FrequentlyÂ (once a week)	Frequently (once a week)	Moderate positive effect		Slight negative impact
4903560586						IUCN CEC member								Switzerland	Female	Never
4903559131													Transboundary Specilaist Group	Tanzania (United Republic of)	Male	Sometimes (once a month)		Easy	we have an internal library network	Very important			I prefer reading on a screen	I prefer printingÂ out to read		Yes	FrequentlyÂ (once a week)	Never or not available	Infrequently	Never or not available	Infrequently	Never or not available	Infrequently	Sometimes (once a month)
4903556430												IUCN Secretariat staff		Switzerland	Male	FrequentlyÂ (once a week)		Easy	either download it directly from the internet or request the IUCN librarian to procure it and share it with me	Very important	Need to access literature related to the work funded by the programme I work for + relevant general conservation literature to keep abreast with changes in the field.	Oryx	I prefer printingÂ out to read	I prefer the original hard copy		No	Sometimes (once a month)	Never or not available	Never or not available	Sometimes (once a month)	Infrequently	Never or not available	Never or not available	FrequentlyÂ (once a week)	Frequently (once a week)	Slight positive effect		Moderate negative impact
4903539117			IUCN International NGO Member	IUCN National NGO Member					IUCN SSC member					United States of America	Male	FrequentlyÂ (once a week)		Easy		Essential			I prefer printingÂ out to read	I prefer reading on a screen		Yes	Sometimes (once a month)	Never or not available	Sometimes (once a month)	Never or not available	Infrequently	Very frequently (daily)	Never or not available	Very frequently (daily)
4903538466									IUCN SSC member					United States of America	Female	Infrequently		Not easy		Very important		Molecular Ecology	I prefer printingÂ out to read	I prefer the original hard copy		No	Never or not available	Never or not available	Infrequently	Never or not available	Sometimes (once a month)	FrequentlyÂ (once a week)	FrequentlyÂ (once a week)	Very frequently (daily)	Infrequently	Moderate positive effect		Slight negative impact
4903536049									IUCN SSC member					Canada	Male	FrequentlyÂ (once a week)		Not easy		Very important		Journal of Wildlife Management	I prefer the original hard copy	I prefer the original hard copy		No	Never or not available	Never or not available	Never or not available	Never or not available	Sometimes (once a month)	FrequentlyÂ (once a week)	Sometimes (once a month)	Very frequently (daily)	Frequently (once a week)	Great positive effect		Moderate negative impact
4903534149													IUCN Conservation Genetics Specialist Group	United States of America	Female	FrequentlyÂ (once a week)		Very easy	I'm at an academic institution that has many subscriptions to journals.	Essential		Molecular ecology--but I already have access to it.	I prefer reading on a screen	I prefer the original hard copy		Yes	FrequentlyÂ (once a week)	Never or not available	Very frequently (daily)	Never or not available	Infrequently	Never or not available	Infrequently	Infrequently
4903526105				IUCN National NGO Member							IUCN WCPA member			Hong Kong, China	Male	Infrequently		Not easy	don't know what are available	Somewhat important		urban protected areas and biodiversity	I prefer printingÂ out to read	I prefer printingÂ out to read		Yes	Sometimes (once a month)	Infrequently	Sometimes (once a month)	Never or not available	Infrequently	Never or not available	Infrequently	Infrequently						No
4903522361											IUCN WCPA member			Venezuela (Bolivarian Republic of)	Male	Sometimes (once a month)		Not easy		Somewhat important		Conservation Biology	I prefer reading on a screen	I prefer reading on a screen		No	Sometimes (once a month)	Infrequently	Never or not available	Never or not available	Infrequently	Never or not available	Sometimes (once a month)	Sometimes (once a month)	Sometimes (once a month)	Moderate positive effect		Moderate negative impact
4903510786										IUCN WCEL member				Guatemala	Female	Never
4903494113									IUCN SSC member					United States of America	Male	Sometimes (once a month)		Easy	I have access to JSTOR, University of Florida Marston Science Library and extensive online sources.	Very important		JStor collection of online journals	I prefer reading on a screen	I prefer the original hard copy		Yes	Never or not available	Infrequently	Sometimes (once a month)	Never or not available	Sometimes (once a month)	Sometimes (once a month)	Sometimes (once a month)	Very frequently (daily)						If IUCN is member to online subscription services (e.g., Springer Verlag, JSTOR), then perhaps it's members and affiliates can have better access, particularly for countries that do not have well-developed library services.
4903491151									IUCN SSC member					Brazil	Male	Infrequently		Easy		Very important		IUCN Otter Specialist Group Bulletin	I prefer printingÂ out to read	I prefer the original hard copy		No	Never or not available	Never or not available	Sometimes (once a month)	Infrequently	Sometimes (once a month)	Infrequently	Infrequently	Infrequently	Infrequently	Slight positive effect		Slight negative impact		No
4903490079			IUCN International NGO Member											United Kingdom of Great Britain and Northern Ireland	Male	FrequentlyÂ (once a week)		Not easy	WCS has some journals but they tend to be US-focused. Otherwise, I ask friends.	Somewhat important		Nature	I prefer reading on a screen	I prefer the original hard copy		Yes	Never or not available	Never or not available	Infrequently	Never or not available	Sometimes (once a month)	Infrequently	Sometimes (once a month)	Infrequently
4903488556									IUCN SSC member					Italy	Male	FrequentlyÂ (once a week)		Not easy		Very important		Marine Ecology Progress Series	I prefer reading on a screen	I prefer the original hard copy		No	Infrequently	Infrequently	Infrequently	Never or not available	Sometimes (once a month)	Sometimes (once a month)	FrequentlyÂ (once a week)	Very frequently (daily)	Sometimes (once a month)	Moderate positive effect		Slight negative impact
4903486147								IUCN CEM member						United States of America		FrequentlyÂ (once a week)		Very easy	I have access though my institution	Very important			I prefer reading on a screen	I prefer reading on a screen		Yes	FrequentlyÂ (once a week)	Never or not available	FrequentlyÂ (once a week)	Never or not available	Infrequently	Infrequently	Sometimes (once a month)	FrequentlyÂ (once a week)
4903481240									IUCN SSC member					Brazil	Male	Very frequently (daily)		Easy		Essential		CSG Newsletter		I prefer the original hard copy		No	Never or not available	Infrequently	Never or not available	Infrequently	Infrequently	Sometimes (once a month)	FrequentlyÂ (once a week)	Very frequently (daily)	Very frequently (daily)	Great positive effect		Slight negative impact		No.
4903480536									IUCN SSC member					Canada	Female	FrequentlyÂ (once a week)		Very easy		Essential		Conservation Biology	I prefer printingÂ out to read	I prefer the original hard copy		Yes	Sometimes (once a month)	Infrequently	Very frequently (daily)	Never or not available	Infrequently	Infrequently	Infrequently	FrequentlyÂ (once a week)
4903479569									IUCN SSC member					United States of America	Male	Sometimes (once a month)		Very easy	I have access to a university library online	Essential		Choosing 1 is impossible	I prefer the original hard copy	I prefer the original hard copy		Yes	Sometimes (once a month)	Never or not available	Sometimes (once a month)	Never or not available	Infrequently	Never or not available	Never or not available	Infrequently
4903474439			IUCN International NGO Member											Turkey	Female	Sometimes (once a month)
4903469838													University teacher regularly working on IUCN Mediterranean projects	Algeria	Female	FrequentlyÂ (once a week)		Not easy	Limited internet access to several scientific journals	Very important	The need to have scientifically based data is a very important to present the best argument possible for assessment work.	Biodiversity and Conservation; Journal of Vegtation Science	I prefer reading on a screen	I prefer the original hard copy		Yes	Sometimes (once a month)	Never or not available	Sometimes (once a month)	Never or not available	Infrequently	Never or not available	Infrequently	FrequentlyÂ (once a week)
4903466102			IUCN International NGO Member						IUCN SSC member					United States of America	Male	FrequentlyÂ (once a week)		Easy		Essential		I have easy access to most of what I need	I prefer reading on a screen	I prefer the original hard copy		Yes	Very frequently (daily)	Never or not available	Very frequently (daily)	Never or not available	Infrequently	Sometimes (once a month)	Never or not available	Infrequently						nope
4903460895									IUCN SSC member					Peru	Male	Never
4903458502											IUCN WCPA member			United Kingdom of Great Britain and Northern Ireland	Male	FrequentlyÂ (once a week)		Not easy		Very important		there are so many impossible to select one	I prefer reading on a screen	I prefer reading on a screen		Yes	Sometimes (once a month)	Never or not available	Sometimes (once a month)	Never or not available	Infrequently	Sometimes (once a month)	Never or not available	FrequentlyÂ (once a week)
4903452734												IUCN Secretariat staff		Switzerland	Female	Sometimes (once a month)		Not easy		Somewhat important		Biodiversity and Conservation	I prefer printingÂ out to read	I prefer the original hard copy		No	Never or not available	Infrequently	Infrequently	Infrequently	Never or not available	Never or not available	Infrequently	Sometimes (once a month)	Sometimes (once a month)	Moderate positive effect		Slight negative impact
4903446374										IUCN WCEL member	IUCN WCPA member		also ELC consultant from time to time	United States of America	Female	Very frequently (daily)		Easy		Essential		Environmental Policy and Law	I prefer printingÂ out to read	I prefer the original hard copy		Yes	Infrequently	Infrequently	Sometimes (once a month)	Infrequently	Sometimes (once a month)	Infrequently	Infrequently	FrequentlyÂ (once a week)						Let me start by saying that libraries of a technical organization is its backbone and foundation for research and spreading knowledge. I frequently use IUCN publications, including periodically referring colleagues to my work in your library, and was shocked recently to see one such book, where I was the lead author, showing authors alphabetically, in this case, putting a research assistant first…
4903440862									IUCN SSC member					United States of America	Male	Infrequently		Very easy	I am a student at a university that has access to Web of Science and virtually every scientific journal I have ever needed to conslut.	Somewhat important	I do very little IUCN-related work in my current capacity but if I was more involved (e.g., chair of a SSC or Red List Authority member) I would consider easy access to scientific literature ESSENTIAL!	Biological Conservation	I prefer reading on a screen	I prefer the original hard copy		Yes	Infrequently	Never or not available	Infrequently	Never or not available	Never or not available	Never or not available	Never or not available	Never or not available
4903435585									IUCN SSC member					South Africa	Female	FrequentlyÂ (once a week)		Not at all easy	I do not have access to a Univesrity therefore cannot download any literature that is not supplied free	Very important		Animal Behaviour and Zoo Biology	I prefer the original hard copy	I prefer the original hard copy		No	Never or not available	Never or not available	Never or not available	Never or not available	Never or not available	Never or not available	FrequentlyÂ (once a week)	FrequentlyÂ (once a week)	Frequently (once a week)	Great positive effect		Slight negative impact
4903433714									IUCN SSC member					Malaysia	Female	FrequentlyÂ (once a week)		Not easy	If I was not affiliated with a University, it would be even more difficult.	Essential		Unsure.	I prefer reading on a screen	I prefer the original hard copy		Yes	Infrequently	Never or not available	Very frequently (daily)	Never or not available	FrequentlyÂ (once a week)	Never or not available	Sometimes (once a month)	FrequentlyÂ (once a week)
4903430007									IUCN SSC member					Mexico	Male	FrequentlyÂ (once a week)		Not at all easy	Universities in Mexico do not have easy access to scientific literature.	Essential	Keeping updated on the latest findings, methods and concepts is essential.	Ecology	I prefer printingÂ out to read	I prefer the original hard copy		Yes	Never or not available	Infrequently	FrequentlyÂ (once a week)	Never or not available	Infrequently	Never or not available	Infrequently	Very frequently (daily)						A large, international organization like the IUCN should be a strong advocate of open access to scientific literature and data. Its mission justifies clearly the need for making all scientific knowledge freely available, especially in countries with high biodiversity and poor access to pay walls.
4903425703					IUCN Affiliate Member									Botswana	Female	FrequentlyÂ (once a week)		Easy		Very important			I prefer reading on a screen	I prefer the original hard copy		Yes	Sometimes (once a month)	Never or not available	FrequentlyÂ (once a week)	Sometimes (once a month)	Never or not available	Never or not available	Never or not available	FrequentlyÂ (once a week)						NO
4903423636									IUCN SSC member					Canada	Female	Sometimes (once a month)		Easy		Essential		Giraffa	I prefer printingÂ out to read			Yes	FrequentlyÂ (once a week)	Never or not available	Sometimes (once a month)	Never or not available	Infrequently	Never or not available	Sometimes (once a month)	Infrequently
4903422508						IUCN CEC member								Switzerland	Female	Sometimes (once a month)		Not easy		Very important			I prefer printingÂ out to read	I prefer the original hard copy		No	Never or not available	Infrequently	Never or not available	Infrequently	Never or not available	Sometimes (once a month)	Never or not available	Very frequently (daily)	Very frequently (daily)	Great positive effect		Slight negative impact
4903422397						IUCN CEC member					IUCN WCPA member			Brazil	Female	FrequentlyÂ (once a week)		Easy	I am enrolled at University so have access to scientific journals but not for long.	Very important		Conservation Biology	I prefer printingÂ out to read	I prefer the original hard copy		Yes	Infrequently	Never or not available	FrequentlyÂ (once a week)	Never or not available	Sometimes (once a month)	Never or not available	Never or not available	FrequentlyÂ (once a week)
4903420073									IUCN SSC member					United States of America	Male	Sometimes (once a month)		Not easy		Somewhat important			I prefer reading on a screen	I prefer printingÂ out to read		Yes	Sometimes (once a month)	Sometimes (once a month)	Sometimes (once a month)	Never or not available	Infrequently	Never or not available	Sometimes (once a month)	Sometimes (once a month)
4903419242									IUCN SSC member					Spain	Male	Very frequently (daily)		Not easy	Availibility of publications in open access PDF format is very important.	Essential			I prefer reading on a screen	I prefer reading on a screen		No	Never or not available	Never or not available	Never or not available	Never or not available	Very frequently (daily)	Never or not available	Sometimes (once a month)	Very frequently (daily)	Very frequently (daily)	No effect at allÂ	Not affliliated with an institution.	Great negative impact		IUCN should try to make all literature of which copies are in their library freely available online. Many of the reports are older and would have no copyright implications. This would be a major service to the conservation community all over the world. At present, when searchring for rhinoceros (for instance), only 4 out of many publications can actually be accessed through the IUCN library syste…
4903418647				IUCN National NGO Member			IUCN CEESP member							Costa Rica	Male	Sometimes (once a month)		Not easy	Much of what I need is behind paywalls	Essential		Don't know. I can't access them to even know.	I prefer reading on a screen	I prefer reading on a screen		No	Never or not available	Never or not available	Never or not available	Never or not available	Never or not available	Never or not available	Never or not available	FrequentlyÂ (once a week)	Frequently (once a week)	Great positive effect		Moderate negative impact
4903416532									IUCN SSC member					United States of America	Male	FrequentlyÂ (once a week)		Easy		Essential		can't pick one (many conservation journals)	I prefer reading on a screen	I prefer reading on a screen		Yes	Never or not available	Never or not available	FrequentlyÂ (once a week)	Never or not available	Sometimes (once a month)	Infrequently	Infrequently	FrequentlyÂ (once a week)						My institutional access is going to end and I am very worried about losing access to much of the literature.
4903410187											IUCN WCPA member			United States of America	Female	Sometimes (once a month)
4903408689					IUCN Affiliate Member									Australia	Male	Very frequently (daily)		Very easy	I have both physical and on-line access to the library of the University of Melbourne	Essential		I can access everything I need	I prefer reading on a screen	I prefer the original hard copy		Yes	Very frequently (daily)	Infrequently	Very frequently (daily)	Never or not available	Infrequently	Never or not available	Never or not available	Infrequently
4903397423								IUCN CEM member						Namibia	Male	Sometimes (once a month)		Not easy	As I have only started with IUCN related work and need to find my feet, I am not really in a position to give an opinion	Somewhat important	See above		I prefer the original hard copy	I prefer the original hard copy		No	Never or not available	Never or not available	Never or not available	Never or not available	Infrequently	Infrequently	Infrequently	Sometimes (once a month)	Infrequently	Slight positive effect	As I am reluctant to work online I would make very little use of online literature, only when I am not able to get a hard copy or when in time constraint would I use the internet	Slight negative impact		I a m new to IUCN and would have preferred to get some experience before I had to take part in a survey.
4903396073								IUCN CEM member						Pakistan	Male	FrequentlyÂ (once a week)		Not easy		Essential			I prefer the original hard copy			Yes	FrequentlyÂ (once a week)	Sometimes (once a month)	FrequentlyÂ (once a week)	Never or not available	Sometimes (once a month)	Infrequently	Never or not available	Infrequently
4903395477									IUCN SSC member					Indonesia	Female	FrequentlyÂ (once a week)		Very easy		Very important			I prefer printingÂ out to read	I prefer reading on a screen		Yes	Infrequently	Infrequently	Sometimes (once a month)	Infrequently	Sometimes (once a month)	Infrequently	Infrequently	FrequentlyÂ (once a week)
4903394981								IUCN CEM member	IUCN SSC member		IUCN WCPA member	IUCN Secretariat staff		United Kingdom of Great Britain and Northern Ireland	Female	FrequentlyÂ (once a week)
4903393168											IUCN WCPA member		I work with staff in IUCN in producing IUCN publications	United Kingdom of Great Britain and Northern Ireland	Male	FrequentlyÂ (once a week)		Not easy	Many references in journals are not free to view	Essential	To ensure that the publications that I am working on are as up to date as possible it is essential to be able to access the latest literature	I don't think there is just one journal	I prefer reading on a screen	I prefer the original hard copy		Yes	Infrequently	Never or not available	Infrequently	Never or not available	FrequentlyÂ (once a week)	Infrequently	Sometimes (once a month)	Sometimes (once a month)						I am happy to have taken part in this survey but I was not aware that IUCN library facilities might be available to me.
4903392882									IUCN SSC member					United States of America	Male	Very frequently (daily)		Not easy	I have access to a couple journals through my institute but not many	Very important		Molecular Ecology	I prefer reading on a screen	I prefer the original hard copy		Yes	FrequentlyÂ (once a week)	Sometimes (once a month)	FrequentlyÂ (once a week)	Never or not available	Very frequently (daily)	Sometimes (once a month)	Sometimes (once a month)	Very frequently (daily)
4903391601									IUCN SSC member					Mexico	Male	FrequentlyÂ (once a week)		Easy		Essential			I prefer reading on a screen	I prefer the original hard copy		Yes	Sometimes (once a month)	Infrequently	Very frequently (daily)	Infrequently	Never or not available	Never or not available	Sometimes (once a month)	FrequentlyÂ (once a week)
4903389457								IUCN CEM member			IUCN WCPA member			Kazakhstan	Female	Sometimes (once a month)		Easy		Very important		some of them	I prefer reading on a screen			No	Sometimes (once a month)	Infrequently	Never or not available	Sometimes (once a month)	Sometimes (once a month)	FrequentlyÂ (once a week)	FrequentlyÂ (once a week)	Very frequently (daily)	Infrequently	Moderate positive effect		Slight negative impact		no
4903388231									IUCN SSC member					United States of America	Male	Very frequently (daily)		Very easy		Essential		Ecology	I prefer printingÂ out to read	I prefer the original hard copy		Yes	Never or not available	Never or not available	Very frequently (daily)	Never or not available	Infrequently	FrequentlyÂ (once a week)	Never or not available	Infrequently
4903387398									IUCN SSC member					Indonesia	Male	FrequentlyÂ (once a week)		Easy		Essential		Plos One	I prefer the original hard copy	I prefer the original hard copy		No	Never or not available	Never or not available	FrequentlyÂ (once a week)	Never or not available	FrequentlyÂ (once a week)	Infrequently	Infrequently	FrequentlyÂ (once a week)	Frequently (once a week)	Great positive effect		Moderate negative impact
4903384764									IUCN SSC member					United States of America	Male	FrequentlyÂ (once a week)		Easy		Very important		Chelonian Conservation and Biology	I prefer reading on a screen	I prefer the original hard copy		Yes	Never or not available	Never or not available	FrequentlyÂ (once a week)	Never or not available	Sometimes (once a month)	FrequentlyÂ (once a week)	Sometimes (once a month)	Sometimes (once a month)
4903382172								IUCN CEM member			IUCN WCPA member			Germany	Female	Very frequently (daily)		Easy	I am currently affiliated with a university so I have access to some journals. For those that I cannot access, I use Sci-Hub.	Essential		Ambio	I prefer printingÂ out to read	I prefer the original hard copy		Yes	Sometimes (once a month)	Never or not available	Very frequently (daily)	Never or not available	Infrequently	Never or not available	Infrequently	FrequentlyÂ (once a week)
4903381425									IUCN SSC member					Argentina	Male	FrequentlyÂ (once a week)		Easy		Essential		Systematic Botany	I prefer printingÂ out to read			Yes	Sometimes (once a month)	Infrequently	Very frequently (daily)	Infrequently	FrequentlyÂ (once a week)	Very frequently (daily)	Sometimes (once a month)	Very frequently (daily)
4903375304												IUCN Secretariat staff		Ecuador	Male	FrequentlyÂ (once a week)		Not easy	No free access to scientific journals	Very important	We are science based, we should back our technical decisions and strategies based on up to date science.	elsevier	I prefer reading on a screen	I prefer reading on a screen		No	Sometimes (once a month)	Infrequently	Never or not available	Never or not available	Never or not available	Never or not available	Sometimes (once a month)	FrequentlyÂ (once a week)	Frequently (once a week)	Great positive effect		Great negative impact
4903368646									IUCN SSC member					South Africa	Male	Sometimes (once a month)		Not easy	I have access to some journals through my employers, but not all.	Essential			I prefer reading on a screen	I prefer reading on a screen		Yes	Sometimes (once a month)	Never or not available	FrequentlyÂ (once a week)	Never or not available	FrequentlyÂ (once a week)	Sometimes (once a month)	Infrequently	FrequentlyÂ (once a week)
4903366902										IUCN WCEL member				United States of America	Female	FrequentlyÂ (once a week)		Not at all easy	I am with an NGO and don't have access to the University online libraries that others might have.	Essential	It is especially important for NGOs to have credibility, and the most up to date science helps provide that.	Science (because it is the most widely read and publicly understandable)	I prefer printingÂ out to read	I prefer the original hard copy	I am happy to obtain materials however I can though.	No	Never or not available	Infrequently	Never or not available	Never or not available	Infrequently	Never or not available	Infrequently	FrequentlyÂ (once a week)	Frequently (once a week)	Great positive effect		Moderate negative impact
4903364138											IUCN WCPA member			Brazil	Male	Infrequently		Not easy		Somewhat important		Nature	I prefer reading on a screen	I prefer the original hard copy		No	Sometimes (once a month)	Infrequently	Never or not available	Never or not available	Infrequently	Sometimes (once a month)	Sometimes (once a month)	FrequentlyÂ (once a week)	Sometimes (once a month)	Moderate positive effect		Slight negative impact
4903363370													privat	Germany	Male	Never
4903359657									IUCN SSC member					Russian Federation	Male	Infrequently		Easy		Somewhat important		Jpornal of Ichtghyology	I prefer reading on a screen			Yes	FrequentlyÂ (once a week)	FrequentlyÂ (once a week)	Infrequently	Never or not available	FrequentlyÂ (once a week)	Never or not available	FrequentlyÂ (once a week)	Sometimes (once a month)						No
4903348869							IUCN CEESP member							Pakistan	Female	FrequentlyÂ (once a week)		Not easy		Somewhat important			I prefer the original hard copy	I prefer printingÂ out to read		Yes	FrequentlyÂ (once a week)	Sometimes (once a month)	Very frequently (daily)	Infrequently	Infrequently	Sometimes (once a month)	Sometimes (once a month)	Very frequently (daily)
4903348358													IUCN CBSG	United States of America	Female	FrequentlyÂ (once a week)
4903339591									IUCN SSC member					United Kingdom of Great Britain and Northern Ireland	Male	FrequentlyÂ (once a week)		Very easy	I work in a University.	Essential	IUCN work is evidence-based, and most evidence is found in the primary scientific literature.	N/A - I have access to all.	I prefer reading on a screen	I prefer reading on a screen	Tablet.	Yes	Sometimes (once a month)	Never or not available	Very frequently (daily)	Never or not available	FrequentlyÂ (once a week)	Infrequently	Never or not available	FrequentlyÂ (once a week)
4903337654									IUCN SSC member					Canada	Female	FrequentlyÂ (once a week)		Not easy	I am not affiliated with an academic institution, and access to certain journals is through the kindness of a colleague	Essential		Sorry, but just one wouldn't address the issue.	I prefer reading on a screen	I prefer the original hard copy		No	Never or not available	Infrequently	Never or not available	Never or not available	Infrequently	Never or not available	FrequentlyÂ (once a week)	FrequentlyÂ (once a week)	Frequently (once a week)	Great positive effect		Great negative impact	The pace of data generation is extremely high and it is difficult to keep up with what is happening on the front lines of conservation research without formal IUCN access to literature.
4903335605	IUCN State Member													France	Male	Sometimes (once a month)		Not easy		Somewhat important		journal of wildlife diseases	I prefer reading on a screen	I prefer reading on a screen		No	Sometimes (once a month)	Sometimes (once a month)	Never or not available	Never or not available	Infrequently	Never or not available	Sometimes (once a month)	Sometimes (once a month)	Sometimes (once a month)	Slight positive effect		Slight negative impact
4903334457									IUCN SSC member					Colombia	Female	FrequentlyÂ (once a week)		Not easy	The Institution I'm based at doesn't have access to most of the journals that are not open access.	Essential	A large portion of my work is to compile scientific literature to revise and complement red list assessments		I prefer reading on a screen	I prefer the original hard copy		Yes	Infrequently	Never or not available	Sometimes (once a month)	Never or not available	Never or not available	Sometimes (once a month)	Infrequently	Sometimes (once a month)						No
4903332265													Professor of Wildlife	Pakistan	Male	Sometimes (once a month)		Not easy		Very important		Wildlife Research, Conservation Biology	I prefer printingÂ out to read	I prefer the original hard copy		No	Infrequently	Infrequently	Sometimes (once a month)	Infrequently	FrequentlyÂ (once a week)	Never or not available	Infrequently	Very frequently (daily)	Frequently (once a week)	Moderate positive effect		Moderate negative impact		IUCN shall have mutual agreements with local institutions & individuals for exchange of publications
4903329556									IUCN SSC member					Mexico	Female	Sometimes (once a month)
4903320614											IUCN WCPA member			Italy	Male	Sometimes (once a month)		Not easy		Essential		Parks	I prefer reading on a screen	I prefer the original hard copy		Yes	Sometimes (once a month)	FrequentlyÂ (once a week)	FrequentlyÂ (once a week)	Infrequently	Infrequently	Infrequently	Sometimes (once a month)	Sometimes (once a month)
4903319958									IUCN SSC member					United States of America	Male	FrequentlyÂ (once a week)		Easy	My institution's library system subscribes to the vast majority of relevant peer-reviewed journals, and those that they don't can usually be obtained via an inter-library loan system.	Essential	Being fully informed is essential to fulfilling my role in IUCN-related work.		I prefer reading on a screen	I prefer reading on a screen		Yes	Very frequently (daily)	Never or not available	Very frequently (daily)	Never or not available	Infrequently	Sometimes (once a month)	Sometimes (once a month)	Sometimes (once a month)
4903315272									IUCN SSC member					United Arab Emirates	Female	FrequentlyÂ (once a week)		Not easy		Essential		conservation genetics	I prefer reading on a screen	I prefer reading on a screen		No	Never or not available	Never or not available	Never or not available	Never or not available	Infrequently	Never or not available	Infrequently	FrequentlyÂ (once a week)	Frequently (once a week)	Great positive effect		Slight negative impact
4903306952									IUCN SSC member		IUCN WCPA member			United States of America	Male	FrequentlyÂ (once a week)		Not easy		Essential		Too many to choose just one.	I prefer reading on a screen	I prefer printingÂ out to read		No	Never or not available	Infrequently	Never or not available	Never or not available	Sometimes (once a month)	Infrequently	Infrequently	FrequentlyÂ (once a week)	Frequently (once a week)	Moderate positive effect		Moderate negative impact		No
4903306559									IUCN SSC member					United States of America	Male	FrequentlyÂ (once a week)		Easy		Very important			I prefer reading on a screen	I prefer the original hard copy		Yes	Never or not available	Never or not available	FrequentlyÂ (once a week)	Never or not available	Never or not available	Sometimes (once a month)	Infrequently	FrequentlyÂ (once a week)						No.
4903293954			IUCN International NGO Member											United States of America	Female	Sometimes (once a month)		Not easy		Somewhat important			I prefer reading on a screen	I prefer printingÂ out to read		Yes	Infrequently	Never or not available	Sometimes (once a month)	Never or not available	Never or not available	Never or not available	Infrequently	Sometimes (once a month)
4903293313									IUCN SSC member					Brazil	Male	FrequentlyÂ (once a week)		Easy	More or less easy since some scientific journals and some old scientific journals editionS are hard to be accessed using my current provider (CAPES PERIODICOS, BRAZIL).	Essential	Since we deal with endangered species, any information about them (old and new) are crucial if one needs to write a report about them.	Taxon - all editions - and other publications by the IAPT - International Association for Plant Taxonomy	I prefer printingÂ out to read	I prefer printingÂ out to read		Yes	FrequentlyÂ (once a week)	Infrequently	Very frequently (daily)	Never or not available	Infrequently	Never or not available	Infrequently	Sometimes (once a month)
4903290349									IUCN SSC member					Malaysia	Female	Infrequently		Easy		Very important			I prefer reading on a screen	I prefer printingÂ out to read		Yes	Sometimes (once a month)	Infrequently	Sometimes (once a month)	Never or not available	Never or not available	Sometimes (once a month)	Sometimes (once a month)	Sometimes (once a month)
4903286352									IUCN SSC member					Italy	Male	FrequentlyÂ (once a week)		Not easy	Several, in particular recent papers, can be download paying a fee.	Very important		Elsevier and Wileys editors	I prefer printingÂ out to read	I prefer the original hard copy		No	FrequentlyÂ (once a week)	FrequentlyÂ (once a week)	Sometimes (once a month)	Sometimes (once a month)	Sometimes (once a month)	Sometimes (once a month)	Sometimes (once a month)	Infrequently	Frequently (once a week)	Great positive effect		Moderate negative impact
4903277023						IUCN CEC member					IUCN WCPA member			Italy	Male	Infrequently
4903272155													Member of IUCN SSC Fresh Water Plants Specialist Group	Botswana	Female	FrequentlyÂ (once a week)		Not easy	University of Botswana has limited their subscription to academic journals. Vegetation and fresh water ecology seem to be low priority items.	Very important		will let you know next time I'm searching for an article!	I prefer printingÂ out to read	I prefer the original hard copy	But I like to do my initial survey for information beofre printing anything or ordering books	Yes	Sometimes (once a month)	Never or not available	FrequentlyÂ (once a week)	Never or not available	Infrequently	Never or not available	Infrequently	Very frequently (daily)
4903269755									IUCN SSC member					United States of America	Male	FrequentlyÂ (once a week)		Very easy		Very important		PLOS One	I prefer reading on a screen	I prefer the original hard copy		Yes	Never or not available	Never or not available	Sometimes (once a month)	Never or not available	Sometimes (once a month)	Never or not available	Sometimes (once a month)	Sometimes (once a month)						no
4903269675									IUCN SSC member					Colombia	Male	FrequentlyÂ (once a week)		Easy	I got access to many libraries and databases through my institution, or by asking foreign colleagues.	Very important	Assessment of species requires a lot of information, the more recent the better	Journal of Mammalogy (but I already have access to it)	I prefer reading on a screen	I prefer the original hard copy		Yes	Infrequently	Infrequently	FrequentlyÂ (once a week)	Infrequently	Sometimes (once a month)	Very frequently (daily)	Sometimes (once a month)	Very frequently (daily)
4903268955									IUCN SSC member					Argentina	Male	Infrequently
4903268394									IUCN SSC member		IUCN WCPA member			United Kingdom of Great Britain and Northern Ireland	Male	Sometimes (once a month)
4903265682									IUCN SSC member					France	Male	Sometimes (once a month)		Easy		Very important			I prefer reading on a screen	I prefer the original hard copy		Yes	Never or not available	Never or not available	Sometimes (once a month)	Never or not available	Infrequently	Never or not available	Infrequently	Sometimes (once a month)
4903260669	IUCN State Member	IUCN Government Agency Member	IUCN International NGO Member	IUCN National NGO Member	IUCN Affiliate Member	IUCN CEC member	IUCN CEESP member	IUCN CEM member	IUCN SSC member	IUCN WCEL member	IUCN WCPA member	IUCN Secretariat staff		Madagascar	Male	Sometimes (once a month)		Not easy		Essential	Because it's facilitate to think about all of the theme that IUCN want to give our suggestion about publication and others	journal about the protected areas, species journal	I prefer printingÂ out to read	I prefer the original hard copy	I need if possible in the same times electronic version and the original hard copy	No	Never or not available	Sometimes (once a month)	Sometimes (once a month)	FrequentlyÂ (once a week)	FrequentlyÂ (once a week)	Infrequently	Sometimes (once a month)	Sometimes (once a month)	Frequently (once a week)	Moderate positive effect		Slight negative impact		I need if possible access free for the scientific publication to work related IUCN
4903258043									IUCN SSC member					South Africa	Male	Infrequently		Not easy	I am retired and therefore do not have institutional access to papers	Somewhat important		Conservation Biology	I prefer reading on a screen	I prefer the original hard copy		No	Never or not available	Never or not available	Never or not available	Never or not available	Infrequently	Infrequently	Infrequently	Never or not available	Infrequently	Moderate positive effect		Moderate negative impact
4903256030												IUCN Secretariat staff		Switzerland	Male	Never
4903255333					IUCN Affiliate Member									South Africa	Male	Never
4903255091									IUCN SSC member					India	Male	FrequentlyÂ (once a week)		Easy		Very important		Journal of Threatened Taxa	I prefer printingÂ out to read	I prefer the original hard copy		No	Never or not available	Never or not available	Never or not available	Infrequently	Infrequently	Sometimes (once a month)	Infrequently	Very frequently (daily)	Frequently (once a week)	Moderate positive effect	Presently I use my own financial resource to fund all my research or services I provide as referee or consultant. A new arrangement will reduce the burden.	Slight negative impact		IUCN library services should be strengthened and remain accessible to its members always.
4903253876									IUCN SSC member					Japan	Male	FrequentlyÂ (once a week)		Not easy		Very important		TAXON	I prefer printingÂ out to read	I prefer the original hard copy		No	Infrequently	Never or not available	Never or not available	Never or not available	Infrequently	Sometimes (once a month)	Sometimes (once a month)	FrequentlyÂ (once a week)	Never	Moderate positive effect		Moderate negative impact
4903253677								IUCN CEM member						Germany	Male	FrequentlyÂ (once a week)		Easy		Very important		There is not one single largest impact journal	I prefer reading on a screen	I prefer the original hard copy		Yes	Sometimes (once a month)	Never or not available	Sometimes (once a month)	Never or not available	Never or not available	Never or not available	Infrequently	FrequentlyÂ (once a week)						No
4903252816									IUCN SSC member					Colombia	Male	Sometimes (once a month)		Not easy		Very important			I prefer printingÂ out to read	I prefer the original hard copy		No	Never or not available	Infrequently	Never or not available	Never or not available	Sometimes (once a month)	Never or not available	Sometimes (once a month)	Sometimes (once a month)		Moderate positive effect		Moderate negative impact
4903251222				IUCN National NGO Member	IUCN Affiliate Member		IUCN CEESP member							Argentina	Male	Sometimes (once a month)		Not easy		Very important			I prefer printingÂ out to read	I prefer printingÂ out to read		No	Infrequently	Infrequently	Sometimes (once a month)	Infrequently	Infrequently	Infrequently	Never or not available	Sometimes (once a month)	Sometimes (once a month)	Slight positive effect		Moderate negative impact
4903250312									IUCN SSC member					Botswana	Female	Very frequently (daily)
4903247971									IUCN SSC member					Slovenia	Male	Sometimes (once a month)		Easy		Very important		Animal ecology, animal behavior, ecological letter, biology, ecology,...	I prefer the original hard copy	I prefer the original hard copy		No	Infrequently	Sometimes (once a month)	Never or not available	Never or not available	Infrequently	Infrequently	Infrequently	Infrequently	Sometimes (once a month)	Moderate positive effect		Slight negative impact
4903246205									IUCN SSC member					Canada	Male	Sometimes (once a month)		Very easy	I have access through my university	Essential		Conservation Biology	I prefer reading on a screen	I prefer reading on a screen		Yes	Infrequently	Never or not available	Sometimes (once a month)	Never or not available	Never or not available	Never or not available	Never or not available	Sometimes (once a month)
4903246197									IUCN SSC member				IUCN SSC member	India	Female	Sometimes (once a month)		Not easy		Essential			I prefer reading on a screen	I prefer reading on a screen		Yes	Very frequently (daily)	Never or not available	FrequentlyÂ (once a week)	Never or not available	Infrequently	Infrequently	Sometimes (once a month)	Very frequently (daily)
4903245467									IUCN SSC member					Argentina	Male	Sometimes (once a month)		Easy		Essential		conservation biology	I prefer the original hard copy	I prefer the original hard copy		Yes	Very frequently (daily)	Infrequently	Very frequently (daily)	Never or not available	Sometimes (once a month)	Never or not available	Infrequently	Never or not available
4903245043		IUCN Government Agency Member									IUCN WCPA member			United States of America	Female	FrequentlyÂ (once a week)
4903243945														United States of America	Female	Very frequently (daily)		Very easy	I am a university student, and we have access through the library system.	Very important			I prefer printingÂ out to read	I prefer the original hard copy		Yes	Very frequently (daily)	Never or not available	Very frequently (daily)	Never or not available	Never or not available	Never or not available	Infrequently	Infrequently
4903241807											IUCN WCPA member			United States of America	Female	FrequentlyÂ (once a week)		Easy	I work at a small university. We have access to some resources but not many journals in this field.	Very important		Human dimensions of wildlife	I prefer printingÂ out to read	I prefer the original hard copy		Yes	Very frequently (daily)	Infrequently	FrequentlyÂ (once a week)	Sometimes (once a month)	Never or not available	Sometimes (once a month)	Never or not available	Sometimes (once a month)
4903238843									IUCN SSC member					Germany	Male	FrequentlyÂ (once a week)		Easy		Very important		Ostrich	I prefer reading on a screen	I prefer reading on a screen		Yes	Very frequently (daily)	Infrequently	FrequentlyÂ (once a week)	FrequentlyÂ (once a week)	Infrequently	Sometimes (once a month)	Infrequently	Sometimes (once a month)						No, thank you.
4903237515											IUCN WCPA member			Brazil	Male	Sometimes (once a month)		Not easy		Essential		Conservation biology	I prefer reading on a screen	I prefer printingÂ out to read		Yes	Never or not available	Infrequently	Very frequently (daily)	Never or not available	Never or not available	Never or not available	Infrequently	Infrequently
4903235404									IUCN SSC member					South Africa	Male	Infrequently		Not easy	Unless the information is freely available on the Internet, it is not readily available to me owing to library constraints.	Essential	Red List decisions should be made on the best available information.		I prefer reading on a screen	I prefer reading on a screen		No	Never or not available	Never or not available	Never or not available	Never or not available	Infrequently	Infrequently	Never or not available	Infrequently	Sometimes (once a month)	Great positive effect	It would decrease time taken trying to obtain scientific literature direct from authors and would broaden the scope of access to beyond Google searches.	Moderate negative impact	I don't have institutional access to scientific literature online.
4903231663									IUCN SSC member					Madagascar	Male	FrequentlyÂ (once a week)
4903227192									IUCN SSC member					United States of America	Male	Sometimes (once a month)		Easy		Essential		Conservation Biology	I prefer printingÂ out to read	I prefer the original hard copy		Yes	Sometimes (once a month)	Infrequently	Infrequently	Never or not available	Infrequently	Infrequently	Never or not available	FrequentlyÂ (once a week)
4903225122									IUCN SSC member					Puerto Rico, United States of America	Male	FrequentlyÂ (once a week)		Not easy	I have to bother other people or use researchgate website	Very important		to many, but mostly on BioOne	I prefer reading on a screen	I prefer reading on a screen		No	Sometimes (once a month)	Infrequently	Never or not available	Never or not available	Infrequently	Never or not available	Sometimes (once a month)	Sometimes (once a month)	Sometimes (once a month)	Great positive effect		Slight negative impact		It would be great to have more access to literature and also to interlibrary loans when needed PhD Dissertations and MS thesis often available online are greatly valuable
4903221832													IUCN National Comittee Secretary	Switzerland	Male	Infrequently		Easy	We have a library at Pro Natura, and then there's the internet. Besides, I don't need much scientifci literature to do my IUCN-related work.	Somewhat important		science	I prefer the original hard copy	I prefer the original hard copy		No	Sometimes (once a month)	Never or not available	Never or not available	Never or not available	Sometimes (once a month)	Never or not available	Never or not available	Sometimes (once a month)	Sometimes (once a month)	Moderate positive effect		Slight negative impact		Access is more important to my other work (IUCN member Pro Natura)
4903218560		IUCN Government Agency Member												Botswana	Male	FrequentlyÂ (once a week)		Not easy		Very important		Journal of Environmental Health	I prefer reading on a screen			Yes	Never or not available	Never or not available	Never or not available	Never or not available	Sometimes (once a month)	Sometimes (once a month)	Never or not available	Very frequently (daily)						No
4903215465													IUCN Council Member	Georgia	Female	Infrequently		Not easy	Limited access to scientific literature online	Very important		Environmental Science and Policy	I prefer printingÂ out to read	I prefer the original hard copy		No	Never or not available	Infrequently	Never or not available	Never or not available	Never or not available	Never or not available	FrequentlyÂ (once a week)	Very frequently (daily)	Sometimes (once a month)	Moderate positive effect		Moderate negative impact
4903210985									IUCN SSC member					Slovenia	Male	Sometimes (once a month)		Easy		Very important		It is not one particular journal but access to Geneva bat library	I prefer reading on a screen	I prefer the original hard copy		No	Never or not available	Never or not available	Never or not available	Never or not available	Very frequently (daily)	Never or not available	Sometimes (once a month)	Very frequently (daily)	Sometimes (once a month)	Moderate positive effect		Slight negative impact
4903209044									IUCN SSC member					United States of America	Male	FrequentlyÂ (once a week)		Not at all easy	Lack access to a library, as the institution I work for recently decided that a library was not important because they decided that everything necessary for any job was online and that people no longer read books or journals. Have access to BioOne and JStor, but some journals are not available through these services, and the agency is thinking about dropping the services because of cost considera…	Essential		Zootaxa	I prefer printingÂ out to read	I prefer printingÂ out to read		Yes	Never or not available	Never or not available	FrequentlyÂ (once a week)	Never or not available	Infrequently	FrequentlyÂ (once a week)	Never or not available	FrequentlyÂ (once a week)
4903208313									IUCN SSC member					Brazil	Male	Very frequently (daily)		Not easy	It is not easy to obtain access to several journals. At the university I can have access to several, but outside its grounds, where my main office lies its not easy at all.	Essential	As the focus of my research and activities are directly related to Red Data List species. Be they ecology, conservation or action planning related activities, I am in constant need to access the literature.	hard to say, Conservation Biology, Biological Conservation, Oryx	I prefer printingÂ out to read	I prefer the original hard copy	These are preferences, but for practicality reading on screen is becoming more and more prevalent, although not preferred.	Yes	Never or not available	Never or not available	Sometimes (once a month)	Never or not available	Infrequently	Never or not available	FrequentlyÂ (once a week)	Very frequently (daily)						Nope
4903207528											IUCN WCPA member			Canada	Male	Never
4903207173									IUCN SSC member					Argentina	Male	Sometimes (once a month)		Easy		Not at all important				I prefer the original hard copy		Yes	Very frequently (daily)	Infrequently	FrequentlyÂ (once a week)	Sometimes (once a month)	Never or not available	Never or not available	Infrequently	Sometimes (once a month)						No
4903206517											IUCN WCPA member				Male	Very frequently (daily)		Not at all easy		Not at all important				I prefer reading on a screen		No	Never or not available	Never or not available	Never or not available	Never or not available	Never or not available	Never or not available	Never or not available	Never or not available
4903204903									IUCN SSC member					Uganda	Male	Sometimes (once a month)		Not easy	Limited internet connectivity	Very important	Deceisions made need to be based on facts from researched and published work	Conservation biology	I prefer reading on a screen			Yes	Infrequently	Never or not available	Infrequently	Never or not available	Never or not available	Never or not available	Infrequently	Sometimes (once a month)						No
4903203308			IUCN International NGO Member											Kenya	Male	Sometimes (once a month)
4903200190			IUCN International NGO Member			IUCN CEC member								Botswana	Male	Infrequently		Not easy		Very important			I prefer reading on a screen			No	Sometimes (once a month)	Sometimes (once a month)	Sometimes (once a month)	Sometimes (once a month)	Sometimes (once a month)	Sometimes (once a month)	Sometimes (once a month)	Very frequently (daily)	Frequently (once a week)	Great positive effect		Moderate negative impact
4903199822									IUCN SSC member					Bosnia and Herzegovina	Male	Infrequently		Not easy		Somewhat important		Mammal Review	I prefer the original hard copy			No	Never or not available	Never or not available	Never or not available	Never or not available	Never or not available	Never or not available	FrequentlyÂ (once a week)	Never or not available	Infrequently	Moderate positive effect		Moderate negative impact		-
4903188143									IUCN SSC member		IUCN WCPA member			Guatemala	Male	FrequentlyÂ (once a week)		Not easy	Limited access to papers and journals	Very important			I prefer reading on a screen	I prefer reading on a screen		Yes	Never or not available	Infrequently	Infrequently	Infrequently	Never or not available	Never or not available	FrequentlyÂ (once a week)	Very frequently (daily)
4903183681												IUCN Secretariat staff		Switzerland	Male	Sometimes (once a month)		Not easy	costs	Essential						No	Sometimes (once a month)	Never or not available	Never or not available	Sometimes (once a month)	Sometimes (once a month)	Never or not available	Sometimes (once a month)	FrequentlyÂ (once a week)	Frequently (once a week)	Great positive effect		Great negative impact
4903177347									IUCN SSC member					United Kingdom of Great Britain and Northern Ireland	Male	FrequentlyÂ (once a week)		Easy	Access to on-line journals through a university.	Essential			I prefer printingÂ out to read	I prefer the original hard copy		Yes	Infrequently	Never or not available	FrequentlyÂ (once a week)	Never or not available	Infrequently	Sometimes (once a month)	Infrequently	FrequentlyÂ (once a week)
4903177055									IUCN SSC member					Taiwan, Province of China, China		FrequentlyÂ (once a week)		Not easy	Retired from university, no official affiliations, access to certain literature took much more effort.	Essential		Fish biology	I prefer reading on a screen	I prefer the original hard copy		No	Never or not available	Infrequently	Never or not available	Never or not available	Infrequently	Sometimes (once a month)	Sometimes (once a month)	FrequentlyÂ (once a week)	Frequently (once a week)	Great positive effect		Moderate negative impact
4903175761											IUCN WCPA member			United States of America	Female	FrequentlyÂ (once a week)		Not at all easy	Without a university or academic affiliation, it is very difficult to obtain access to scientific literature, unless it is open source online.	Very important	My work on steering committes and advisory groups requires research and keeping up with current literature to inform documents I prepare for IUCN. Previously, as a small NGO IUCN member, I needed it to draft motions for the WCC.	International Environmental Agreements: Politics, Law and Economics	I prefer printingÂ out to read	I prefer reading on a screen		No	Never or not available	FrequentlyÂ (once a week)	Never or not available	Never or not available	Sometimes (once a month)	Never or not available	Sometimes (once a month)	FrequentlyÂ (once a week)	Frequently (once a week)	Great positive effect		Moderate negative impact		Thank you for doing this! It is very important!
4903174860									IUCN SSC member					Ethiopia	Male	FrequentlyÂ (once a week)		Easy		Very important			I prefer reading on a screen	I prefer reading on a screen		Yes	FrequentlyÂ (once a week)	Sometimes (once a month)	FrequentlyÂ (once a week)	Infrequently	Infrequently	Infrequently	Never or not available	FrequentlyÂ (once a week)
4903174411									IUCN SSC member					Madagascar	Male	Sometimes (once a month)		Not easy		Very important		Elsevier	I prefer printingÂ out to read	I prefer printingÂ out to read		Yes	FrequentlyÂ (once a week)	Sometimes (once a month)	Sometimes (once a month)	Infrequently	Never or not available	Never or not available	Infrequently	Sometimes (once a month)						None
4903170421									IUCN SSC member					United States of America	Male	FrequentlyÂ (once a week)		Not at all easy	Have to use google Scholar for many papers and then have to beg or get info from a researcher that has access to articles that are not posted on Google Scholar because the Nashville Zoo does not have accounts with other online sources	Very important			I prefer reading on a screen			No	Never or not available	Never or not available	Infrequently	Infrequently	Sometimes (once a month)	Sometimes (once a month)	Sometimes (once a month)	Very frequently (daily)	Frequently (once a week)	Great positive effect	It would save time hving to write the author of a paper to ask for it or get it from another source.	Moderate negative impact	With some time and effort I am able to aquire the articles I need. The problem is that it takes time that could be utilized better.
4903168537											IUCN WCPA member			Brazil	Female	Sometimes (once a month)		Not easy	Can only obttain the one that are from open sources.	Somewhat important		Conservation Biology	I prefer reading on a screen	I prefer the original hard copy		No	Never or not available	Never or not available	Never or not available	Infrequently	Never or not available	Never or not available	Sometimes (once a month)	FrequentlyÂ (once a week)	Frequently (once a week)	Great positive effect		Moderate negative impact
4903166938												IUCN Secretariat staff		Pakistan	Male	Sometimes (once a month)		Not easy		Somewhat important			I prefer reading on a screen			No	Infrequently	Sometimes (once a month)	Sometimes (once a month)	Infrequently	Never or not available	Never or not available	Infrequently	Sometimes (once a month)	Never	Slight positive effect		Slight negative impact
4903163730									IUCN SSC member				Mangrove Specialist group (MSG)	Pakistan	Male	Sometimes (once a month)
4903161161								IUCN CEM member						Nepal	Male	Infrequently		Not easy		Somewhat important		JSTOR	I prefer printingÂ out to read			Yes	Infrequently	Never or not available	FrequentlyÂ (once a week)	Never or not available	Never or not available	Never or not available	Sometimes (once a month)	Never or not available						Scientific literature should be made easily available to countries like Nepal where there are limited resources available.
4903157691							IUCN CEESP member							Algeria	Female	Very frequently (daily)
4903156669			IUCN International NGO Member						IUCN SSC member					United Kingdom of Great Britain and Northern Ireland	Male	FrequentlyÂ (once a week)		Very easy		Essential			I prefer printingÂ out to read	I prefer printingÂ out to read		Yes	Sometimes (once a month)	Never or not available	Very frequently (daily)	Never or not available	Infrequently	Sometimes (once a month)	Infrequently	Very frequently (daily)
4903153965									IUCN SSC member					India	Male	FrequentlyÂ (once a week)
4903151999				IUCN National NGO Member		IUCN CEC member	IUCN CEESP member	IUCN CEM member	IUCN SSC member		IUCN WCPA member			New Zealand	Female	Infrequently		Not at all easy	I want photos...at the moment I need to pay for these and find them through a book designer	Somewhat important		photo library	I prefer reading on a screen			No	Infrequently	Infrequently	Never or not available	Never or not available	Never or not available	Never or not available	Sometimes (once a month)	FrequentlyÂ (once a week)	Infrequently	Moderate positive effect		Great negative impact	Looking for photos from the photo library....impossible to find how to do this...very frustrating...whom do I ask? All those wonderful IUCN photos all sitting somewhere and why cannot we access them?	Who do you ask?
4903151520				IUCN National NGO Member										Bangladesh	Female	Sometimes (once a month)		Easy		Essential		An article related to Marine life, and climate resilience	I prefer reading on a screen	I prefer the original hard copy		Yes	FrequentlyÂ (once a week)	Never or not available	Very frequently (daily)	Never or not available	Infrequently	FrequentlyÂ (once a week)	Sometimes (once a month)	Very frequently (daily)						1.Availability to get information, 2.How could we share our scientific article and journal/ newsletter ?
4903150393									IUCN SSC member			IUCN Secretariat staff		Belgium	Female	FrequentlyÂ (once a week)		Easy	It is easy through the Library services, otherwise it would be impossible to access.	Essential		Biodiversity Consrevation	I prefer reading on a screen	I prefer the original hard copy		No	Never or not available	Never or not available	Never or not available	FrequentlyÂ (once a week)	Infrequently	Never or not available	Infrequently	FrequentlyÂ (once a week)	Frequently (once a week)	Great positive effect		Great negative impact
4903150385									IUCN SSC member					Italy	Male	FrequentlyÂ (once a week)		Easy		Essential		zootaxa	I prefer the original hard copy	I prefer the original hard copy		Yes	Sometimes (once a month)	Infrequently	FrequentlyÂ (once a week)	Infrequently	Very frequently (daily)	FrequentlyÂ (once a week)	FrequentlyÂ (once a week)	Sometimes (once a month)
4903148724													IUCN - Spider and Scorpion Specialist Group	Germany	Male	FrequentlyÂ (once a week)		Not easy		Very important		Conservation Biology (and others ...)	I prefer reading on a screen	I prefer the original hard copy		No	Sometimes (once a month)	Infrequently	Very frequently (daily)	Never or not available	Sometimes (once a month)	Sometimes (once a month)	Sometimes (once a month)	Very frequently (daily)	Very frequently (daily)	Great positive effect		Moderate negative impact
4903146995										IUCN WCEL member				Australia	Male	Infrequently		Easy	As I work as an academic I have substantial access to literature	Very important		There is no specific journal.	I prefer reading on a screen	I prefer reading on a screen		Yes	FrequentlyÂ (once a week)	Infrequently	FrequentlyÂ (once a week)	Never or not available	Infrequently	Infrequently	Never or not available	Sometimes (once a month)
4903145075						IUCN CEC member								Pakistan	Male	FrequentlyÂ (once a week)		Easy	Google search	Very important	Reliability factors are higher for data provided by iucn.	scientific American	I prefer printingÂ out to read	I prefer printingÂ out to read		Yes	Infrequently	FrequentlyÂ (once a week)	Sometimes (once a month)	Infrequently	Never or not available	Never or not available	Infrequently	FrequentlyÂ (once a week)
4903144942			IUCN International NGO Member											United States of America	Female	FrequentlyÂ (once a week)		Very easy	Online access to my institution's library.	Essential		Conservation Biology	I prefer reading on a screen	I prefer the original hard copy		Yes	Infrequently	Never or not available	FrequentlyÂ (once a week)	Never or not available	Infrequently	Sometimes (once a month)	Never or not available	FrequentlyÂ (once a week)
4903144599						IUCN CEC member						IUCN Secretariat staff		Jordan	Female	Never
4903142776		IUCN Government Agency Member			IUCN Affiliate Member				IUCN SSC member					United Kingdom of Great Britain and Northern Ireland	Male	Very frequently (daily)
4903142039										IUCN WCEL member				Greece	Female	Infrequently		Not easy		Somewhat important		Journal of marine and coastal law	I prefer printingÂ out to read	I prefer the original hard copy		No	Never or not available	Infrequently	Sometimes (once a month)	Sometimes (once a month)	Sometimes (once a month)	Infrequently	Sometimes (once a month)	Very frequently (daily)	Very frequently (daily)	Great positive effect		Great negative impact		No
4903141511									IUCN SSC member					Italy	Male	FrequentlyÂ (once a week)		Easy		Very important			I prefer the original hard copy	I prefer the original hard copy		No	Very frequently (daily)	Infrequently	Infrequently	Never or not available	Sometimes (once a month)	Very frequently (daily)	Sometimes (once a month)	Sometimes (once a month)	Never	Moderate positive effect		Slight negative impact		Nothing
4903140326							IUCN CEESP member							Germany	Male	FrequentlyÂ (once a week)
4903138175									IUCN SSC member					Switzerland	Male	FrequentlyÂ (once a week)		Not easy	I can only afford to subscribe to a handful of journals. Some additional,papers can be downloaded from Google Scholar and other sites but it still means I don't get easy access to many papers I need.	Essential	The work i do for SSC is science-based so i need access to science!	Can't choose one...	I prefer reading on a screen	I prefer reading on a screen		No	Never or not available	Never or not available	Never or not available	Never or not available	FrequentlyÂ (once a week)	FrequentlyÂ (once a week)	FrequentlyÂ (once a week)	FrequentlyÂ (once a week)	Frequently (once a week)	Great positive effect		Moderate negative impact	It's more a question of time - it takes ages to write to authors and track down papers i can't access directly.	IUCN help in accessing jounral articles would be much appreciated.
4903134518									IUCN SSC member					Australia	Male	Very frequently (daily)		Very easy		Essential			I prefer printingÂ out to read	I prefer the original hard copy		Yes	Infrequently	Never or not available	Very frequently (daily)	Never or not available	Never or not available	Never or not available	Never or not available	FrequentlyÂ (once a week)
4903131752									IUCN SSC member					India	Male	Sometimes (once a month)		Not easy		Very important			I prefer reading on a screen	I prefer printingÂ out to read		No	Never or not available	Sometimes (once a month)	Infrequently	Never or not available	Never or not available	Infrequently	Sometimes (once a month)	FrequentlyÂ (once a week)	Frequently (once a week)	Moderate positive effect		Great negative impact
4903131663									IUCN SSC member					United States of America	Male	Infrequently		Not easy	I have subscription to few scientific journals.	Somewhat important		CATNEWS	I prefer reading on a screen	I prefer reading on a screen		No	Infrequently	Infrequently	Infrequently	Never or not available	Infrequently	Infrequently	Infrequently	Sometimes (once a month)	Infrequently	Slight positive effect		Slight negative impact		NA
4903127833									IUCN SSC member					United States of America	Male	Sometimes (once a month)		Easy		Essential			I prefer reading on a screen	I prefer the original hard copy		Yes	Sometimes (once a month)	Sometimes (once a month)	FrequentlyÂ (once a week)	Never or not available	Sometimes (once a month)	Infrequently	Infrequently	FrequentlyÂ (once a week)
4903127734									IUCN SSC member				Ex-IUCN Secretariat staff	Switzerland	Female	Sometimes (once a month)		Not easy		Very important		Conservation Biology			No real preference, mostly read on screen but nice to be able to print or save as PDF if possible.	No	Never or not available	Never or not available	Never or not available	Never or not available	Sometimes (once a month)	Infrequently	Sometimes (once a month)	Sometimes (once a month)	Sometimes (once a month)	Moderate positive effect		Slight negative impact
4903126105									IUCN SSC member					Portugal	Male	Sometimes (once a month)		Not easy		Somewhat important		IUCN HQ Library	I prefer reading on a screen	I prefer reading on a screen		Yes	Infrequently	Never or not available	FrequentlyÂ (once a week)	Never or not available	Sometimes (once a month)	Never or not available	Infrequently	FrequentlyÂ (once a week)						No
4903124617											IUCN WCPA member			Canada	Male	Sometimes (once a month)		Not easy		Essential		Not sure	I prefer printingÂ out to read	I prefer the original hard copy		No	Never or not available	Never or not available	Never or not available	Never or not available	Never or not available	Never or not available	Never or not available	Infrequently	Frequently (once a week)	Great positive effect		Moderate negative impact
4903121159											IUCN WCPA member			Australia	Male	Sometimes (once a month)		Easy	I am at a university with good access to scientific liteature - both on-line and hard copies	Very important			I prefer printingÂ out to read	I prefer the original hard copy		Yes	Sometimes (once a month)	Never or not available	FrequentlyÂ (once a week)	Never or not available	Infrequently	Never or not available	Infrequently	Infrequently
4903119883												IUCN Secretariat staff		Switzerland	Female	FrequentlyÂ (once a week)		Not at all easy		Very important		Hard to name just one!	I prefer reading on a screen	I prefer reading on a screen		No	Never or not available	Never or not available	Never or not available	Never or not available	Never or not available	Never or not available	Infrequently	FrequentlyÂ (once a week)	Frequently (once a week)	Great positive effect		Slight negative impact
4903118460									IUCN SSC member					Sweden	Male	FrequentlyÂ (once a week)		Easy	The government Agency in which I work has access to ScienceDirect (Elsevier), Wiley, and Springer. Some journals that are not open access and issued by other publisers may be more difficult, slow or expensive to receive papers from.	Essential	It's absolutely vital, for example, to keep up-to-date on scientific findings, reviews and assessments.	Ecological Applications	I prefer printingÂ out to read	I prefer the original hard copy	"policy briefs" published on the web may also provide very useful briefings of scientific findings.	Yes	FrequentlyÂ (once a week)	Sometimes (once a month)	FrequentlyÂ (once a week)	Never or not available	Sometimes (once a month)	Never or not available	Infrequently	Very frequently (daily)
4903116930									IUCN SSC member					Australia	Male	FrequentlyÂ (once a week)		Easy	I have an honorary appointment with a university giving me access to their resources, often I can find the paper that I need, but getting a copy is challenging and usually requires that the authors will send me a copy / PDF. Usually this works, but there are times when authors do not respond or email addresses have changed.	Very important	We need to remain up-to-date on developments in the field that we work in, particularly as this involves an in-depth knowledge of the literature including specifically for literature reviews.	To many to name! Anything behind a paywall that covers SPP specialist group areas.	I prefer reading on a screen	I prefer reading on a screen		Yes	Sometimes (once a month)	Infrequently	Sometimes (once a month)	Never or not available	FrequentlyÂ (once a week)	Never or not available	Never or not available	FrequentlyÂ (once a week)
4903114601									IUCN SSC member					India	Male	FrequentlyÂ (once a week)		Easy		Very important			I prefer printingÂ out to read	I prefer the original hard copy		Yes	FrequentlyÂ (once a week)	Sometimes (once a month)	FrequentlyÂ (once a week)	Never or not available	Sometimes (once a month)	Infrequently	Infrequently	Infrequently
4903109641									IUCN SSC member					Brazil	Male	Very frequently (daily)		Very easy		Essential		Conservation Biology	I prefer reading on a screen	I prefer the original hard copy		Yes	Infrequently	Never or not available	Very frequently (daily)	Never or not available	Sometimes (once a month)	Very frequently (daily)	Never or not available	Very frequently (daily)
4903108886									IUCN SSC member					United Kingdom of Great Britain and Northern Ireland	Male	Very frequently (daily)		Very easy	I am a professor at a university and have access to library material online and in hard copy	Essential		Really, there isn't a single journal that covers everything	I prefer printingÂ out to read	I prefer printingÂ out to read		Yes	Very frequently (daily)	Infrequently	Very frequently (daily)	Never or not available	Infrequently	Sometimes (once a month)	Sometimes (once a month)	Sometimes (once a month)						No
4903103586									IUCN SSC member					United Kingdom of Great Britain and Northern Ireland	Male	Very frequently (daily)		Very easy	Currently have access through university association via Shibboleth	Essential	Species assessment for Red List		I prefer reading on a screen	I prefer reading on a screen		Yes	Infrequently	Never or not available	Very frequently (daily)	Never or not available	Sometimes (once a month)	Never or not available	Infrequently	Very frequently (daily)
4903095118									IUCN SSC member					United Kingdom of Great Britain and Northern Ireland	Male	FrequentlyÂ (once a week)		Very easy	I have access to scientific journals through my affiliation to University College London	Essential		No one journal over any other	I prefer reading on a screen			Yes	Sometimes (once a month)	Never or not available	Very frequently (daily)	Never or not available	Sometimes (once a month)	Sometimes (once a month)	Infrequently	FrequentlyÂ (once a week)
4903094624									IUCN SSC member					Namibia	Male	Very frequently (daily)		Not easy	Limited access to journals - cost implications	Essential	Providing technical advice and support using available literature references is critical for maintaining a standard and professional approach	Nature	I prefer reading on a screen	I prefer the original hard copy		No	Very frequently (daily)	Sometimes (once a month)	Sometimes (once a month)	Never or not available	FrequentlyÂ (once a week)	Sometimes (once a month)	FrequentlyÂ (once a week)	Very frequently (daily)	Very frequently (daily)	Great positive effect		Great negative impact
4903094081										IUCN WCEL member				Germany	Male	Very frequently (daily)		Easy	I have access to an excellent university library. Even where literatur should be unavailable in Bonn, it can be ordered.	Essential			I prefer the original hard copy	I prefer the original hard copy		Yes	Very frequently (daily)	Infrequently	Very frequently (daily)	Never or not available	Infrequently	Infrequently	Infrequently	Very frequently (daily)
4903094010											IUCN WCPA member			Nigeria	Female	Very frequently (daily)		Easy		Somewhat important			I prefer the original hard copy	I prefer the original hard copy		No	Infrequently	Never or not available	Never or not available	Infrequently	Sometimes (once a month)	Infrequently	Very frequently (daily)	Very frequently (daily)	Very frequently (daily)	Great positive effect		Great negative impact		No
4903091558											IUCN WCPA member			Slovakia	Male	Sometimes (once a month)		Easy		Somewhat important			I prefer reading on a screen	I prefer the original hard copy		Yes	Infrequently	Never or not available	Sometimes (once a month)	Never or not available	Infrequently	Never or not available	Never or not available	FrequentlyÂ (once a week)
4903090831				IUCN National NGO Member										The former Yugoslav Republic of Macedonia	Male	Sometimes (once a month)		Not easy	Scientific articles are often found behind paywalls we, as an organization, can not afford.	Essential	State of the art scientific studies are ever changing, and are crucial for species distribution/density analysis.	plos one	I prefer printingÂ out to read	I prefer printingÂ out to read		No	Infrequently	Never or not available	Never or not available	Never or not available	Sometimes (once a month)	Never or not available	Infrequently	Sometimes (once a month)	Sometimes (once a month)	Great positive effect	Time spent for finding pay-walled articles will be reduced greatly, which will have a significant impact by itself. Additionally, paper abstracts are not always a guarantee that the whole paper will be very useful for the purpose. Being able to go to the next paper without the time buffers needed for acquiring it, is a game changer.	Moderate negative impact
4903088851													Honorary member	Denmark	Male	Never
4903087676									IUCN SSC member					Hong Kong, China	Male	FrequentlyÂ (once a week)		Not easy		Essential		That depends.	I prefer reading on a screen	I prefer reading on a screen		No	Very frequently (daily)	Sometimes (once a month)	FrequentlyÂ (once a week)	Never or not available	FrequentlyÂ (once a week)	Never or not available	Very frequently (daily)	Very frequently (daily)	Frequently (once a week)	Great positive effect		Moderate negative impact
4903085043				IUCN National NGO Member										Greece	Male	FrequentlyÂ (once a week)		Not easy	Due to recent cuts in subscriptions to academic journals	Very important		Conservation Biology	I prefer reading on a screen	I prefer reading on a screen		Yes	Very frequently (daily)	Never or not available	FrequentlyÂ (once a week)	Never or not available	FrequentlyÂ (once a week)	Never or not available	Infrequently	FrequentlyÂ (once a week)						no
4903083006				IUCN National NGO Member					IUCN SSC member					Albania	Male	FrequentlyÂ (once a week)		Easy		Very important		Wildlife Diseases Journal	I prefer the original hard copy			No	Sometimes (once a month)	FrequentlyÂ (once a week)	Sometimes (once a month)	FrequentlyÂ (once a week)	FrequentlyÂ (once a week)	FrequentlyÂ (once a week)	FrequentlyÂ (once a week)	FrequentlyÂ (once a week)	Frequently (once a week)	Moderate positive effect		Slight negative impact		no
4903081182								IUCN CEM member						Botswana	Male	Very frequently (daily)
4903080819									IUCN SSC member					Croatia	Male	Very frequently (daily)		Not easy		Essential		Conservation Biology	I prefer printingÂ out to read	I prefer printingÂ out to read		Yes	FrequentlyÂ (once a week)	Sometimes (once a month)	FrequentlyÂ (once a week)	Never or not available	FrequentlyÂ (once a week)	Infrequently	Sometimes (once a month)	FrequentlyÂ (once a week)
4903079838											IUCN WCPA member			Croatia	Female	Sometimes (once a month)		Not easy		Very important			I prefer printingÂ out to read	I prefer the original hard copy		No	Sometimes (once a month)	Infrequently	Never or not available	Never or not available	Never or not available	Never or not available	FrequentlyÂ (once a week)	FrequentlyÂ (once a week)	Frequently (once a week)	Moderate positive effect		Slight negative impact
4903079573									IUCN SSC member					Germany	Male	FrequentlyÂ (once a week)		Easy		Very important		no specific journal	I prefer printingÂ out to read	I prefer the original hard copy		Yes	Very frequently (daily)	Infrequently	Very frequently (daily)	Never or not available	FrequentlyÂ (once a week)	Infrequently	Infrequently	Very frequently (daily)
4903076533							IUCN CEESP member		IUCN SSC member					United Kingdom of Great Britain and Northern Ireland	Male	FrequentlyÂ (once a week)		Not easy	I do not have access to free journals as far as I am aware so rely on methods such as Google Scholar, ResearchGate and contacting authors.	Essential		There is no one journal as my work is interdisciplinary.	I prefer reading on a screen	I prefer the original hard copy		No	Never or not available	Infrequently	Never or not available	Never or not available	Sometimes (once a month)	Sometimes (once a month)	Sometimes (once a month)	Very frequently (daily)	Very frequently (daily)	Great positive effect	Not necessarily institutional but personal access would be very useful. This would allow me to stay up to date and follow up on articles much more efficiently. It would also be worth raising awareness of what the IUCN library can provide and how this works.	Great negative impact	Again, individual rather than institutional but I spend a lot of time finding out about what has been published and trying to gain access to the full text.
4903076005									IUCN SSC member					Australia	Female	FrequentlyÂ (once a week)		Easy	i use google scholar and research gate	Essential			I prefer reading on a screen	I prefer reading on a screen	i frequently use the "find" tool for specific words/species. this is only done using a digital copy	No	Never or not available	Never or not available	Sometimes (once a month)	Never or not available	Infrequently	Never or not available	Never or not available	Very frequently (daily)	Frequently (once a week)	Slight positive effect		Slight negative impact	at this stage, open access papers and research gate seem to have most of the research i need. institutional access would only be of sight benefit on a daily basis, however of very large benefit with more unusual journals and older papers.	institutional access is all very well, but if they don't pay to have a wide variety of journals (from multiple publishing companies), its next to useless. further, many institutions (mostly government in my experience) buy the basic 'entry level' elsevier (or other large publishing company) journal package which often only provides abstracts and does not give 100% access to pdf copies of papers.
4903075065							IUCN CEESP member			IUCN WCEL member				India	Female	Very frequently (daily)		Not easy	Not all the data is available. Papers published in the journal are not assessBle.. Only name of the author and topic are known.	Essential	I am Phd scholar doung research on forest conservation and management law	Journals related to forests ,biodiversity climate change erc	I prefer reading on a screen	I prefer the original hard copy		No	Infrequently	Infrequently	Infrequently	Infrequently	Infrequently	Infrequently	Sometimes (once a month)	FrequentlyÂ (once a week)	Very frequently (daily)	Great positive effect	Easy to do research and not to repeat already done work	Slight negative impact		I want an easy access to this knowledge bank.
4903073887													specialist group member	French Polynesia, France	Male	Never
4903070818				IUCN National NGO Member										Bangladesh	Female	Sometimes (once a month)		Not easy		Somewhat important			I prefer reading on a screen	I prefer reading on a screen		No	Never or not available	Infrequently	Never or not available	Never or not available	Infrequently	Infrequently	Infrequently	Infrequently	Sometimes (once a month)	Slight positive effect		Slight negative impact
4903069446										IUCN WCEL member				Russian Federation	Male	Infrequently		Easy		Very important		Journal of human rights and the environment	I prefer printingÂ out to read	I prefer the original hard copy		Yes	FrequentlyÂ (once a week)	Infrequently	FrequentlyÂ (once a week)	Never or not available	Infrequently	Never or not available	Infrequently	FrequentlyÂ (once a week)
4903068302								IUCN CEM member						Australia	Male	Infrequently
4903066279									IUCN SSC member					United Kingdom of Great Britain and Northern Ireland	Male	Infrequently
4903065554						IUCN CEC member							Long-term consultant to IUCN	Sri Lanka	Female	Very frequently (daily)		Not easy	It costs a lot even to pay for pay-per-read articles. Not all I need is available at the IUCN library in Colombo and there is rarely time to get it from HQ	Essential	My work with IUCN invariably involves editing or compiling technical reports. In order to do this, I have to be able to buttress weak areas in reports and often, have to read outside my expertise in order to provide this strengthening.	Conservation Biology	I prefer reading on a screen	I prefer reading on a screen	For books I prefer both online and the hard copy.	No	FrequentlyÂ (once a week)	Never or not available	Never or not available	FrequentlyÂ (once a week)	FrequentlyÂ (once a week)	Infrequently	FrequentlyÂ (once a week)	FrequentlyÂ (once a week)	Very frequently (daily)	Great positive effect	I spend a lot of time looking for free copies of articles to download. If I could have immediate access it would speed up things, particularly when there are very tight deadlines.	Great negative impact		This is a really important survey.
4903064123			IUCN International NGO Member	IUCN National NGO Member										Norway	Male	Infrequently		Not easy		Somewhat important		J Wildlife Manage	I prefer printingÂ out to read	I prefer the original hard copy		Yes	Sometimes (once a month)	Infrequently	Very frequently (daily)	Never or not available	Infrequently	Sometimes (once a month)	Infrequently	FrequentlyÂ (once a week)
4903063318									IUCN SSC member					Kenya	Male	FrequentlyÂ (once a week)		Not at all easy	The server is normally slow.	Very important	It is critical to receive the latest literature in the field	Marine policy	I prefer reading on a screen	I prefer the original hard copy		Yes	FrequentlyÂ (once a week)	Infrequently	FrequentlyÂ (once a week)	Infrequently	Sometimes (once a month)	Never or not available	Very frequently (daily)	Very frequently (daily)						Nil
4903062586						IUCN CEC member								Malaysia	Male	Sometimes (once a month)		Not easy		Somewhat important		IUCN Traffic Reports and Journals	I prefer the original hard copy	I prefer the original hard copy	Traditional media is useful although electronic copies may be good for storage and quick references.	No	Infrequently	Never or not available	Infrequently	Never or not available	Sometimes (once a month)	Infrequently	Infrequently	Sometimes (once a month)	Frequently (once a week)	Moderate positive effect	Better up to date references and citations	Slight negative impact		No, thank you.
4903062445				IUCN National NGO Member					IUCN SSC member		IUCN WCPA member			Iraq	Male	FrequentlyÂ (once a week)		Easy		Very important		Avian Biology	I prefer reading on a screen	I prefer the original hard copy		No	FrequentlyÂ (once a week)	Infrequently	Never or not available	Never or not available	Infrequently	Infrequently	FrequentlyÂ (once a week)	FrequentlyÂ (once a week)	Frequently (once a week)	Moderate positive effect		Great negative impact		No
4903061825			IUCN International NGO Member											Russian Federation	Male	Infrequently		Easy		Somewhat important			I prefer reading on a screen			No	Sometimes (once a month)	FrequentlyÂ (once a week)	Never or not available	Infrequently	Never or not available	FrequentlyÂ (once a week)	Infrequently	FrequentlyÂ (once a week)	Sometimes (once a month)	Moderate positive effect		No impact at all
4903061198				IUCN National NGO Member	IUCN Affiliate Member				IUCN SSC member		IUCN WCPA member			Jordan	Male	Sometimes (once a month)		Easy		Very important			I prefer the original hard copy	I prefer the original hard copy		No	Never or not available	FrequentlyÂ (once a week)	Never or not available	Infrequently	Sometimes (once a month)	Sometimes (once a month)	Sometimes (once a month)	Very frequently (daily)	Frequently (once a week)	Great positive effect		Moderate negative impact
4903059543									IUCN SSC member					Ukraine	Male	FrequentlyÂ (once a week)		Not easy	No access to journals, no subscription from my institution	Essential		Hard to name one	I prefer reading on a screen	I prefer the original hard copy		No	Never or not available	Never or not available	Infrequently	Infrequently	FrequentlyÂ (once a week)	Infrequently	Sometimes (once a month)	FrequentlyÂ (once a week)	Frequently (once a week)	Great positive effect		Moderate negative impact
4903059531											IUCN WCPA member			United Kingdom of Great Britain and Northern Ireland	Female	Sometimes (once a month)		Not easy		Somewhat important		Marine Ecology Progress Series	I prefer reading on a screen	I prefer the original hard copy		No	Never or not available	Infrequently	Never or not available	Never or not available	Infrequently	Infrequently	Sometimes (once a month)	Sometimes (once a month)	Frequently (once a week)	Great positive effect		Slight negative impact
4903058921									IUCN SSC member					Madagascar	Male	Sometimes (once a month)		Not easy		Very important						No	Infrequently	Never or not available	Never or not available	Never or not available	Sometimes (once a month)	Never or not available	FrequentlyÂ (once a week)	Very frequently (daily)	Frequently (once a week)	Slight positive effect		Moderate negative impact
4903057515								IUCN CEM member						The Netherlands	Male	Sometimes (once a month)		Easy		Somewhat important			I prefer reading on a screen	I prefer the original hard copy		Yes	Sometimes (once a month)	Sometimes (once a month)	Sometimes (once a month)	Infrequently	FrequentlyÂ (once a week)	FrequentlyÂ (once a week)	Sometimes (once a month)	Sometimes (once a month)
4903057272								IUCN CEM member						Algeria	Male	Very frequently (daily)		Easy		Essential		sciences directe	I prefer the original hard copy	I prefer the original hard copy		Yes	Infrequently	Infrequently	Infrequently	Infrequently	Infrequently	Infrequently	Infrequently	Infrequently
4903056490											IUCN WCPA member			Brazil	Female	FrequentlyÂ (once a week)		Easy	I am a university teacher and do have access a some database	Essential		any intentional journal related do protected areas, EBM, etc.	I prefer reading on a screen	I prefer the original hard copy		Yes	Sometimes (once a month)	Infrequently	Very frequently (daily)	Never or not available	Infrequently	Never or not available	Sometimes (once a month)	FrequentlyÂ (once a week)
4903056349									IUCN SSC member				IUCN Red List partner organisation	United Kingdom of Great Britain and Northern Ireland	Female	FrequentlyÂ (once a week)		Easy	Online journal access through our affiliation with higher education and for more troublesome publications, we can consult the British Library.	Essential	Forms the basis of any of our assessments.	I work across species groups, so there isn't one single one. It is primarily regional/foreign language journals that may be important to get access to.	I prefer reading on a screen	I prefer reading on a screen		Yes	Infrequently	Infrequently	Very frequently (daily)	Never or not available	Infrequently	Never or not available	Sometimes (once a month)	FrequentlyÂ (once a week)						AS I said above, the most important journals to gain access to (because at the moment they are difficult to get hold of) are regional taxon specific journals and foreign language ones.
4903056045			IUCN International NGO Member											The Netherlands	Male	Sometimes (once a month)		Not easy		Somewhat important		nature// ursus	I prefer reading on a screen	I prefer the original hard copy		No	Infrequently	Sometimes (once a month)	Infrequently	Infrequently	Infrequently	Infrequently	Infrequently	Infrequently	Infrequently	Slight positive effect		Slight negative impact
4903054896										IUCN WCEL member				Iran (Islamic Republic of)	Male	Infrequently		Not easy		Very important			I prefer reading on a screen			Yes	FrequentlyÂ (once a week)	FrequentlyÂ (once a week)	FrequentlyÂ (once a week)	Never or not available	Never or not available	Never or not available	FrequentlyÂ (once a week)	FrequentlyÂ (once a week)
4903052817									IUCN SSC member					Australia	Male	Infrequently
4903051191							IUCN CEESP member						biofuel task memeber	India	Male	FrequentlyÂ (once a week)		Not easy		Very important			I prefer printingÂ out to read	I prefer the original hard copy		No	Never or not available	Infrequently	Never or not available	Never or not available	Infrequently	Never or not available	Infrequently	FrequentlyÂ (once a week)	Sometimes (once a month)	Moderate positive effect		No impact at all		no
4903049358						IUCN CEC member								Italy	Male	FrequentlyÂ (once a week)		Not easy		Very important			I prefer reading on a screen	I prefer reading on a screen		No	Never or not available	Sometimes (once a month)	Never or not available	Sometimes (once a month)	Sometimes (once a month)	Never or not available	Sometimes (once a month)	FrequentlyÂ (once a week)		Slight positive effect		Slight negative impact
4903049262									IUCN SSC member					Greece	Male	FrequentlyÂ (once a week)		Easy		Very important		Bird Conservation International	I prefer printingÂ out to read	I prefer the original hard copy		Yes	Sometimes (once a month)	Never or not available	FrequentlyÂ (once a week)	Never or not available	Infrequently	Sometimes (once a month)	Infrequently	FrequentlyÂ (once a week)
4903047957											IUCN WCPA member			Pakistan	Male	Infrequently		Very easy		Very important		Biodiversity conservation and Protected Areas Management	I prefer reading on a screen	I prefer reading on a screen		No	Never or not available	Never or not available	Never or not available	Never or not available	Never or not available	Never or not available	Infrequently	Infrequently	Very frequently (daily)	Great positive effect		Great negative impact
4903047363									IUCN SSC member					Slovenia	Male	Infrequently		Easy		Very important		difficult to decide	I prefer printingÂ out to read	I prefer the original hard copy		No	Infrequently	Never or not available	Infrequently	Never or not available	FrequentlyÂ (once a week)	Never or not available	Infrequently	Sometimes (once a month)	Sometimes (once a month)	Moderate positive effect		Slight negative impact		no
4903046797				IUCN National NGO Member										The Netherlands	Male	Sometimes (once a month)		Very easy		Very important		Conservation Biolofy	I prefer the original hard copy	I prefer the original hard copy		Yes	FrequentlyÂ (once a week)	Infrequently	FrequentlyÂ (once a week)	Never or not available	Infrequently	FrequentlyÂ (once a week)	FrequentlyÂ (once a week)	FrequentlyÂ (once a week)
4903044941								IUCN CEM member			IUCN WCPA member			China	Male	Infrequently		Not easy		Somewhat important			I prefer printingÂ out to read	I prefer reading on a screen		No	Never or not available	Never or not available	Infrequently	Infrequently	Never or not available	Never or not available	Never or not available	Sometimes (once a month)	Infrequently	No effect at allÂ		No impact at all	I am not very active, as my current job does not allow much time for extra-curricular activities	I am fully employed as DG of an international organization, so my time as IUCN Commission Member is limited. I therefore use literature very infrequently for IUCN work. This will change in a few years time, when I lee my current post.
4903044253									IUCN SSC member					United Arab Emirates	Female	FrequentlyÂ (once a week)		Not easy		Very important			I prefer the original hard copy	I prefer the original hard copy		Yes	FrequentlyÂ (once a week)	Never or not available	Very frequently (daily)	Never or not available	Infrequently	Sometimes (once a month)	Sometimes (once a month)	FrequentlyÂ (once a week)
4903043985													Project Staff	Cambodia	Male	Sometimes (once a month)
4903043556		IUCN Government Agency Member					IUCN CEESP member							Viet Nam	Male	Sometimes (once a month)		Easy		Very important		Máº£ngove, conservation	I prefer reading on a screen	I prefer printingÂ out to read		No	Infrequently	Infrequently	Never or not available	Never or not available	Never or not available	Infrequently	Never or not available	Infrequently	Sometimes (once a month)	Moderate positive effect		Slight negative impact
4903042585									IUCN SSC member					United Kingdom of Great Britain and Northern Ireland	Female	FrequentlyÂ (once a week)		Not easy	I live in a rural area with no close Universities. Without affliation to a University or equivalent research organisation each paper accessed online from some publishers could cost $30 or more. You then need to wait until one of the authors replies sending a pdf file. Also no access to scientific databases streamlining searching for literature.	Very important	Access to research databases like Web of Science gives quicker access to relevant papers on topics. Access to the pdf's means the content can be reviewed, used, challenged or queried.	Web of Science (not a journal as such, but content database for many journals)	I prefer reading on a screen	I prefer the original hard copy		No	Never or not available	Never or not available	Never or not available	Never or not available	Sometimes (once a month)	Sometimes (once a month)	Sometimes (once a month)	FrequentlyÂ (once a week)	Frequently (once a week)	Great positive effect	Able to be more responsive when read of relevant paper/report as able to access when the question has arisen, not later when you get access to the literature	Moderate negative impact	Need to spend more time getting access to literature, which could be spent on researching the answers to the question, rather than finding methods to access papers
4903041685									IUCN SSC member					Australia	Male	Very frequently (daily)		Not easy	Dependent on associate status at local university	Essential	Undertaking many Red List species assessments	No single journal	I prefer reading on a screen	I prefer reading on a screen	Availability as downloadable pdf's	Yes	Never or not available	Never or not available	Very frequently (daily)	Never or not available	Sometimes (once a month)	Sometimes (once a month)	Never or not available	Very frequently (daily)						The availability of access to on-line journal subscriptions would be enormously useful
4903041310				IUCN National NGO Member					IUCN SSC member					Israel	Male	Sometimes (once a month)		Very easy	Currently I am staff in a university. But not sure if this will continue in the future	Very important		Bird Conservation International	I prefer reading on a screen	I prefer the original hard copy		Yes	Infrequently	Never or not available	Very frequently (daily)	Never or not available	Sometimes (once a month)	Infrequently	Infrequently	FrequentlyÂ (once a week)
4903041064									IUCN SSC member					South Africa	Male	FrequentlyÂ (once a week)		Very easy		Essential			I prefer reading on a screen	I prefer reading on a screen		Yes	FrequentlyÂ (once a week)	Never or not available	FrequentlyÂ (once a week)	Infrequently	Sometimes (once a month)	Never or not available	Never or not available	Infrequently
4903040436																FrequentlyÂ (once a week)
4903039945								IUCN CEM member						Norway	Female	FrequentlyÂ (once a week)		Easy		Essential		There is no one single journal. But for example we do not have access to Nature.	I prefer printingÂ out to read	I prefer the original hard copy		Yes	Never or not available	Never or not available	FrequentlyÂ (once a week)	Never or not available	Infrequently	Never or not available	Infrequently	Infrequently
4903039628		IUCN Government Agency Member												Slovenia	Male	Infrequently		Easy		Very important		Biology Conservation	I prefer printingÂ out to read	I prefer reading on a screen		No	Never or not available	Infrequently	Never or not available	Never or not available	Never or not available	Infrequently	Infrequently	FrequentlyÂ (once a week)	Sometimes (once a month)	Moderate positive effect		Slight negative impact		One area is scientific information, the other one are IUCN documents (recomm., resolutions). It is very helpful that there is a reliable and easily accessible posibility to access IUCN documents.
4903038819											IUCN WCPA member			Austria	Male	FrequentlyÂ (once a week)		Not easy		Very important			I prefer printingÂ out to read	I prefer the original hard copy		Yes	FrequentlyÂ (once a week)	Infrequently	Sometimes (once a month)	Never or not available	Sometimes (once a month)	Never or not available	Infrequently	Very frequently (daily)
4903037729							IUCN CEESP member							United Kingdom of Great Britain and Northern Ireland	Male	Very frequently (daily)
4903037195									IUCN SSC member					Singapore	Male	Infrequently		Easy		Very important			I prefer reading on a screen	I prefer the original hard copy		Yes	Sometimes (once a month)	Infrequently	Sometimes (once a month)	Never or not available	Infrequently	Never or not available	Never or not available	Sometimes (once a month)
4903037194									IUCN SSC member					Australia	Male	FrequentlyÂ (once a week)		Not easy	I am retired and have no scientific library access. I often need to ask former colleagues or friends to download pdfs.	Essential		Wildlife Research	I prefer reading on a screen	I prefer reading on a screen		No	Never or not available	Infrequently	Never or not available	Never or not available	Sometimes (once a month)	Never or not available	Sometimes (once a month)	FrequentlyÂ (once a week)	Frequently (once a week)	Moderate positive effect		Moderate negative impact
4903036883										IUCN WCEL member	IUCN WCPA member			Austria	Male	Infrequently		Very easy		Essential		Rather content related, no specific one	I prefer reading on a screen	I prefer reading on a screen	More easy access and search for it.	Yes	Sometimes (once a month)	Infrequently	FrequentlyÂ (once a week)	Never or not available	Never or not available	Never or not available	Never or not available	Infrequently						None
4903036570									IUCN SSC member					Japan	Male	Infrequently		Easy		Somewhat important		no idea	I prefer printingÂ out to read	I prefer the original hard copy		Yes	Never or not available	Never or not available	Infrequently	Never or not available	FrequentlyÂ (once a week)	Infrequently	Infrequently	Never or not available						none
4903035932									IUCN SSC member					Germany	Female	Infrequently		Very easy		Very important			I prefer reading on a screen	I prefer reading on a screen	depends. to just look something up, I prefer the screen, to understand a complex matter, I print out and read offline.	Yes	Sometimes (once a month)	Never or not available	Very frequently (daily)	Never or not available	Infrequently	Sometimes (once a month)	Infrequently	FrequentlyÂ (once a week)
4903035549			IUCN International NGO Member						IUCN SSC member					Indonesia	Male	Sometimes (once a month)		Easy	Normally easy as often have direct contact to the authors or colleagues with signups to journal sites. Myself I have few signups directly to journal sites	Very important	We need the latest data on our focal species and region, more general articles are less important	Hard to say as needs are so varied	I prefer printingÂ out to read	I prefer the original hard copy		No	Never or not available	Never or not available	Never or not available	Never or not available	Sometimes (once a month)	Infrequently	Sometimes (once a month)	Sometimes (once a month)	Sometimes (once a month)	Moderate positive effect		Slight negative impact		Myself I use the sceintific literature less than some others in my department, who write more reports and papers themselves. Our needs are also highly varied from species specific items to whole ecosystem and general conservation articles
4903035011											IUCN WCPA member			Russian Federation	Male	Never
4903034879								IUCN CEM member						Indonesia	Male	Sometimes (once a month)		Not easy		Somewhat important		Journal of Applied Ecology	I prefer printingÂ out to read	I prefer the original hard copy		Yes	Never or not available	FrequentlyÂ (once a week)	Sometimes (once a month)	Never or not available	Never or not available	Sometimes (once a month)	Never or not available	FrequentlyÂ (once a week)
4903034792								IUCN CEM member						Russian Federation	Male	Very frequently (daily)		Easy	thanks to internet the access to journal publications and reports became easy, and access to monographs - not so but much more easy than 15-20 years ago and earlier	Very important		it is very hard to name only one journal. Probably: Biological Conservation	I prefer reading on a screen	I prefer the original hard copy	on books: I prefer hard copy to be informed in general but reading on a screen is preferable for working (preparing publications or presentations, analytics, etc)	Yes	Never or not available	Infrequently	FrequentlyÂ (once a week)	Never or not available	Sometimes (once a month)	Very frequently (daily)	FrequentlyÂ (once a week)	Very frequently (daily)						no, sorry
4903031942									IUCN SSC member		IUCN WCPA member			Denmark	Male	Infrequently
4903031786						IUCN CEC member								Finland	Female	Sometimes (once a month)		Not easy	I work within the field of environmental and outdoor education. I have access to some sources, for example the Journal of Adventure Education and Outdoor Learning and the Environmental Education Research, but others, such as the Canadian and the Australian journal at the field are hard to reach, not to mention more local research results, as I my level of French and Spanish is not high enough to …	Essential	Part of my perceived "expertise" is in my research background on which I build my own teaching.	Australian journal of Outdoor Education or Canadian Journal of Outdoor education perhaps.	I prefer printingÂ out to read	I prefer the original hard copy	Books I want to have as books, but as that is expensive to fix, an e-version is also acceptable.	Yes	Infrequently	Infrequently	FrequentlyÂ (once a week)	Never or not available	Infrequently	Never or not available	FrequentlyÂ (once a week)	Very frequently (daily)
4903031462											IUCN WCPA member			Australia	Male	FrequentlyÂ (once a week)		Very easy		Very important		Conservation Biology	I prefer reading on a screen	I prefer the original hard copy		Yes	FrequentlyÂ (once a week)	Infrequently	Very frequently (daily)	Never or not available	Infrequently	Never or not available	Infrequently	FrequentlyÂ (once a week)
4903030398			IUCN International NGO Member						IUCN SSC member					China	Male	FrequentlyÂ (once a week)		Not easy	I work for a small NGO out of my home in China, with my institutional affiliation in USA. The librarian at headquarters will help me get articles, but there are delays. She has online access through a university but I don't.	Somewhat important		cannot name one in particular	I prefer reading on a screen	I prefer reading on a screen		No	Infrequently	Infrequently	Never or not available	Never or not available	Never or not available	Never or not available	Infrequently	Sometimes (once a month)	Frequently (once a week)	Moderate positive effect		Moderate negative impact		Thanks for working on this issue -- important for many of us.
4903029912						IUCN CEC member								Zambia	Male	Very frequently (daily)		Not at all easy	I do not know that this facility exists.	Essential	I am a lecture I need to be updated with latest scientific knowledge.	Climate Change/smart agriculture	I prefer reading on a screen	I prefer the original hard copy	Electonic versions such as CD,USB devices and web sites	No	Never or not available	Never or not available	Infrequently	Never or not available	Never or not available	Infrequently	Infrequently	Very frequently (daily)	Very frequently (daily)	Great positive effect	Enhancement of knowledge for institutions with no access to libraries.	Great negative impact
4903029456									IUCN SSC member					Ireland	Female	FrequentlyÂ (once a week)		Not easy	The National Biodiversity Data Centre does not have subscribed journal access but I can easily obtain open access journals.	Very important	My day to day work is of relevance to my IUCN work so access to scientific literature is very important		I prefer printingÂ out to read	I prefer the original hard copy	While my preference is to read printed materials I would often scan and read from a screen information of relevance. Printing would only occur where reading of about 5 plus pages is required.	No	Never or not available	Never or not available	Never or not available	Never or not available	Infrequently	Never or not available	Sometimes (once a month)	Very frequently (daily)	Very frequently (daily)	Moderate positive effect		Moderate negative impact
4903028575									IUCN SSC member					Denmark	Male	Sometimes (once a month)		Easy		Very important		This question is too simple, you never know what journal you have to look after	I prefer reading on a screen	I prefer reading on a screen		Yes	Infrequently	Infrequently	Sometimes (once a month)	Never or not available	Sometimes (once a month)	Never or not available	Never or not available	FrequentlyÂ (once a week)
4903027811											IUCN WCPA member			Australia	Female	FrequentlyÂ (once a week)		Very easy	Library acces through honorary status at a university.	Very important		Conservation Biology	I prefer printingÂ out to read			Yes	FrequentlyÂ (once a week)	Never or not available	FrequentlyÂ (once a week)	Never or not available	Infrequently	Never or not available	Infrequently	FrequentlyÂ (once a week)
4903027437						IUCN CEC member								Indonesia	Female	Never
4903027310								IUCN CEM member						India	Male	Sometimes (once a month)		Easy		Somewhat important		Journal of Phycology and European Journal of Phycology and some Elesiver Journals	I prefer reading on a screen	I prefer the original hard copy		Yes	FrequentlyÂ (once a week)	Never or not available	Sometimes (once a month)	Never or not available	Infrequently	Infrequently	Never or not available	FrequentlyÂ (once a week)
4903026411											IUCN WCPA member			Portugal	Female	Sometimes (once a month)		Not easy	Most part of scientific papers are payed	Very important			I prefer printingÂ out to read	I prefer reading on a screen		Yes	Infrequently	Infrequently	Infrequently	Never or not available	Infrequently	Never or not available	Never or not available	Very frequently (daily)
4903026111						IUCN CEC member								Pakistan	Male	Sometimes (once a month)		Easy		Very important			I prefer the original hard copy	I prefer the original hard copy		Yes	FrequentlyÂ (once a week)	Infrequently	FrequentlyÂ (once a week)	Never or not available	Sometimes (once a month)	Sometimes (once a month)	Sometimes (once a month)	FrequentlyÂ (once a week)
4903024813											IUCN WCPA member			Thailand	Male	Very frequently (daily)		Easy	I work in the university as professor.	Essential		Nature	I prefer printingÂ out to read	I prefer printingÂ out to read		Yes	Infrequently	Infrequently	Very frequently (daily)	Never or not available	Sometimes (once a month)	Sometimes (once a month)	FrequentlyÂ (once a week)	Very frequently (daily)
4903024313									IUCN SSC member		IUCN WCPA member			New Zealand	Male	FrequentlyÂ (once a week)		Very easy		Very important		Oryx	I prefer printingÂ out to read	I prefer the original hard copy		Yes	Infrequently	Never or not available	Very frequently (daily)	Infrequently	Never or not available	Never or not available	Never or not available	FrequentlyÂ (once a week)
4903023903									IUCN SSC member		IUCN WCPA member			Ghana	Male	FrequentlyÂ (once a week)		Not easy	Most of the good journals require payment in foreign currency. Transferring such monies from this country is very difficult, if not impossible.	Essential		African Primates	I prefer reading on a screen	I prefer the original hard copy		No	Sometimes (once a month)	Never or not available	Sometimes (once a month)	Never or not available	Sometimes (once a month)	FrequentlyÂ (once a week)	FrequentlyÂ (once a week)	Very frequently (daily)	Very frequently (daily)	Great positive effect		Moderate negative impact
4903023623												IUCN Secretariat staff		Seychelles	Male	Sometimes (once a month)		Easy	Other Staff of IUCN assist when necessary making access fast and efficient	Very important	Science is the basis for sound decision making. We should however be able to work without science thus me not rating this higher		I prefer printingÂ out to read	I prefer reading on a screen		No	Infrequently	Infrequently	Sometimes (once a month)	Infrequently	Never or not available	Sometimes (once a month)	FrequentlyÂ (once a week)	FrequentlyÂ (once a week)	Sometimes (once a month)	Moderate positive effect		Slight negative impact		No
4903023577											IUCN WCPA member			Spain	Female	Sometimes (once a month)		Not easy		Very important			I prefer reading on a screen	I prefer the original hard copy		Yes	FrequentlyÂ (once a week)	FrequentlyÂ (once a week)	FrequentlyÂ (once a week)	Never or not available	Never or not available	Infrequently	Infrequently	FrequentlyÂ (once a week)
4903023503		IUCN Government Agency Member												South Africa	Male	Very frequently (daily)		Not easy	Often requires subscription to online journals which my organisation will not pay.	Essential	I work as a scientist and hence access to scientific literature is essential.	Journal of Ecology	I prefer printingÂ out to read			No	Infrequently	Never or not available	Never or not available	Never or not available	FrequentlyÂ (once a week)	Never or not available	FrequentlyÂ (once a week)	Very frequently (daily)	Frequently (once a week)	Great positive effect		Great negative impact
4903022095				IUCN National NGO Member										Botswana	Male	Sometimes (once a month)		Not easy		Very important		HIV and AIDS related	I prefer printingÂ out to read			Yes	Sometimes (once a month)	Infrequently	Sometimes (once a month)	Never or not available	Never or not available	Never or not available	FrequentlyÂ (once a week)	FrequentlyÂ (once a week)
4903022048												IUCN Secretariat staff		Belgium	Female	FrequentlyÂ (once a week)		Not easy	Some of the literature I would like to make use of is not publicly accessible	Very important	In developing our programmatic and project work, it is important to be fully informed on current scientific knowledge. Also for influencing the EU policy developments for biodiversity, it is very helpful if there is access to the latest knowledge	Urban ecosystems	I prefer reading on a screen	I prefer printingÂ out to read		No	Never or not available	Never or not available	Never or not available	Infrequently	Sometimes (once a month)	Infrequently	Sometimes (once a month)	FrequentlyÂ (once a week)	Frequently (once a week)	Slight positive effect		Slight negative impact
4903019813												IUCN Secretariat staff		Switzerland	Male	Sometimes (once a month)		Easy		Very important		Biological Conservation Journal, Nature	I prefer reading on a screen	I prefer the original hard copy		Yes	Infrequently	Never or not available	FrequentlyÂ (once a week)	Infrequently	FrequentlyÂ (once a week)	FrequentlyÂ (once a week)	Never or not available	Very frequently (daily)
4903019655									IUCN SSC member					Philippines	Male	FrequentlyÂ (once a week)		Not easy	Limited access to online database	Very important			I prefer reading on a screen	I prefer the original hard copy		Yes	Never or not available	Infrequently	Sometimes (once a month)	Never or not available	Sometimes (once a month)	Sometimes (once a month)	Sometimes (once a month)	FrequentlyÂ (once a week)
4903018939										IUCN WCEL member				United Kingdom of Great Britain and Northern Ireland	Male	Infrequently		Easy		Not at all important		N/a	I prefer reading on a screen	I prefer reading on a screen		Yes	Very frequently (daily)	Never or not available	Never or not available	Never or not available	Never or not available	Never or not available	Never or not available	Sometimes (once a month)
4903017221						IUCN CEC member		IUCN CEM member			IUCN WCPA member			India	Male	Sometimes (once a month)		Easy		Very important		Springer	I prefer reading on a screen	I prefer reading on a screen		No	Never or not available	Infrequently	Sometimes (once a month)	Infrequently	Never or not available	Infrequently	Infrequently	Sometimes (once a month)	Sometimes (once a month)	Slight positive effect		Slight negative impact		The IUCN member of each group can circulate or send their papers (recent ones) to IUCN and then they can be sent to the members of the respective group
4903016139										IUCN WCEL member				Belgium	Female	FrequentlyÂ (once a week)		Easy		Very important			I prefer printingÂ out to read	I prefer the original hard copy		Yes	FrequentlyÂ (once a week)	Infrequently	FrequentlyÂ (once a week)	Infrequently	Sometimes (once a month)	Never or not available	Sometimes (once a month)	FrequentlyÂ (once a week)
4903016056										IUCN WCEL member				United Kingdom of Great Britain and Northern Ireland	Male	Infrequently
4903015261						IUCN CEC member								Pakistan	Female	FrequentlyÂ (once a week)		Easy		Very important			I prefer reading on a screen	I prefer the original hard copy		Yes	FrequentlyÂ (once a week)	Infrequently	FrequentlyÂ (once a week)	Never or not available	Never or not available	Never or not available	Never or not available	FrequentlyÂ (once a week)
4903015203									IUCN SSC member					United Kingdom of Great Britain and Northern Ireland	Male	Very frequently (daily)		Easy	I have university access to JSTOR and other pdf sources. I know many of the authors and can approach them privately. I have also been builting up a very large personal library of books, journals and separates for several decades. I can usually find 90% of the papers I require within a short time.	Essential	It is important for both IUCN based work and also for my own herpetological research. It would not be possible to do research without access to other research papers.	No one journal, Zootaxa (the hardest one to obtain), Copeia, J. Herpetology, Herpetologica, Molecular Phylogenetics & Evolution	I prefer the original hard copy	I prefer the original hard copy	Even if I have pdfs I prefer to obtain a hard copy original of papers. I am no fan of pdf books, some of which are scanned and distributed in breach of copyright. This adversely affects publishers and authors and as one of the latter I disapprove. Unless I plan to do a word search I also prefer to print a pdf of a paper to read it and file it.	Yes	Infrequently	Never or not available	Very frequently (daily)	Never or not available	FrequentlyÂ (once a week)	Very frequently (daily)	Infrequently	Very frequently (daily)						Only the scanning and sharing of in-print books in breach of copyright.
4903015202									IUCN SSC member					United Kingdom of Great Britain and Northern Ireland	Male	Sometimes (once a month)		Not easy		Somewhat important		Wiley	I prefer reading on a screen	I prefer printingÂ out to read		No	Infrequently	Sometimes (once a month)	Never or not available	Never or not available	Infrequently	FrequentlyÂ (once a week)	Infrequently	Very frequently (daily)	Sometimes (once a month)	Slight positive effect		Slight negative impact		No
4903014803													IUCN Specialist Otter Group	United Kingdom of Great Britain and Northern Ireland	Male	Sometimes (once a month)		Not easy	Normally the Abstract is available but full access is only possible if you pay.	Somewhat important		Elsevier	I prefer printingÂ out to read	I prefer the original hard copy		No	Never or not available	Never or not available	Never or not available	Never or not available	Never or not available	Never or not available	Never or not available	Sometimes (once a month)	Sometimes (once a month)	Slight positive effect		Slight negative impact	It is an irritant that not being attached to an Institution I can't easily access scientific papers
4903014226	IUCN State Member													United Kingdom of Great Britain and Northern Ireland	Male	Very frequently (daily)		Very easy	We are fortunate to have access to extensive library facilities through specific journal subscription, agreements with publishers and shared facilities via the UK University network and British Library.	Essential	Without supporting material it would be exceptionally difficult to be as informed as possible.	N/A - I have access tothe vast majority of journals	I prefer printingÂ out to read	I prefer the original hard copy		Yes	FrequentlyÂ (once a week)	Infrequently	Very frequently (daily)	Never or not available	Infrequently	Sometimes (once a month)	Infrequently	Very frequently (daily)						No
4903013593									IUCN SSC member					India	Male	Very frequently (daily)		Not easy	My organization does not have subscription of most of the scientific journals that I require for research papers.	Essential	I undertake population genetic research on Asian rhinos species as well as other threatened fauna in South and South East Asia, which makes it essential for me to have easy access to scientific literature.	Molecular Ecology	I prefer reading on a screen	I prefer the original hard copy		No	Infrequently	Sometimes (once a month)	Infrequently	Never or not available	FrequentlyÂ (once a week)	Never or not available	FrequentlyÂ (once a week)	Very frequently (daily)	Very frequently (daily)	Great positive effect	Important in keeping updated with the latest development in my field of research.	Moderate negative impact
4903013207									IUCN SSC member					South Africa	Male	Sometimes (once a month)		Easy	This depends on whether the paper is freely accessible. I do not have access to a university library system, so if a scientific paper is not freely available online (e.g. through google scholar), I often cannot get it.	Very important		Not sure, but probably one of the conservation journals (although I use a variety of journal types in addition to conservation ones). E.g. Conservation Biology, Biological Conservation. Much of the work I view is published in more local journals	I prefer reading on a screen	I prefer the original hard copy		No	Never or not available	Never or not available	Infrequently	Never or not available	Infrequently	Never or not available	Infrequently	Very frequently (daily)	Sometimes (once a month)	Moderate positive effect		Slight negative impact		Access to scientific literature is frequently a problem, although I can probably access 75% of the articles I need. However, most of this work is for non-IUCN related work
4903013040									IUCN SSC member					Philippines	Male	FrequentlyÂ (once a week)		Easy	Although I work in the Philippines I am connected to a Dutch University and have access to scientific litterature through the university's network and subscriptions. Also, with research gate and google scholar it is now much easier to find and download publications compared to 10 years ago. But my Philippine colleagues still find it hard to obtain scientific litterature, partly because of the lac…	Essential		Conservation Biology	I prefer reading on a screen	I prefer the original hard copy		Yes	FrequentlyÂ (once a week)	Infrequently	FrequentlyÂ (once a week)	Never or not available	Never or not available	Sometimes (once a month)	Infrequently	Very frequently (daily)
4903012158												IUCN Secretariat staff		Fiji	Male	FrequentlyÂ (once a week)		Easy	Publications available through the IUCN Library that ca be downloaded and through University library nearby	Essential	IUCN should be science based	the ones i need i access via the University Library	I prefer reading on a screen	I prefer the original hard copy		Yes	FrequentlyÂ (once a week)	Sometimes (once a month)	Never or not available	Infrequently	Never or not available	Never or not available	Never or not available	Very frequently (daily)
4903011647								IUCN CEM member						Australia	Male	Sometimes (once a month)		Very easy	I have an adjunct status at a university	Essential		Ecosystem services	I prefer reading on a screen	I prefer the original hard copy		Yes	Never or not available	Never or not available	Sometimes (once a month)	Never or not available	Never or not available	Never or not available	Never or not available	Sometimes (once a month)
4903011438									IUCN SSC member					Spain	Male	Infrequently		Easy		Very important		Zootaxa	I prefer reading on a screen			Yes	Infrequently	Never or not available	Very frequently (daily)	Never or not available	Sometimes (once a month)	Infrequently	FrequentlyÂ (once a week)	Very frequently (daily)
4903010053										IUCN WCEL member				Malaysia	Female	Very frequently (daily)
4903009546								IUCN CEM member			IUCN WCPA member			India	Male	Infrequently		Not easy		Essential		Nature	I prefer reading on a screen	I prefer the original hard copy		No	Infrequently	Never or not available	Never or not available	Never or not available	Infrequently	Infrequently	Sometimes (once a month)	Very frequently (daily)	Sometimes (once a month)	Great positive effect		Great negative impact
4903009397									IUCN SSC member					India	Male	FrequentlyÂ (once a week)		Not easy		Essential			I prefer printingÂ out to read	I prefer the original hard copy		Yes	Very frequently (daily)	FrequentlyÂ (once a week)	Very frequently (daily)	Infrequently	Never or not available	Never or not available	Infrequently	Very frequently (daily)
4903009346									IUCN SSC member					United Arab Emirates	Female	FrequentlyÂ (once a week)		Not easy		Somewhat important			I prefer printingÂ out to read	I prefer the original hard copy		No	FrequentlyÂ (once a week)	Never or not available	Infrequently	Never or not available	Sometimes (once a month)	Never or not available	Infrequently	FrequentlyÂ (once a week)	Frequently (once a week)	Moderate positive effect		Slight negative impact
4903009064						IUCN CEC member						IUCN Secretariat staff		Serbia	Female	Sometimes (once a month)		Easy		Somewhat important			I prefer reading on a screen	I prefer printingÂ out to read		Yes	Sometimes (once a month)	Infrequently	Infrequently	Never or not available	Never or not available	Never or not available	Never or not available	Infrequently
4903008408												IUCN Secretariat staff		Jordan	Male	Infrequently
4903007576				IUCN National NGO Member										The Netherlands	Female	Very frequently (daily)		Easy		Essential			I prefer printingÂ out to read	I prefer the original hard copy		Yes	Sometimes (once a month)	Never or not available	Very frequently (daily)	Never or not available	Sometimes (once a month)	Never or not available	Sometimes (once a month)	Sometimes (once a month)
4903006687		IUCN Government Agency Member									IUCN WCPA member			South Sudan	Male	Infrequently		Not at all easy	The Library is little known and there is need for members to know it to be able to use it. Access to the internet is also a problem in my country.	Very important	As member of the IUCN, I need frequent updates	Journal of Protected Areas	I prefer reading on a screen	I prefer the original hard copy	N/A	No	Never or not available	Never or not available	Never or not available	Never or not available	Never or not available	Never or not available	Infrequently	FrequentlyÂ (once a week)	Infrequently	Great positive effect	Quick access to information	Great negative impact	It is important to update information as there are frequent changes to the environment due to climate change	will the library be accessed at any time, password needed
4903004636									IUCN SSC member					India	Male	Sometimes (once a month)		Very easy		Essential		BNHS	I prefer reading on a screen	I prefer reading on a screen		No	Sometimes (once a month)	Infrequently	Never or not available	Never or not available	Infrequently	Never or not available	Never or not available	FrequentlyÂ (once a week)	Very frequently (daily)	Great positive effect		Slight negative impact
4903003616									IUCN SSC member					Egypt	Male	Sometimes (once a month)		Not easy		Very important		live science journal -- http://www.livescience.com/	I prefer reading on a screen	I prefer the original hard copy		No	FrequentlyÂ (once a week)	Sometimes (once a month)	FrequentlyÂ (once a week)	Infrequently	Never or not available	Never or not available	Sometimes (once a month)	Very frequently (daily)	Frequently (once a week)	Moderate positive effect	Improve the performance of work by relying on data and research reports documented and updated.	Great negative impact	1- Through wasted much time in search. 2- In many cases are getting unreliable data.	No
4903002302														Bangladesh	Male	Infrequently		Easy		Somewhat important		Natural resource management	I prefer reading on a screen	I prefer the original hard copy		No	Never or not available	FrequentlyÂ (once a week)	Sometimes (once a month)	FrequentlyÂ (once a week)	Sometimes (once a month)	Never or not available	Sometimes (once a month)	Sometimes (once a month)	Infrequently	Slight positive effect		Moderate negative impact
4903001272											IUCN WCPA member			New Zealand	Male	Infrequently		Easy		Somewhat important		Journal of leisure research	I prefer reading on a screen	I prefer the original hard copy		No	Never or not available	Never or not available	Never or not available	Never or not available	Never or not available	Never or not available	Never or not available	Sometimes (once a month)	Infrequently	Slight positive effect		Slight negative impact
4903000556								IUCN CEM member						Nepal	Male	Infrequently		Easy		Very important			I prefer reading on a screen	I prefer reading on a screen		No	FrequentlyÂ (once a week)	Sometimes (once a month)	Never or not available	Never or not available	Sometimes (once a month)	Infrequently	FrequentlyÂ (once a week)	FrequentlyÂ (once a week)	Very frequently (daily)	Slight positive effect		Slight negative impact
4902999218						IUCN CEC member								Jordan	Female	Very frequently (daily)		Not easy	it take some time to explore the internet to find scientific resources that is related to my filed	Essential			I prefer printingÂ out to read	I prefer the original hard copy		No	Never or not available	Never or not available	Never or not available	Never or not available	Never or not available	Never or not available	Never or not available	Very frequently (daily)	Frequently (once a week)	Great positive effect		Moderate negative impact
4902998075									IUCN SSC member					Belgium	Male	Sometimes (once a month)		Not easy	as a retired lecturer it becomes more difficult as a lot of sites ask for an actual affiliation to a scientific institution	Very important		forktail	I prefer printingÂ out to read	I prefer the original hard copy		No	Never or not available	Never or not available	Never or not available	Never or not available	Sometimes (once a month)	Sometimes (once a month)	FrequentlyÂ (once a week)	Very frequently (daily)	Sometimes (once a month)	Moderate positive effect		Slight negative impact
4902997965												IUCN Secretariat staff		Switzerland	Female	Sometimes (once a month)		Not easy		Very important		Environmental Impact Assessment Review	I prefer reading on a screen			No	Infrequently	Never or not available	Never or not available	Never or not available	Infrequently	Never or not available	FrequentlyÂ (once a week)	FrequentlyÂ (once a week)	Sometimes (once a month)	Moderate positive effect		Moderate negative impact
4902997056									IUCN SSC member					United Kingdom of Great Britain and Northern Ireland	Female	FrequentlyÂ (once a week)		Not at all easy	My organisation does not belong to the kind of academic libraries I need access to, and access via the state library system is difficult and expensive.	Very important		Cnservation Biology	I prefer reading on a screen	I prefer the original hard copy		No	Never or not available	Infrequently	Never or not available	Never or not available	Sometimes (once a month)	FrequentlyÂ (once a week)	Very frequently (daily)	Very frequently (daily)	Very frequently (daily)	Great positive effect		Slight negative impact	I have become skilled at finding the data from other sources, such as the corresponding author, asking friends who do have access, and using free resources. However this does not always work, and then I have to personally pay for what I need which is expensive
4902996801									IUCN SSC member					Czech Republic	Male	Sometimes (once a month)		Easy		Essential		many different, cannot specify	I prefer reading on a screen	I prefer the original hard copy		Yes	Sometimes (once a month)	Infrequently	FrequentlyÂ (once a week)	Never or not available	Infrequently	Infrequently	Never or not available	FrequentlyÂ (once a week)
4902996765									IUCN SSC member					Rwanda	Male	FrequentlyÂ (once a week)		Not easy	Most of libraries require membership and a password for access. I usually use my alma mater universities but usually my library access and membership expires quite quickly.	Very important	we have been working on evaluating and updating primate species threat categories and that require references and literature review.	International Journal of Primatology	I prefer reading on a screen			Yes	FrequentlyÂ (once a week)	Never or not available	FrequentlyÂ (once a week)	Never or not available	Infrequently	Never or not available	Infrequently	FrequentlyÂ (once a week)						I would like to have access to IUCN library
4902996716									IUCN SSC member					Hungary	Male	Very frequently (daily)		Not easy	Some old literatures are difficult to access	Essential		there is not only one	I prefer reading on a screen	I prefer reading on a screen		No	FrequentlyÂ (once a week)	Never or not available	Infrequently	Never or not available	Sometimes (once a month)	Never or not available	Sometimes (once a month)	Very frequently (daily)	Sometimes (once a month)	Slight positive effect	The matter is not the current literature. That can be accessed in various different ways. Old papers in minor journals or in edited volumes or old books are difficult to find. Such literature is partly but not fully available on Biodiversity Heritage Library or Animal Base.	Slight negative impact
4902995255						IUCN CEC member								Austria	Male	Infrequently		Very easy	Since I rarely need to access scientific literature, it is hard to say if it would be difficult or very easy. So not sure to what degree my answer here is very useful for you.	Somewhat important	It is important insofar as I need to inform myself about a certain topic. I work generally in academia, research, civil society where I need to be sure of facts when discussing a topic. It's generally just a question for me of how often I need to deal with a specifically IUCN-related issue.	n/a	I prefer reading on a screen			No	Never or not available	Never or not available	Never or not available	Never or not available	Infrequently	Infrequently	Infrequently	Very frequently (daily)	Sometimes (once a month)	Slight positive effect		Slight negative impact
4902995166							IUCN CEESP member							Pakistan	Male	Sometimes (once a month)		Easy		Very important			I prefer reading on a screen	I prefer reading on a screen		No	Never or not available	Never or not available	Never or not available	Never or not available	Infrequently	Infrequently	Infrequently	FrequentlyÂ (once a week)	Infrequently	Moderate positive effect		Slight negative impact
4902993500									IUCN SSC member					United Kingdom of Great Britain and Northern Ireland	Male	Infrequently		Not easy		Somewhat important			I prefer printingÂ out to read	I prefer the original hard copy		Yes	Infrequently	Never or not available	Infrequently	Never or not available	Infrequently	Infrequently	Infrequently	Sometimes (once a month)
4902991981												IUCN Secretariat staff		United Kingdom of Great Britain and Northern Ireland	Female	FrequentlyÂ (once a week)		Not easy		Essential		Science	I prefer printingÂ out to read	I prefer the original hard copy		Yes	Infrequently	Infrequently	FrequentlyÂ (once a week)	Never or not available	Infrequently	Sometimes (once a month)	Very frequently (daily)	Very frequently (daily)
4902991826							IUCN CEESP member		IUCN SSC member					Austria	Male	Sometimes (once a month)		Not easy	A database with IUCN-related papers would be really helpful.	Very important		eco.mont	I prefer the original hard copy	I prefer the original hard copy	additionally the pdf-file is very helpful	No	FrequentlyÂ (once a week)	Never or not available	Never or not available	Never or not available	FrequentlyÂ (once a week)	FrequentlyÂ (once a week)	FrequentlyÂ (once a week)	FrequentlyÂ (once a week)		Moderate positive effect		Moderate negative impact		I really like the IUCN-idea. I would wish to get fewer E-Mails
4902991824									IUCN SSC member					Madagascar	Male	Very frequently (daily)		Not easy		Essential			I prefer reading on a screen	I prefer reading on a screen		Yes	Infrequently	Never or not available	FrequentlyÂ (once a week)	Infrequently	FrequentlyÂ (once a week)	Never or not available	Never or not available	Very frequently (daily)
4902991745						IUCN CEC member								United Kingdom of Great Britain and Northern Ireland	Female	FrequentlyÂ (once a week)		Not easy		Somewhat important			I prefer reading on a screen	I prefer reading on a screen		Yes	Sometimes (once a month)	FrequentlyÂ (once a week)	Very frequently (daily)	Never or not available	Infrequently	Never or not available	Sometimes (once a month)	Very frequently (daily)
4902990724									IUCN SSC member					Pakistan	Male	FrequentlyÂ (once a week)		Easy		Very important			I prefer reading on a screen	I prefer reading on a screen		Yes	Sometimes (once a month)	Never or not available	Very frequently (daily)	Never or not available	Infrequently	Never or not available	Never or not available	Infrequently
4902990591								IUCN CEM member						Sri Lanka	Male	Very frequently (daily)		Easy		Very important		Biodiversity and Conservation	I prefer printingÂ out to read	I prefer the original hard copy		No	Infrequently	Never or not available	Infrequently	Never or not available	Sometimes (once a month)	Never or not available	FrequentlyÂ (once a week)	Very frequently (daily)	Frequently (once a week)	Great positive effect		Moderate negative impact
4902989626							IUCN CEESP member	IUCN CEM member						United States of America	Male	Sometimes (once a month)		Very easy	I work as a contractor at NASA-GFSC, and my wife is a senior research ecologist with the USGS. As such I have ready access to literature. If I was no longer with NASA I would have great difficulty accessing necessary literature.	Somewhat important	It depends on the specific topic. Many things need no scientific literature at all, others require considerable access. To date much of my IUCN work has not needed much access. The one real exception was a literature review that a couple of us worked on, and that required extensive access. I would say that overall it is not necessary, but without the access it would greatly limit what can be done.	I have not been tracking which journals I access most fequently. It depends on what I am focusing on. Sorry.	I prefer reading on a screen	I prefer reading on a screen	I keep extensive digital archives of literature, and prefer to scan copies of even old literature when allowed -- tracking down a bulletin published in 1928 took me a long time, and was one of the first forest/runnoff feedback experimental studies published. If I ever need to consult it again I have it.	Yes	Sometimes (once a month)	Infrequently	Very frequently (daily)	Never or not available	Infrequently	Infrequently	Sometimes (once a month)	Very frequently (daily)						I hate to admit it, but it never occurred to me to bother IUCN's librarian with requests. Fortunately the research library at NASA can get a lot of stuff through inter library loan. When that fails, I start reaching out to various colleagues, etc. They also make requests of me from time to time. It is good to know that I would have access to the IUCN librarian when needed, and that will definitel…
4902989564									IUCN SSC member					Spain	Male	Sometimes (once a month)		Easy		Essential		Oryx	I prefer reading on a screen	I prefer the original hard copy		Yes	FrequentlyÂ (once a week)	Never or not available	FrequentlyÂ (once a week)	Infrequently	Infrequently	Never or not available	Infrequently	Very frequently (daily)
4902989255									IUCN SSC member					India	Male	FrequentlyÂ (once a week)		Not easy		Essential			I prefer reading on a screen	I prefer reading on a screen		No	Never or not available	Never or not available	Never or not available	Never or not available	Sometimes (once a month)	Never or not available	Sometimes (once a month)	Very frequently (daily)	Very frequently (daily)	Moderate positive effect		Slight negative impact
4902988910		IUCN Government Agency Member							IUCN SSC member					United States of America	Male	FrequentlyÂ (once a week)		Easy		Very important		Journal of Wildlife Management	I prefer reading on a screen	I prefer the original hard copy		Yes	Infrequently	Infrequently	FrequentlyÂ (once a week)	Never or not available	Infrequently	Sometimes (once a month)	Never or not available	Sometimes (once a month)
4902988789										IUCN WCEL member				Iran (Islamic Republic of)	Female	FrequentlyÂ (once a week)		Not at all easy	As an environmental lawyer and WCEL member residing in Iran, It is not easy for me to obtain scientific literature due to domestic technical deficiencies such as low internet speed, governmental censorship and of course, the remaining consequences of sanctions against Iran, even after Nuclear Deal.	Essential		The Journal of Environmental Law (OXFORD)	I prefer reading on a screen	I prefer reading on a screen		No	Never or not available	Never or not available	Never or not available	Never or not available	Infrequently	Never or not available	Infrequently	FrequentlyÂ (once a week)	Frequently (once a week)	Great positive effect	Thinking and writing on scientific subjects without having access to reliable, up to date scientific literature is not possible in reality, maybe in unreal imaginary world of wizards!!1	Great negative impact		I think IUCN as a global institution aimed at peace through environmental conservation should facilitate information sharing as an important aspect of the right to information for all.
4902988749									IUCN SSC member					Canada	Female	Very frequently (daily)		Not at all easy		Essential			I prefer printingÂ out to read	I prefer reading on a screen		No	Never or not available	Never or not available	Never or not available	Never or not available	Sometimes (once a month)	Never or not available	FrequentlyÂ (once a week)	Very frequently (daily)	Frequently (once a week)	Great positive effect		Great negative impact
4902988519	IUCN State Member							IUCN CEM member	IUCN SSC member		IUCN WCPA member			South Africa	Male	Sometimes (once a month)		Not easy	I can only access what is freely available on the internet	Somewhat important		biological conservation	I prefer reading on a screen	I prefer the original hard copy		No	Never or not available	Never or not available	Never or not available	Never or not available	Infrequently	Never or not available	Sometimes (once a month)	FrequentlyÂ (once a week)	Sometimes (once a month)	Moderate positive effect		Slight negative impact
4902988514								IUCN CEM member						Kenya	Male	Sometimes (once a month)
4902988420								IUCN CEM member	IUCN SSC member					Bangladesh	Male	Sometimes (once a month)		Not easy		Somewhat important		Herpetological	I prefer reading on a screen	I prefer the original hard copy		No	Never or not available	Infrequently	Never or not available	Infrequently	Sometimes (once a month)	Never or not available	Sometimes (once a month)	FrequentlyÂ (once a week)	Frequently (once a week)	Moderate positive effect		Slight negative impact		No
4902987994									IUCN SSC member					United Kingdom of Great Britain and Northern Ireland	Female	FrequentlyÂ (once a week)		Not easy	Some papers are easy to access but others are not available without a charge. It was easier when a student as the university had greater access to journals.	Essential			I prefer printingÂ out to read	I prefer printingÂ out to read	I prefer printing out but most often read from a screen to minimise paper usage.	Yes	Sometimes (once a month)	Never or not available	Sometimes (once a month)	Never or not available	Infrequently	Never or not available	Sometimes (once a month)	Sometimes (once a month)
4902987698									IUCN SSC member					Germany	Male	FrequentlyÂ (once a week)		Very easy	I have institutional access to most relevant journals and databases	Essential		I don't rely on a specific journal. From my tasks and activities it's not useful to focus only on one journal.	I prefer reading on a screen	I prefer the original hard copy		Yes	Sometimes (once a month)	Infrequently	Very frequently (daily)	Infrequently	Sometimes (once a month)	Sometimes (once a month)	Infrequently	Very frequently (daily)
4902987014												IUCN Secretariat staff		Maldives	Female	Very frequently (daily)		Not easy		Essential		Ecology letters	I prefer reading on a screen	I prefer reading on a screen		No	Never or not available	Never or not available	FrequentlyÂ (once a week)	Never or not available	Infrequently	Never or not available	FrequentlyÂ (once a week)	Very frequently (daily)	Very frequently (daily)	Great positive effect		Moderate negative impact
4902986530							IUCN CEESP member				IUCN WCPA member			South Africa	Male	FrequentlyÂ (once a week)		Not easy		Essential		Nature	I prefer reading on a screen	I prefer reading on a screen		No	Never or not available	Infrequently	Never or not available	Infrequently	Sometimes (once a month)	FrequentlyÂ (once a week)	FrequentlyÂ (once a week)	FrequentlyÂ (once a week)	Frequently (once a week)	Great positive effect		Slight negative impact
4902986276							IUCN CEESP member		IUCN SSC member					India	Male	Sometimes (once a month)		Not easy		Very important		Zoo Biology	I prefer reading on a screen	I prefer the original hard copy		No	FrequentlyÂ (once a week)	Sometimes (once a month)	Sometimes (once a month)	Sometimes (once a month)	FrequentlyÂ (once a week)	Never or not available	FrequentlyÂ (once a week)	Very frequently (daily)	Very frequently (daily)	Great positive effect		Slight negative impact
4902985790									IUCN SSC member					Hong Kong, China	Male	Sometimes (once a month)		Easy	Many are now available through Google scholar.	Somewhat important		Bird Conservation International	I prefer printingÂ out to read	I prefer the original hard copy	The preferences shown above are just marginally and in many cases I could read literature on a screen.	No	Sometimes (once a month)	Never or not available	Never or not available	Never or not available	Infrequently	FrequentlyÂ (once a week)	FrequentlyÂ (once a week)	Very frequently (daily)	Infrequently	Slight positive effect		Slight negative impact
4902985770									IUCN SSC member					United Kingdom of Great Britain and Northern Ireland	Male	Very frequently (daily)		Very easy	Via links to UK-based universities, Research Gate, etc.and taking advantage of good internet speeds.	Essential		I already have access to the journals I need.	I prefer reading on a screen	I prefer the original hard copy		Yes	Infrequently	Never or not available	FrequentlyÂ (once a week)	Never or not available	Very frequently (daily)	FrequentlyÂ (once a week)	Infrequently	Very frequently (daily)
4902985455									IUCN SSC member					Bahrain	Male	FrequentlyÂ (once a week)		Very easy	Work in a University - good library access	Essential	Working on a review of the status of all Australian frog species for Australian government and IUCN - looked at all sorts of data	no one journal as I needed species specifc data not more general ideas	I prefer reading on a screen	I prefer the original hard copy		Yes	Very frequently (daily)	Never or not available	Very frequently (daily)	Never or not available	Infrequently	Infrequently	Infrequently	Sometimes (once a month)
4902985348							IUCN CEESP member							China	Female	FrequentlyÂ (once a week)
4902985093									IUCN SSC member					Germany	Male	FrequentlyÂ (once a week)		Very easy	online access too a large number of journals through the university library and institute subscriptions	Very important		no single journal	I prefer reading on a screen	I prefer the original hard copy		Yes	Very frequently (daily)	Never or not available	Very frequently (daily)	Never or not available	Infrequently	Sometimes (once a month)	Sometimes (once a month)	Sometimes (once a month)
4902984900			IUCN International NGO Member						IUCN SSC member					United Kingdom of Great Britain and Northern Ireland	Male	FrequentlyÂ (once a week)		Very easy	I am based in Cambridge Conservation Initiative with WCS	Very important	I use it for species listings on the red site and also tracking what methods people are using elsewhere in conservation	Journal of Applied Ecology and Biological Conservation	I prefer printingÂ out to read			Yes	Sometimes (once a month)	Infrequently	Very frequently (daily)	Never or not available	Infrequently	Sometimes (once a month)	Never or not available	Sometimes (once a month)
4902984066									IUCN SSC member					Germany	Male	Infrequently		Not easy		Very important			I prefer reading on a screen	I prefer the original hard copy		No	FrequentlyÂ (once a week)	Sometimes (once a month)	Never or not available	Infrequently	Infrequently	Infrequently	Sometimes (once a month)	FrequentlyÂ (once a week)	Frequently (once a week)	Great positive effect		Moderate negative impact
4902983502	IUCN State Member				IUCN Affiliate Member				IUCN SSC member					Indonesia	Male	Sometimes (once a month)		Not easy	we have no subscription. Institutional library is not useful for this purpose.	Very important	New information might alter IUCN redlist status. New described species might also alter IUCN redlist status.	Zootaxa	I prefer printingÂ out to read	I prefer the original hard copy		No	Never or not available	Never or not available	Never or not available	Never or not available	FrequentlyÂ (once a week)	Never or not available	Sometimes (once a month)	FrequentlyÂ (once a week)	Sometimes (once a month)	No effect at allÂ	All the journal with institutional acces are not related to IUCN work.	Great negative impact	It is difficult to obtain certain information which in many cases indispensable	Our work with IUCN is heavily incapacited by the lack of resources.
4902982497											IUCN WCPA member				Male	Infrequently
4902982007						IUCN CEC member			IUCN SSC member			IUCN Secretariat staff		Thailand	Female	FrequentlyÂ (once a week)		Not easy	The journals I need are normally blocked, unless I have a paid account with them.	Very important	As a scientific organization, I think it is basic that IUCN has access to scientific journals.	Elsevier and Springer - ecology, wetlands management, marine pollution	I prefer printingÂ out to read	I prefer printingÂ out to read		No	Never or not available	Sometimes (once a month)	FrequentlyÂ (once a week)	FrequentlyÂ (once a week)	Infrequently	FrequentlyÂ (once a week)	FrequentlyÂ (once a week)	Very frequently (daily)	Frequently (once a week)	Great positive effect		Moderate negative impact
4902981937									IUCN SSC member					United Kingdom of Great Britain and Northern Ireland	Male	Very frequently (daily)		Not easy	I have to ask a favour of someone in an institution with online library access each time I need to look at a journal without open access	Essential		Biological Conservation	I prefer printingÂ out to read	I prefer the original hard copy	It depends of course on how much I want from each publication, On screen is fine for some purposes	No	Sometimes (once a month)	Never or not available	Never or not available	Never or not available	Infrequently	FrequentlyÂ (once a week)	Very frequently (daily)	Very frequently (daily)	Frequently (once a week)	Great positive effect		Slight negative impact
4902981612				IUCN National NGO Member					IUCN SSC member					Indonesia	Male	FrequentlyÂ (once a week)		Easy		Very important		Redlist and SSC	I prefer reading on a screen	I prefer reading on a screen		No	Sometimes (once a month)	Sometimes (once a month)	Sometimes (once a month)	Sometimes (once a month)	Sometimes (once a month)	Sometimes (once a month)	Sometimes (once a month)	Sometimes (once a month)	Frequently (once a week)	Great positive effect		No impact at all		No thanks
4902981538							IUCN CEESP member	IUCN CEM member	IUCN SSC member		IUCN WCPA member			The Netherlands	Male	FrequentlyÂ (once a week)		Very easy	University subscription	Essential	Basis of our work	Human Ecology	I prefer reading on a screen	I prefer reading on a screen		Yes	Very frequently (daily)	Infrequently	Very frequently (daily)	Never or not available	Sometimes (once a month)	Never or not available	Never or not available	FrequentlyÂ (once a week)						Yes get IUCN commission memebers to subscribe to Research Gate and Academia were you can get articles for free from the authors
4902981125												IUCN Secretariat staff		Cambodia	Male	Sometimes (once a month)		Easy		Very important		IUCN Red List of Threatened Species	I prefer reading on a screen	I prefer reading on a screen		Yes	Sometimes (once a month)	Sometimes (once a month)	Sometimes (once a month)	FrequentlyÂ (once a week)	Infrequently	Sometimes (once a month)	Sometimes (once a month)	Sometimes (once a month)						It is even better if scientific literature can be sent to us in PDF file, where we can save it directly into our document.
4902980183										IUCN WCEL member				Belgium	Male	FrequentlyÂ (once a week)		Very easy	#NAME?	Very important			I prefer printingÂ out to read	I prefer printingÂ out to read		Yes	FrequentlyÂ (once a week)	Sometimes (once a month)	FrequentlyÂ (once a week)	Infrequently	Infrequently	Never or not available	Never or not available	FrequentlyÂ (once a week)
4902980171				IUCN National NGO Member										Kenya	Female	Sometimes (once a month)
4902979695				IUCN National NGO Member							IUCN WCPA member			Russian Federation	Female	Sometimes (once a month)		Easy		Very important		Parks	I prefer the original hard copy			Yes	Sometimes (once a month)	Never or not available	Infrequently	Infrequently	Infrequently	Infrequently	Sometimes (once a month)	Sometimes (once a month)
4902978663							IUCN CEESP member		IUCN SSC member					Australia	Male	FrequentlyÂ (once a week)		Not easy		Very important		Nature	I prefer reading on a screen	I prefer the original hard copy		Yes	Very frequently (daily)	Never or not available	Very frequently (daily)	Never or not available	Infrequently	Never or not available	Sometimes (once a month)	Very frequently (daily)
4902978450									IUCN SSC member					Malaysia	Male	FrequentlyÂ (once a week)		Not easy		Very important			I prefer reading on a screen	I prefer reading on a screen		Yes	Infrequently	Infrequently	FrequentlyÂ (once a week)	Never or not available	Sometimes (once a month)	Never or not available	Infrequently	FrequentlyÂ (once a week)
4902977389										IUCN WCEL member				United Kingdom of Great Britain and Northern Ireland	Male	Sometimes (once a month)
4902976734									IUCN SSC member					Italy	Male	Sometimes (once a month)		Easy		Essential		Conservation Genetics	I prefer printingÂ out to read	I prefer printingÂ out to read		Yes	Infrequently	Never or not available	FrequentlyÂ (once a week)	Never or not available	Infrequently	Never or not available	Never or not available	Sometimes (once a month)
4902976543		IUCN Government Agency Member							IUCN SSC member				Program officer of SG	United Arab Emirates	Male	FrequentlyÂ (once a week)		Not easy		Very important			I prefer reading on a screen	I prefer the original hard copy		Yes	Never or not available	Never or not available	Never or not available	Infrequently	Sometimes (once a month)	Infrequently	Sometimes (once a month)	Sometimes (once a month)
4902976540							IUCN CEESP member	IUCN CEM member						Italy	Male	Infrequently		Very easy		Very important			I prefer reading on a screen	I prefer reading on a screen		No	Never or not available	Infrequently	Never or not available	Infrequently	Infrequently	FrequentlyÂ (once a week)	Never or not available	Very frequently (daily)	Infrequently	Slight positive effect		Slight negative impact
4902976436									IUCN SSC member					New Zealand	Female	FrequentlyÂ (once a week)
4902975152				IUCN National NGO Member										Portugal	Female	Sometimes (once a month)		Not easy		Very important			I prefer printingÂ out to read	I prefer printingÂ out to read		No	Sometimes (once a month)	Infrequently	Never or not available	Never or not available	Never or not available	Never or not available	Sometimes (once a month)	FrequentlyÂ (once a week)	Sometimes (once a month)	Great positive effect		Slight negative impact
4902974699								IUCN CEM member						Rwanda	Female	Sometimes (once a month)		Not at all easy		Very important			I prefer reading on a screen	I prefer reading on a screen		No	Infrequently	Infrequently	Never or not available	Infrequently	Infrequently	Never or not available	Sometimes (once a month)	FrequentlyÂ (once a week)	Sometimes (once a month)	Moderate positive effect		Moderate negative impact
4902974476											IUCN WCPA member			Italy	Male	Sometimes (once a month)
4902974283									IUCN SSC member					Turkey	Male	FrequentlyÂ (once a week)		Easy		Essential		journals publshing on ecology, biodiversity IAS	I prefer reading on a screen	I prefer the original hard copy	Online boks also welcome because it helps me keep space in my Office.	Yes	Infrequently	Never or not available	Very frequently (daily)	Never or not available	Infrequently	Infrequently	Infrequently	Sometimes (once a month)
4902973868									IUCN SSC member					United Kingdom of Great Britain and Northern Ireland	Male	Very frequently (daily)		Not easy	I do not have access to the IUCN online library. I do not know of a well-planned subject index of the contents of the library.	Essential		Absurd question - we need access to 100s	I prefer printingÂ out to read	I prefer reading on a screen	pdfs are best	Yes	Infrequently	Never or not available	FrequentlyÂ (once a week)	Infrequently	Infrequently	Never or not available	Never or not available	Very frequently (daily)						If you want to inform the conservation community then give all SSC members online access to a large array of the world journals with articles on conservation and ecology.
4902973262									IUCN SSC member					Italy	Male	Never
4902972823									IUCN SSC member					Belize	Female	Very frequently (daily)		Not easy	I have no access to journals and have to contact authors to get the paper. A time-consuming hit and miss affair.	Essential	If you don't read the scientific literature regularly you can't put your work into context and learn novel and often better ways of conducting conservation science.	Reductionism does not work with respect to access to scientific literature. There is no single journal. There are many.	I prefer reading on a screen	I prefer reading on a screen		No	Never or not available	Never or not available	Never or not available	Never or not available	FrequentlyÂ (once a week)	Never or not available	FrequentlyÂ (once a week)	FrequentlyÂ (once a week)	Very frequently (daily)	Great positive effect		Moderate negative impact
4902972453				IUCN National NGO Member		IUCN CEC member			IUCN SSC member					India	Female	FrequentlyÂ (once a week)		Not easy	Most scientific papers are published in journals that will need paid access.	Very important		Academia .edu	I prefer reading on a screen	I prefer the original hard copy		No	Infrequently	Infrequently	Sometimes (once a month)	Infrequently	FrequentlyÂ (once a week)	FrequentlyÂ (once a week)	FrequentlyÂ (once a week)	Very frequently (daily)	Sometimes (once a month)	Great positive effect		Moderate negative impact
4902972450									IUCN SSC member					Reunion, France	Male	Very frequently (daily)		Easy	I have access to partner organisation (IRD) subscriptions. However I have serious problem to get scientific papers that not covered by that subscription.	Essential		Marine Ecology Progress Series	I prefer printingÂ out to read	I prefer the original hard copy		Yes	Never or not available	Never or not available	Very frequently (daily)	Never or not available	Infrequently	Never or not available	Infrequently	Sometimes (once a month)
4902972256							IUCN CEESP member							United States of America	Female	Sometimes (once a month)		Very easy	member of academia	Essential		Human Ecology? Really require broad range	I prefer reading on a screen	I prefer the original hard copy		Yes	Never or not available	Never or not available	FrequentlyÂ (once a week)	Never or not available	Never or not available	Never or not available	Never or not available	Very frequently (daily)						Thank you for this survey! Scientific literature is critical to good work.
4902971968									IUCN SSC member					Switzerland	Male	Very frequently (daily)		Easy	Web of knowledge; access provided by my institution	Essential		The Lichenologist	I prefer printingÂ out to read	I prefer printingÂ out to read		Yes	Very frequently (daily)	Infrequently	Very frequently (daily)	Never or not available	Sometimes (once a month)	Very frequently (daily)	Never or not available	Very frequently (daily)
4902971522						IUCN CEC member								South Africa	Male	Infrequently
4902971480													IUCN National Committee	The Netherlands	Male	Infrequently		Easy		Very important			I prefer reading on a screen	I prefer printingÂ out to read		No	Infrequently	Never or not available	Never or not available	Never or not available	Infrequently	Infrequently	Infrequently	Sometimes (once a month)	Sometimes (once a month)	Moderate positive effect		Slight negative impact
4902970917									IUCN SSC member					Kenya	Female	FrequentlyÂ (once a week)		Not easy		Very important		Nature	I prefer reading on a screen	I prefer the original hard copy		Yes	Infrequently	Never or not available	FrequentlyÂ (once a week)	Never or not available	Infrequently	Never or not available	Infrequently	FrequentlyÂ (once a week)
4902970483													H.Q Staff	Switzerland	Male	Infrequently		Easy		Somewhat important			I prefer reading on a screen			No	Never or not available	Infrequently	Sometimes (once a month)	Never or not available	Never or not available	FrequentlyÂ (once a week)	Sometimes (once a month)	FrequentlyÂ (once a week)	Sometimes (once a month)	Slight positive effect		No impact at all
4902970142											IUCN WCPA member			Singapore	Male	FrequentlyÂ (once a week)		Not at all easy		Very important		Any	I prefer printingÂ out to read	I prefer printingÂ out to read		No	Never or not available	Sometimes (once a month)	Never or not available	Never or not available	Never or not available	Sometimes (once a month)	Very frequently (daily)	Very frequently (daily)	Frequently (once a week)	Great positive effect		Moderate negative impact
4902969728													karst	Italy	Male	Infrequently		Easy		Somewhat important			I prefer reading on a screen	I prefer reading on a screen		Yes	FrequentlyÂ (once a week)	Never or not available	Infrequently	Never or not available	Sometimes (once a month)	Very frequently (daily)	Sometimes (once a month)	Infrequently
4902969434									IUCN SSC member					South Africa	Male	Very frequently (daily)		Easy		Essential		Nature	I prefer printingÂ out to read	I prefer the original hard copy		Yes	Infrequently	Never or not available	Very frequently (daily)	Never or not available	Infrequently	Never or not available	Infrequently	FrequentlyÂ (once a week)						It would be very helpful to have greater access to journals that are not open-access as my institution does not subscribe to many in my field of research
4902969362							IUCN CEESP member							United Kingdom of Great Britain and Northern Ireland	Female	FrequentlyÂ (once a week)		Very easy		Essential			I prefer printingÂ out to read	I prefer printingÂ out to read		Yes	Infrequently	Infrequently	Very frequently (daily)	Sometimes (once a month)	FrequentlyÂ (once a week)	Never or not available	Never or not available	Very frequently (daily)
4902969200									IUCN SSC member					Israel	Male	Very frequently (daily)		Easy		Essential		conservation biology	I prefer reading on a screen	I prefer the original hard copy		Yes	Infrequently	Never or not available	Very frequently (daily)	Never or not available	Sometimes (once a month)	Infrequently	Sometimes (once a month)	Very frequently (daily)
4902968919									IUCN SSC member					Malta	Male	Sometimes (once a month)		Not easy	Several papers are on paysites that require a paid membership. Other papers are sometimes old and not found online, although this is not a problem as is the above. Research gate makes the option Not easy instead not at all easy.	Essential	Reference to published work is essential to IUCN redlist assessments.	Several to mention, here's the most important: Webbia, Bocconea, Flora Mediterranea, Taxon, Journal of European Orchids.	I prefer printingÂ out to read	I prefer the original hard copy		No	FrequentlyÂ (once a week)	Never or not available	Never or not available	Never or not available	Sometimes (once a month)	Never or not available	Sometimes (once a month)	Very frequently (daily)	Very frequently (daily)	Moderate positive effect	Better assessments in terms of accuracy and distribution of taxa working on. It also gives a better academic value to the assessment if cited accordingly.	Slight negative impact	Slower assessments and with larger element of insecurity (estimate rather then accurate).	During my University research, the free institutuional account to get access to several scientific papers worked fine and I strongly suggest the IUCN workers and scientists would have a similar accademic environmnet for their research and redlist assessments.
4902968757												IUCN Secretariat staff		Bangladesh	Male	Very frequently (daily)		Easy		Essential			I prefer reading on a screen	I prefer the original hard copy		Yes	Very frequently (daily)	Sometimes (once a month)	Very frequently (daily)	Very frequently (daily)	Sometimes (once a month)	FrequentlyÂ (once a week)	Sometimes (once a month)	Very frequently (daily)
4902968634									IUCN SSC member					Indonesia	Male	Very frequently (daily)		Very easy		Essential		not relevant as I already have easy access	I prefer printingÂ out to read	I prefer reading on a screen		Yes	Never or not available	Never or not available	Very frequently (daily)	Infrequently	Infrequently	Never or not available	Infrequently	FrequentlyÂ (once a week)
4902968610													Suli group member	Germany	Male	Very frequently (daily)		Not easy	I have access through my University to some but not all journals.	Very important		The collection of journals under the Taylor and Francis scientific network.	I prefer reading on a screen			Yes	Sometimes (once a month)	Infrequently	Very frequently (daily)	Never or not available	FrequentlyÂ (once a week)	Infrequently	Sometimes (once a month)	FrequentlyÂ (once a week)
4902967881											IUCN WCPA member			Australia	Male	Never
4902967371									IUCN SSC member					Belgium	Male	Infrequently		Easy		Very important			I prefer printingÂ out to read	I prefer the original hard copy		Yes	Infrequently	Infrequently	Infrequently	Never or not available	Infrequently	Never or not available	Infrequently	Infrequently
4902964727									IUCN SSC member					Austria	Male	FrequentlyÂ (once a week)		Not easy	Since I am not formally affiliated with an University I have only limieted access to online libraries.	Essential			I prefer reading on a screen	I prefer reading on a screen		No	Never or not available	Infrequently	Never or not available	Infrequently	FrequentlyÂ (once a week)	Infrequently	Sometimes (once a month)	FrequentlyÂ (once a week)		Moderate positive effect		Moderate negative impact
4902964275									IUCN SSC member					South Africa	Male	Sometimes (once a month)		Not easy	Live far away from a main centre - no library access and not enough funds to purchase articles off the internet	Essential		Diversity & Distributions	I prefer printingÂ out to read	I prefer the original hard copy		No	Never or not available	Never or not available	Never or not available	Never or not available	FrequentlyÂ (once a week)	Never or not available	Infrequently	FrequentlyÂ (once a week)	Frequently (once a week)	Great positive effect		Moderate negative impact		It is very useful when the ISSG list-server brings to the attention of members very important papers and then provides a weblink where one can get gratis access to the article.
4902963922								IUCN CEM member				IUCN Secretariat staff		Thailand	Male	FrequentlyÂ (once a week)		Not easy	A number of the scientific research articles are not available for free and are housed on websites that require payment for these articles	Essential		Nature	I prefer reading on a screen	I prefer reading on a screen		No	Never or not available	Never or not available	Never or not available	Infrequently	Never or not available	Never or not available	Infrequently	FrequentlyÂ (once a week)	Very frequently (daily)	Great positive effect		Moderate negative impact
4902963159				IUCN National NGO Member										United States of America	Female	Sometimes (once a month)		Not easy		Very important			I prefer reading on a screen	I prefer the original hard copy		No	Never or not available	Never or not available	Never or not available	Never or not available	Infrequently	Sometimes (once a month)	Infrequently	Sometimes (once a month)	Frequently (once a week)	Great positive effect		Slight negative impact
4902962762						IUCN CEC member								Italy	Male	Very frequently (daily)		Easy		Essential		various	I prefer reading on a screen	I prefer the original hard copy		Yes	Sometimes (once a month)	Sometimes (once a month)	Very frequently (daily)	Never or not available	Infrequently	Never or not available	Infrequently	Infrequently						The on-line access to scientific literature is limited to open access journals or journals (or package of journals) for which my Institution has an on-line subscription,. Sometimes this limit can restrict substantially the access to scientific literature. In my opinion, IUCN should make feasible an unlimited access to all scientific sources connected with biodiversity monitoring and conservation …
4902962051												IUCN Secretariat staff		Switzerland	Female	Sometimes (once a month)		Easy		Somewhat important			I prefer printingÂ out to read	I prefer the original hard copy		No	Sometimes (once a month)	Never or not available	Infrequently	Infrequently	Never or not available	Sometimes (once a month)	Sometimes (once a month)	Sometimes (once a month)	Sometimes (once a month)	Moderate positive effect		Slight negative impact
4902962023									IUCN SSC member					India	Male	FrequentlyÂ (once a week)		Easy		Very important		Nature, Conservation Biology	I prefer reading on a screen	I prefer reading on a screen		Yes	Very frequently (daily)	Never or not available	Very frequently (daily)	Never or not available	FrequentlyÂ (once a week)	Never or not available	Sometimes (once a month)	Sometimes (once a month)						No
4902961501											IUCN WCPA member			South Africa	Male	FrequentlyÂ (once a week)
4902961209													Wildlife Health Specialist Group	United Kingdom of Great Britain and Northern Ireland	Male	FrequentlyÂ (once a week)		Not easy	I don't have journal access, but can fortunately use a friends university's access (although this is not strictly allowed of course)	Very important			I prefer reading on a screen	I prefer the original hard copy		No	Never or not available	Infrequently	Never or not available	Never or not available	Sometimes (once a month)	FrequentlyÂ (once a week)	Very frequently (daily)	Very frequently (daily)	Frequently (once a week)	Moderate positive effect		Moderate negative impact
4902960418									IUCN SSC member					Ireland	Male	Very frequently (daily)		Very easy	University access to e-journals	Essential		Journal of Herpetology	I prefer reading on a screen	I prefer the original hard copy		Yes	Infrequently	Never or not available	Very frequently (daily)	Never or not available	Infrequently	Infrequently	Sometimes (once a month)	Very frequently (daily)						Access to current and historical literature is paramount for an effective scientist and therefore having these resources available should be a top priority of the IUCN
4902960131			IUCN International NGO Member						IUCN SSC member					The Netherlands	Female	Infrequently		Very easy	I am at an University	Essential		Biological Conservation	I prefer printingÂ out to read	I prefer the original hard copy		Yes	Infrequently	Never or not available	Infrequently	Never or not available	Infrequently	Infrequently	Never or not available	Infrequently
4902959504												IUCN Secretariat staff		Thailand	Female	FrequentlyÂ (once a week)		Not easy	no access to most scientific literature as a IUCN staff	Very important	It is important that we keep up with the latest scientific knowledge so that we maintain our reputation as a science based organisation.	Conservation Letters, Journal of Applied Ecology, Forest Ecology & Management, Biodiversity and Conservation, Global Change Biology, Trends in Ecology & Evolution, Nature, Science, Plos One	I prefer printingÂ out to read	I prefer printingÂ out to read		No	Infrequently	Never or not available	Never or not available	Never or not available	Never or not available	Never or not available	FrequentlyÂ (once a week)	FrequentlyÂ (once a week)	Sometimes (once a month)	Great positive effect		Moderate negative impact
4902958918											IUCN WCPA member	IUCN Secretariat staff		Spain	Male	Very frequently (daily)		Not easy	difficult to access the most recent literature due to lack of subscription to journals and scientific databases, easily archivable pdf's etc.	Essential	I am developing and mobilising a science based marine conservation program. It is essential to access and publish in peer reviewed scientific journals	Conservation Letters	I prefer reading on a screen	I prefer the original hard copy		No	Infrequently	Never or not available	Never or not available	Infrequently	FrequentlyÂ (once a week)	Never or not available	Sometimes (once a month)	Very frequently (daily)	Very frequently (daily)	Great positive effect	IUCN presents itself as an evidence and science based conservation organisation. The work of the IUCN network (secretariat, commissions, etc) needs to be grounded in best practice and cutting edge science. This would allow projects undertaken to be relevant to a current global dialogue and be made available (through publishing in these same journals) to a global community of conservation scientis…	Great negative impact		I think that an online digital library to access would greatly enhance the work and mission of IUCN globally. If funds are an issue, then a percentage of all project and framework funding should be directed to funding this endeavour. I for one would be very supportive of this through the program / projects I develop and manage.
4902958690													IUCN Species Survival Commission	Lithuania	Male	Infrequently		Not easy	I am a university professor, my university has no subscription to some literature databases	Essential		Biological conservation	I prefer reading on a screen	I prefer reading on a screen		Yes	Very frequently (daily)	Never or not available	Very frequently (daily)	Never or not available	Infrequently	Never or not available	Infrequently	Very frequently (daily)						How can I subscribe to IUCN library?
4902958611												IUCN Secretariat staff		Switzerland	Female	Never
4902958466	IUCN State Member							IUCN CEM member	IUCN SSC member		IUCN WCPA member			Thailand	Male	Very frequently (daily)		Very easy	But only because I have my own library. It is astonishing to me that IUCN's regional office in Bangkok does not have a library, not even of just IUCN publications. I would gladly donate some of mine to them, but they seem to think this is not important. Fixing this problem would be very helpful for those of us working in Thailand.	Essential	That's why I subscribe to the key journals, and serve on the editorial board of 12 of them.	Journal of Conservation Biology (I subscribe, and would send my copy to the IUCN Library at the bangkok Regional Office, if they had a library.	I prefer the original hard copy	I prefer the original hard copy	But I also read on a screen, and print out the important ones, for example from PLoS	No	Never or not available	Never or not available	Never or not available	Never or not available	Infrequently	Very frequently (daily)	Sometimes (once a month)	FrequentlyÂ (once a week)	Very frequently (daily)	Great positive effect	in addition to the material I already receive through subscriptions (Nature, Science, J. Cons. Bill.) or because I am on the editorial board (e.g., Ambio, Oryx, etc.)	Slight negative impact		I hope that the Asia Regional Office in Bangkok can become a repository of IUCN publications, at a minimum, or become a regional library of conservation-related publications that would be open to university students, NGOs, members of IUCN Commissions, and IUCN Member organisations. This would be a very valuable contribution from IUCN to regional conservation.
4902958350									IUCN SSC member					United Kingdom of Great Britain and Northern Ireland	Female	Sometimes (once a month)
4902957597									IUCN SSC member					India	Male	Never
4902957068									IUCN SSC member					United Kingdom of Great Britain and Northern Ireland	Male	Infrequently		Not easy		Essential		Biological conservation	I prefer reading on a screen	I prefer the original hard copy		No	Never or not available	Never or not available	Never or not available	Never or not available	Infrequently	Sometimes (once a month)	Infrequently	Very frequently (daily)	Frequently (once a week)	Great positive effect		Moderate negative impact
4902955607	IUCN State Member													Mongolia	Male	Sometimes (once a month)
4902955105									IUCN SSC member					Germany	Male	Sometimes (once a month)		Easy		Very important		Journal of Biogeography	I prefer reading on a screen	I prefer the original hard copy		Yes	Infrequently	Never or not available	FrequentlyÂ (once a week)	Never or not available	Infrequently	Never or not available	Infrequently	FrequentlyÂ (once a week)
4902954543												IUCN Secretariat staff		Switzerland	Female	Infrequently		Not easy		Somewhat important			I prefer the original hard copy	I prefer the original hard copy		No	Never or not available	Never or not available	Never or not available	Never or not available	Never or not available	Never or not available	Sometimes (once a month)	Sometimes (once a month)	Sometimes (once a month)	Moderate positive effect		Slight negative impact
4902954038											IUCN WCPA member	IUCN Secretariat staff		Switzerland	Female	Sometimes (once a month)		Not easy	In the past whenever I requested an article from the library we did not have a subscription to the journal/book and it needed to be requested from other libraries which took time and cost money. I have therefore lost the habit of requesting and resort to what I can find for free online.	Somewhat important			I prefer printingÂ out to read	I prefer reading on a screen		No	Infrequently	Never or not available	Never or not available	Never or not available	Infrequently	Never or not available	Never or not available	Sometimes (once a month)	Sometimes (once a month)	Moderate positive effect		Slight negative impact
4902953477												IUCN Secretariat staff		Kenya	Male	Sometimes (once a month)		Not at all easy		Somewhat important			I prefer printingÂ out to read	I prefer the original hard copy		No	Never or not available	Never or not available	Never or not available	Never or not available	Never or not available	Never or not available	Infrequently	Sometimes (once a month)	Frequently (once a week)	Moderate positive effect		Slight negative impact
4902953422								IUCN CEM member				IUCN Secretariat staff		Pakistan	Male	FrequentlyÂ (once a week)		Not at all easy		Essential		Almost All	I prefer reading on a screen	I prefer the original hard copy		No	Sometimes (once a month)	Infrequently	Never or not available	Never or not available	Never or not available	Never or not available	Sometimes (once a month)	Very frequently (daily)	Very frequently (daily)	Great positive effect		Moderate negative impact
4902953025												IUCN Secretariat staff		South Africa	Female	Sometimes (once a month)
4902952809												IUCN Secretariat staff		Viet Nam	Female	Infrequently		Not easy		Essential			I prefer reading on a screen	I prefer the original hard copy		No	Infrequently	Sometimes (once a month)	Infrequently	Infrequently	Never or not available	Infrequently	Infrequently	Very frequently (daily)	Frequently (once a week)	Great positive effect		Moderate negative impact
4902952774									IUCN SSC member					United Kingdom of Great Britain and Northern Ireland	Male	FrequentlyÂ (once a week)		Very easy	Use a collegues University login details to access their online library	Essential			I prefer reading on a screen	I prefer the original hard copy		No	Never or not available	Never or not available	Never or not available	Never or not available	Sometimes (once a month)	Never or not available	FrequentlyÂ (once a week)	FrequentlyÂ (once a week)	Frequently (once a week)	Great positive effect		Slight negative impact	Have to rely on colleagues access rights
4902952463												IUCN Secretariat staff		Kenya	Male	Infrequently		Easy	Access through the IUCN portal	Very important	So that information put out to the public is correct and consistent with the organisation's ideals.		I prefer reading on a screen	I prefer reading on a screen		Yes	Infrequently	Never or not available	Infrequently	Infrequently	Infrequently	Infrequently	Infrequently	Infrequently
4902951614							IUCN CEESP member		IUCN SSC member					United Kingdom of Great Britain and Northern Ireland	Male	Very frequently (daily)		Very easy		Essential		conservation letters	I prefer reading on a screen	I prefer the original hard copy		Yes	Infrequently	Never or not available	FrequentlyÂ (once a week)	Never or not available	Never or not available	Never or not available	Never or not available	Very frequently (daily)
4902950894									IUCN SSC member					United States of America	Male	Sometimes (once a month)		Very easy		Not at all important			I prefer reading on a screen			Yes	FrequentlyÂ (once a week)	Never or not available	FrequentlyÂ (once a week)	Never or not available	Never or not available	FrequentlyÂ (once a week)	Sometimes (once a month)	FrequentlyÂ (once a week)
4902950794												IUCN Secretariat staff		Thailand	Female	FrequentlyÂ (once a week)		Easy	Somewhat easy	Somewhat important	Important	N/A	I prefer reading on a screen	I prefer reading on a screen		No	Infrequently	Never or not available	Infrequently	Never or not available	Infrequently	Never or not available	Infrequently	Very frequently (daily)	Infrequently	Slight positive effect		No impact at all
4902950527												IUCN Secretariat staff		Switzerland	Female	Very frequently (daily)
4902950388			IUCN International NGO Member											Hungary	Male	Infrequently		Easy	I write to the librarian, but would appreciate an electronic link to the IUCN library, as the CIC and its library is linked to many digital libraries.	Very important	For the CIC library	Science magazine	I prefer printingÂ out to read	I prefer the original hard copy		Yes	Infrequently	Infrequently	Infrequently	Infrequently	Infrequently	Infrequently	Sometimes (once a month)	Sometimes (once a month)						I would like to electronically link the IUCN and the CIC libraries
4902950160									IUCN SSC member					Australia	Female	FrequentlyÂ (once a week)		Easy	I am based at a University which has good electronic journal and other resource access...	Essential	To keep abreast of issues we must constantly update our knowledge through reading and reviewing literature.	Conservation Biology	I prefer reading on a screen	I prefer reading on a screen		Yes	FrequentlyÂ (once a week)	Sometimes (once a month)	Very frequently (daily)	Never or not available	Infrequently	Infrequently	Infrequently	Never or not available						Literature access is something that needs to be expanded not limited...
4902949919									IUCN SSC member					Japan	Male	Sometimes (once a month)		Easy		Somewhat important		Journal of Wildlife Diseases	I prefer reading on a screen	I prefer the original hard copy		Yes	FrequentlyÂ (once a week)	Infrequently	Very frequently (daily)	Never or not available	Infrequently	Sometimes (once a month)	Infrequently	Very frequently (daily)
4902949866												IUCN Secretariat staff		Switzerland	Male	Very frequently (daily)		Not easy	I myself have to join platforms, such as Research Gate, pay for the literature with program funds, or contact IUCN Library (who do a GREAT job at securing literature I need).	Essential	We 'claim' to be a scientific organization. I would like to know how many actual qualified science degrees there are in the organization, as I see a lot of very poor assumptions and subjective science being pushed within the organization.	Global Environmental Change	I prefer printingÂ out to read		not books.	No	Never or not available	Never or not available	Never or not available	FrequentlyÂ (once a week)	Infrequently	Sometimes (once a month)	Sometimes (once a month)	FrequentlyÂ (once a week)	Frequently (once a week)	Moderate positive effect	I like the way it works now with my requests to the IUCN librarian. The worry is that if there was a wider access to literature, those who spend all their time in their offices now doing academic reading, would do more. Not sure how useful that is for IUCN.	Great negative impact	we are not aware of new things coming out, the people working on them, we are late to the table on issues. Make us look like an amateur organization given we 'claim' to be a science based organization. Most of IUCN's science is grey and highly subjective literature.
4902949701			IUCN International NGO Member						IUCN SSC member					United Kingdom of Great Britain and Northern Ireland	Female	Very frequently (daily)		Very easy	I have access to two online libraries- my University (Stirling, Scotland) and the Wildlife Conservation Society (my employer)	Essential			I prefer reading on a screen	I prefer reading on a screen		Yes	FrequentlyÂ (once a week)	Never or not available	Very frequently (daily)	Never or not available	Infrequently	Infrequently	Infrequently	Very frequently (daily)
4902949664									IUCN SSC member					Cyprus	Male	Sometimes (once a month)		Not easy		Somewhat important		journal Avian Ecology, Ibis, Journal Applied Ecology	I prefer reading on a screen	I prefer the original hard copy		No	Never or not available	Never or not available	Never or not available	Never or not available	Sometimes (once a month)	Sometimes (once a month)	FrequentlyÂ (once a week)	FrequentlyÂ (once a week)	Sometimes (once a month)	Moderate positive effect		Moderate negative impact
4902949626									IUCN SSC member					United Kingdom of Great Britain and Northern Ireland	Male	Very frequently (daily)		Not easy	because of global placement of literature, that from many countries (especially in relation to tropics) is especially difficult to find	Essential	Needed as background for balanced discussion/presentation of multiple syntheses	multiple, but eg. Australian Journal of Botany	I prefer printingÂ out to read	I prefer the original hard copy	but for obscure material, any of these	Yes	Very frequently (daily)	FrequentlyÂ (once a week)	Very frequently (daily)	FrequentlyÂ (once a week)	Sometimes (once a month)	FrequentlyÂ (once a week)	FrequentlyÂ (once a week)	Very frequently (daily)						Regular access to published literature is vital if balanced presentations are to be assembled, especially on global-impact issues. It is important to pass-on in literature citings. Ideally, this should be available freely.
4902949333												IUCN Secretariat staff		United Kingdom of Great Britain and Northern Ireland	Female	FrequentlyÂ (once a week)		Easy	somewhere in between "not easy" and "easy". I have access to scientific literature due to the affiliation IUCN-UK office has with the University of Cambridge through the Cambridge Conservation Initiative. I am unsure if this is a permanent arrangement IUCN-UK can benefit from. Regardless, I think scientific literature should be made readily available through the IUCN's own channels.	Essential	it is essential in my line of work to support facts based on scientific studies and so the latest scientific literature is absolutely crucial.	there is no one journal	I prefer reading on a screen	I prefer reading on a screen		Yes	Never or not available	Never or not available	FrequentlyÂ (once a week)	Never or not available	Never or not available	Never or not available	Never or not available	FrequentlyÂ (once a week)
4902949103									IUCN SSC member					Italy	Male	FrequentlyÂ (once a week)		Very easy		Essential			I prefer reading on a screen	I prefer the original hard copy		Yes	FrequentlyÂ (once a week)	Never or not available	Very frequently (daily)	Sometimes (once a month)	Sometimes (once a month)	Infrequently	Infrequently	FrequentlyÂ (once a week)
4902949008		IUCN Government Agency Member									IUCN WCPA member			Norway	Male	Sometimes (once a month)		Easy		Very important			I prefer reading on a screen			Yes	Infrequently	Infrequently	Sometimes (once a month)	Infrequently	Infrequently	Sometimes (once a month)	Sometimes (once a month)	Sometimes (once a month)
4902948335									IUCN SSC member					United Kingdom of Great Britain and Northern Ireland	Male	Very frequently (daily)		Very easy	Through academic employment	Very important		Only one would not help - need a wide range	I prefer reading on a screen		Or sending to e-reader (print out if going on train or 'plane journeys)	Yes	Sometimes (once a month)	Never or not available	Very frequently (daily)	Never or not available	Sometimes (once a month)	Infrequently	Sometimes (once a month)	FrequentlyÂ (once a week)
4902947959									IUCN SSC member					Austria	Male	Infrequently		Very easy		Somewhat important		Conservation Biology	I prefer printingÂ out to read	I prefer the original hard copy		Yes	Never or not available	Infrequently	FrequentlyÂ (once a week)	Never or not available	Infrequently	Never or not available	Infrequently	Sometimes (once a month)
4902947909								IUCN CEM member						Germany	Female	FrequentlyÂ (once a week)		Not easy	Literature is not always available as public source, many of the interesting papers have to be purchased. 'grey' literature from organizations sometimes hard to find, e.g. not indexed.	Essential	Scientific literature is essential for writing papers and also for developing teaching materials, which is my core activity within IUCN-CEM.	Natural Hazards	I prefer reading on a screen	I prefer the original hard copy		Yes	Never or not available	Infrequently	Very frequently (daily)	Infrequently	Infrequently	Never or not available	FrequentlyÂ (once a week)	Very frequently (daily)						having an IUCN database would be great, thanks for the initiative
4902947629							IUCN CEESP member							Malaysia	Male	FrequentlyÂ (once a week)		Not easy		Essential		Marine Policy	I prefer printingÂ out to read	I prefer printingÂ out to read		Yes	Sometimes (once a month)	Infrequently	Sometimes (once a month)	Never or not available	Infrequently	Never or not available	Never or not available	Very frequently (daily)
4902947474									IUCN SSC member					United Kingdom of Great Britain and Northern Ireland	Male	Sometimes (once a month)		Very easy	have a huge pdf library	Essential		if you mean OA, then Zootaxa	I prefer reading on a screen	I prefer the original hard copy		Yes	Infrequently	Never or not available	Very frequently (daily)	Never or not available	FrequentlyÂ (once a week)	Never or not available	FrequentlyÂ (once a week)	Never or not available
4902923633				IUCN National NGO Member										Bosnia and Herzegovina	Male	FrequentlyÂ (once a week)		Easy		Essential	Arbor Magna is the scientific society	red lists	I prefer printingÂ out to read			Yes	Sometimes (once a month)	Infrequently	FrequentlyÂ (once a week)	Sometimes (once a month)	Sometimes (once a month)	Sometimes (once a month)	Sometimes (once a month)	Sometimes (once a month)
4902923182				IUCN National NGO Member										Bangladesh	Male	Very frequently (daily)		Easy		Very important			I prefer the original hard copy	I prefer reading on a screen		Yes	FrequentlyÂ (once a week)	FrequentlyÂ (once a week)	Sometimes (once a month)	Infrequently	Infrequently	FrequentlyÂ (once a week)	Infrequently	Very frequently (daily)						Can I be the individual member or access for IUCN Scientific literature?
4902890814				IUCN National NGO Member										Bangladesh	Male	Sometimes (once a month)		Not easy		Very important			I prefer reading on a screen	I prefer the original hard copy		Yes	FrequentlyÂ (once a week)	Infrequently	FrequentlyÂ (once a week)	Never or not available	FrequentlyÂ (once a week)	FrequentlyÂ (once a week)	FrequentlyÂ (once a week)	FrequentlyÂ (once a week)
4902889712				IUCN National NGO Member					IUCN SSC member		IUCN WCPA member			Jordan	Male	FrequentlyÂ (once a week)		Not easy		Essential		various journals of ecology, e.g. Applied Ecology	I prefer printingÂ out to read	I prefer the original hard copy		No	Sometimes (once a month)	Never or not available	Never or not available	Never or not available	Sometimes (once a month)	Infrequently	Infrequently	FrequentlyÂ (once a week)	Frequently (once a week)	Great positive effect		Moderate negative impact
4902881688			IUCN International NGO Member											Denmark	Male	FrequentlyÂ (once a week)
4902876804				IUCN National NGO Member					IUCN SSC member					Belgium	Male	Very frequently (daily)		Very easy		Very important			I prefer reading on a screen	I prefer the original hard copy		Yes	FrequentlyÂ (once a week)	Never or not available	Very frequently (daily)	Never or not available	Infrequently	Infrequently	Sometimes (once a month)	Sometimes (once a month)
4902867593				IUCN National NGO Member										Bosnia and Herzegovina	Female	FrequentlyÂ (once a week)		Easy		Very important			I prefer the original hard copy	I prefer the original hard copy		No	Sometimes (once a month)	FrequentlyÂ (once a week)	Never or not available	Infrequently	Infrequently	Infrequently	Sometimes (once a month)	FrequentlyÂ (once a week)	Frequently (once a week)	Slight positive effect		Slight negative impact
4902860302		IUCN Government Agency Member									IUCN WCPA member			Montenegro	Female	Sometimes (once a month)		Not easy		Very important	Because, it is easier to be informed about current situation in PAs regarding different issues, such are governance, ecosystem services, finance system in PAs, and it is much easier to have good arguments during better development of Management of PAs.	For now none	I prefer the original hard copy	I prefer the original hard copy		No	FrequentlyÂ (once a week)	Never or not available	Never or not available	Never or not available	Never or not available	Sometimes (once a month)	FrequentlyÂ (once a week)	Very frequently (daily)	Frequently (once a week)	Great positive effect	My work would have scientific importance based on scientific fact and it will be more consisted, more strait forward and exact.	Moderate negative impact	Since there are some facts that are accepted trough National policy it has moderate negative impact for a long term perspective.	It is very nice that you opening of this library. Hope that many mind will be open in order to save PAs for future generations.
4902834590				IUCN National NGO Member										Denmark	Male	Sometimes (once a month)		Not easy		Somewhat important		Nature	I prefer printingÂ out to read	I prefer printingÂ out to read		No	Never or not available	Infrequently	Infrequently	Never or not available	Infrequently	Never or not available	Sometimes (once a month)	FrequentlyÂ (once a week)	Frequently (once a week)	Moderate positive effect		Slight negative impact
4902815175	IUCN State Member													Kuwait	Male	Sometimes (once a month)
4902812181	IUCN State Member			IUCN National NGO Member										Bangladesh	Female	FrequentlyÂ (once a week)		Easy		Somewhat important		save white-rumped vulture from extinction	I prefer the original hard copy	I prefer the original hard copy		Yes	FrequentlyÂ (once a week)	Sometimes (once a month)	Sometimes (once a month)	Sometimes (once a month)	Infrequently	Sometimes (once a month)	Sometimes (once a month)	FrequentlyÂ (once a week)
4902796625				IUCN National NGO Member										Pakistan	Female	Sometimes (once a month)		Easy		Very important		Various	I prefer reading on a screen			No	Sometimes (once a month)	Infrequently	Sometimes (once a month)	Never or not available	Never or not available	Never or not available	Infrequently	FrequentlyÂ (once a week)	Frequently (once a week)	Great positive effect		Moderate negative impact
4902791980				IUCN National NGO Member										South Africa	Female	FrequentlyÂ (once a week)		Easy		Essential		Conservation Biology	I prefer reading on a screen	I prefer the original hard copy		Yes	Never or not available	Never or not available	Infrequently	Never or not available	Sometimes (once a month)	Infrequently	Infrequently	FrequentlyÂ (once a week)
4902788030				IUCN National NGO Member					IUCN SSC member				South Africa National Committee	South Africa	Female	FrequentlyÂ (once a week)		Easy		Essential		Conservation Biology	I prefer printingÂ out to read	I prefer the original hard copy		Yes	Never or not available	Never or not available	FrequentlyÂ (once a week)	Never or not available	FrequentlyÂ (once a week)	Never or not available	Sometimes (once a month)	Very frequently (daily)
4902787223				IUCN National NGO Member										Lebanon	Female	Infrequently		Easy		Somewhat important			I prefer reading on a screen	I prefer the original hard copy		Yes	Never or not available	Never or not available	Sometimes (once a month)	Never or not available	Infrequently	FrequentlyÂ (once a week)	FrequentlyÂ (once a week)	FrequentlyÂ (once a week)
4902746246		IUCN Government Agency Member												Pakistan	Male	Never
4902744352									IUCN SSC member					Pakistan	Male	Very frequently (daily)		Not easy		Somewhat important		Conservation Biology	I prefer reading on a screen	I prefer the original hard copy		Yes	FrequentlyÂ (once a week)	Infrequently	Very frequently (daily)	Infrequently	FrequentlyÂ (once a week)	Infrequently	Infrequently	Very frequently (daily)						No
4902717715													Other organization working relevant to IUCN work	Pakistan	Male	Sometimes (once a month)		Not easy		Somewhat important	As IUCN is working in the natural resources domain, so we need literature of that like water, forests, marine life etc.. so it's important to know about it.	Springer,	I prefer reading on a screen	I prefer reading on a screen		Yes	Sometimes (once a month)	Infrequently	Sometimes (once a month)	Never or not available	Infrequently	FrequentlyÂ (once a week)	Sometimes (once a month)	Very frequently (daily)
4902715796				IUCN National NGO Member										Pakistan	Male	Never
4902715237		IUCN Government Agency Member												Jordan	Male	Infrequently		Easy		Somewhat important			I prefer reading on a screen	I prefer printingÂ out to read		Yes	Infrequently	Infrequently	Sometimes (once a month)	Never or not available	Never or not available	Infrequently	Never or not available	Sometimes (once a month)						No
4902706361				IUCN National NGO Member										Ecuador	Female	FrequentlyÂ (once a week)		Easy		Very important		I already subscribe to several and the one I find most relevant to my work is Human Organization, published by the Society for Applied Anthropology, USA.	I prefer the original hard copy	I prefer the original hard copy		Yes	Never or not available	Never or not available	Sometimes (once a month)	Never or not available	Sometimes (once a month)	Very frequently (daily)	Sometimes (once a month)	Sometimes (once a month)
4902696747				IUCN National NGO Member										India	Male	FrequentlyÂ (once a week)		Easy		Very important		scientific review journals on environment and nrm	I prefer reading on a screen	I prefer the original hard copy		Yes	FrequentlyÂ (once a week)	Sometimes (once a month)	FrequentlyÂ (once a week)	Infrequently	Never or not available	Infrequently	Never or not available	Sometimes (once a month)						No
4902648987				IUCN National NGO Member										Bangladesh	Female	Infrequently		Not at all easy		Essential		Marine Eco system and river system	I prefer the original hard copy			No	Infrequently	Infrequently	Infrequently	Infrequently	Infrequently	Infrequently	Infrequently	FrequentlyÂ (once a week)	Frequently (once a week)	Great positive effect		No impact at all
4902583645				IUCN National NGO Member		IUCN CEC member		IUCN CEM member						Panama	Female	FrequentlyÂ (once a week)		Not at all easy	It is very difficult for NGOs to get the resources necessary to support their conservation work given the closed nature of academic publishing.	Essential		Springer	I prefer reading on a screen	I prefer reading on a screen		No	Sometimes (once a month)	Infrequently	FrequentlyÂ (once a week)	Never or not available	Infrequently	Never or not available	FrequentlyÂ (once a week)	Very frequently (daily)	Very frequently (daily)	Great positive effect		Great negative impact
4902527133									IUCN SSC member					United States of America	Female	Infrequently		Easy	I am currently affiliated with an institution that has a good library, therefore I have access. But this is not always the case.	Very important			I prefer reading on a screen	I prefer the original hard copy		Yes	Infrequently	Never or not available	Sometimes (once a month)	Never or not available	Infrequently	Never or not available	Infrequently	Sometimes (once a month)						The questions concerned current access. However one should also ask whether people have consistent access (i.e. over time).
4902436152	IUCN State Member		IUCN International NGO Member	IUCN National NGO Member			IUCN CEESP member				IUCN WCPA member			Palau	Male	Sometimes (once a month)		Not easy		Very important		marine and terrestrial conservation areas	I prefer printingÂ out to read			No	Sometimes (once a month)	Infrequently	Infrequently	Infrequently	Infrequently	Sometimes (once a month)	FrequentlyÂ (once a week)	FrequentlyÂ (once a week)	Sometimes (once a month)	Great positive effect		Slight negative impact
4902435776					IUCN Affiliate Member									United States of America	Female	FrequentlyÂ (once a week)		Not easy	In the past, I used by university affiliation (while a graduate student) to access scientific literature. Now that I have graduated from university, I no longer have access to the scientific literature I need.	Essential		Too many to list. Maybe Biotropica or Ecology.	I prefer reading on a screen	I prefer reading on a screen		No	Never or not available	Infrequently	Infrequently	Never or not available	Infrequently	Infrequently	Infrequently	FrequentlyÂ (once a week)	Sometimes (once a month)	Great positive effect		Moderate negative impact
4902429394			IUCN International NGO Member								IUCN WCPA member			Papua New Guinea	Male	FrequentlyÂ (once a week)		Not easy	Slow & limited internet	Very important		Science	I prefer reading on a screen	I prefer reading on a screen		Yes	Sometimes (once a month)	Never or not available	Infrequently	Infrequently	Infrequently	Infrequently	Sometimes (once a month)	FrequentlyÂ (once a week)
4902063876									IUCN SSC member					Colombia	Female	FrequentlyÂ (once a week)		Not at all easy		Essential			I prefer reading on a screen	I prefer the original hard copy		No	Never or not available	Never or not available	Never or not available	Never or not available	Very frequently (daily)	Never or not available	Very frequently (daily)	Very frequently (daily)
4901952679									IUCN SSC member					Botswana	Female	Sometimes (once a month)		Easy	I am a research associate at a university so can access it through them	Very important	Very important to keep up to date with scientific findings		I prefer printingÂ out to read	I prefer printingÂ out to read		Yes	Infrequently	Never or not available	Sometimes (once a month)	Never or not available	Infrequently	Never or not available	Never or not available	Never or not available
4901195020									IUCN SSC member					Germany	Female	Infrequently
4900641078						IUCN CEC member	IUCN CEESP member							Norway	Female	Never
4900554088				IUCN National NGO Member										Lao People's Democratic Republic	Male	Infrequently		Not easy		Somewhat important			I prefer reading on a screen	I prefer reading on a screen		Yes	Infrequently	Sometimes (once a month)	Infrequently	Infrequently	Infrequently	Infrequently	Infrequently	Infrequently						no comment
4900130804									IUCN SSC member				member of a IUCN Species Group	Russian Federation	Male	FrequentlyÂ (once a week)		Not easy		Essential			I prefer reading on a screen	I prefer reading on a screen		No	Infrequently	Infrequently	Infrequently	Never or not available	FrequentlyÂ (once a week)	Never or not available	Very frequently (daily)	Very frequently (daily)	Infrequently	Slight positive effect	Tne access is limited (for few journals and for few access modes)	Slight negative impact
4900059176									IUCN SSC member					Australia	Male	Infrequently		Not easy		Very important		PLOS One	I prefer printingÂ out to read	I prefer the original hard copy		No	Infrequently	Never or not available	Never or not available	Never or not available	Sometimes (once a month)	Never or not available	Sometimes (once a month)	FrequentlyÂ (once a week)	Sometimes (once a month)	Moderate positive effect		Moderate negative impact
4899334762			IUCN International NGO Member											Nepal	Male	Sometimes (once a month)		Easy		Somewhat important		Related to Climate Changes, Energy and Natural Resource Management	I prefer reading on a screen			No	Infrequently	Infrequently	Sometimes (once a month)	Infrequently	Never or not available	Infrequently	Infrequently	Infrequently	Infrequently	Moderate positive effect		Slight negative impact
4899286046				IUCN National NGO Member										Ecuador	Female	Sometimes (once a month)
4898831250									IUCN SSC member					Belgium	Male	Sometimes (once a month)		Very easy		Essential			I prefer reading on a screen	I prefer the original hard copy		Yes	Infrequently	Never or not available	Very frequently (daily)	Never or not available	FrequentlyÂ (once a week)	FrequentlyÂ (once a week)	FrequentlyÂ (once a week)	FrequentlyÂ (once a week)
4898742141												IUCN Secretariat staff		Switzerland	Female	Very frequently (daily)		Easy		Essential		Nature Climate Change	I prefer printingÂ out to read	I prefer the original hard copy		No	Never or not available	Never or not available	Very frequently (daily)	Infrequently	Infrequently	Never or not available	Very frequently (daily)	Very frequently (daily)	Very frequently (daily)	Great positive effect		Great negative impact
4898574483									IUCN SSC member					Norway	Male	Very frequently (daily)		Very easy		Essential		Biological Conservation	I prefer printingÂ out to read	I prefer the original hard copy		Yes	Infrequently	Never or not available	Very frequently (daily)	Never or not available	Sometimes (once a month)	Never or not available	Infrequently	Very frequently (daily)						Although I have easy access to journals (based in Norway) I work a lot in developing countries and understand that my colleagues have major problems accessing journals - to the extent that it is hard to teach them a culture of even looking for information. ResearchGate is a very important resource that your survey does not ask about.
4898488549												IUCN Secretariat staff		Switzerland	Male	Sometimes (once a month)		Easy		Somewhat important			I prefer reading on a screen	I prefer reading on a screen		No	Sometimes (once a month)	Never or not available	Infrequently	Sometimes (once a month)	Never or not available	Never or not available	Infrequently	Infrequently	Sometimes (once a month)	Slight positive effect		Moderate negative impact
4898434846												IUCN Secretariat staff		Switzerland	Male	FrequentlyÂ (once a week)		Not easy		Somewhat important			I prefer reading on a screen	I prefer printingÂ out to read		No	Infrequently	Infrequently	Sometimes (once a month)	Sometimes (once a month)	Sometimes (once a month)	Never or not available	Infrequently	Infrequently	Frequently (once a week)	Moderate positive effect		Moderate negative impact
4897960702											IUCN WCPA member			Australia	Male	Sometimes (once a month)		Not easy	I was unaware of the IUCN Library. Am a recent member of WCPA. I usually use the facilities of the University of Tasmania where I am carrying out post-graduate research.	Very important		Can't answer that question.	I prefer the original hard copy	I prefer the original hard copy		Yes	FrequentlyÂ (once a week)	Never or not available	FrequentlyÂ (once a week)	Never or not available	Infrequently	Never or not available	Never or not available	FrequentlyÂ (once a week)
4897498684	IUCN State Member												IUCN National Focal Point	Belgium	Female	Infrequently		Easy		Very important		Science; Nature; PLOS; PNAS; Conservation Letters; Conservation Biology; Biological Conservation; Biodiversity & Conservation	I prefer reading on a screen	I prefer reading on a screen		Yes	Never or not available	Never or not available	FrequentlyÂ (once a week)	Infrequently	Sometimes (once a month)	Never or not available	Never or not available	FrequentlyÂ (once a week)
4897490926								IUCN CEM member						The Netherlands	Male	Sometimes (once a month)		Easy		Essential		many ecological magazines	I prefer reading on a screen	I prefer the original hard copy		Yes	FrequentlyÂ (once a week)	Infrequently	Very frequently (daily)	FrequentlyÂ (once a week)	Sometimes (once a month)	Never or not available	Infrequently	Very frequently (daily)
4897370628									IUCN SSC member					The Netherlands	Male	FrequentlyÂ (once a week)		Not easy	I am self-employed and do not have access to literature sources that have to be paid for	Very important	I am publishing on species(groups) for which I am member of the SSC network	not one specifically	I prefer printingÂ out to read	I prefer the original hard copy		No	Never or not available	Infrequently	Never or not available	Never or not available	Sometimes (once a month)	FrequentlyÂ (once a week)	Sometimes (once a month)	FrequentlyÂ (once a week)	Frequently (once a week)	Moderate positive effect		Slight negative impact
4897341335									IUCN SSC member					Australia	Male	FrequentlyÂ (once a week)		Not at all easy	I do not belong to a scientific or academic institution, so unless I can find it for free online I have to get other people to supply it to me	Essential	I have just recently become a Red List assessor	many	I prefer printingÂ out to read	I prefer the original hard copy		No	Never or not available	Never or not available	Never or not available	Never or not available	Infrequently	Never or not available	Infrequently	Sometimes (once a month)	Sometimes (once a month)	Moderate positive effect		Slight negative impact		as a newly appointed red list assessor it would be fantastic if I could get access to GIS software
4897245785									IUCN SSC member					Australia	Female	Very frequently (daily)		Very easy		Essential		too many to mention	I prefer printingÂ out to read	I prefer the original hard copy		Yes	Sometimes (once a month)	Never or not available	Very frequently (daily)	Never or not available	Infrequently	Infrequently	Infrequently	Sometimes (once a month)						I have long hard copy runs of several conservation relevant journsl that i wudl love to give to an instutin in a developing country if I coudl work out an appropriate recipient and how to get them there cost-effecitvely.
4896820343			IUCN International NGO Member											Tanzania (United Republic of)	Male	Infrequently		Easy		Somewhat important		Parks	I prefer the original hard copy	I prefer the original hard copy		No	Infrequently	Never or not available	Never or not available	Never or not available	Infrequently	Never or not available	Sometimes (once a month)	Sometimes (once a month)	Sometimes (once a month)	Moderate positive effect		Slight negative impact		It will be good if IUCN could scan its old publications which are not easily accessible.
4896498438				IUCN National NGO Member										Lebanon	Female	Very frequently (daily)		Easy		Very important		marine biodiversity and red lists	I prefer reading on a screen	I prefer reading on a screen		Yes	Infrequently	Infrequently	Sometimes (once a month)	Never or not available	Never or not available	Infrequently	Sometimes (once a month)	Very frequently (daily)						none
4896134861									IUCN SSC member					CÃ´te d'Ivoire	Male	FrequentlyÂ (once a week)		Easy	I maintain library access through my former university. If i did not have this, it would be significantly harder.	Essential		There is not just one.	I prefer reading on a screen	I prefer the original hard copy		Yes	FrequentlyÂ (once a week)	Never or not available	FrequentlyÂ (once a week)	Never or not available	Infrequently	Never or not available	Infrequently	FrequentlyÂ (once a week)
4895053466									IUCN SSC member		IUCN WCPA member			Bulgaria	Male	Sometimes (once a month)		Easy	There is a lot of opportunities to get the needed literature from free sites...	Very important			I prefer reading on a screen	I prefer reading on a screen	I prefer to print some important books which I use regularly	No	Never or not available	Never or not available	Never or not available	Never or not available	Sometimes (once a month)	Never or not available	Never or not available	FrequentlyÂ (once a week)	Sometimes (once a month)	Slight positive effect	You could find almost everything for free in the Internet	Slight negative impact
4894840644									IUCN SSC member					Hungary	Male	FrequentlyÂ (once a week)		Not easy	In Hungary at the university ELTE where I am doing my PhD on reintroductions we have full text access only to about 1/3 of the scientific literature.	Essential		Conservation Biology	I prefer printingÂ out to read	I prefer the original hard copy		Yes	Infrequently	Never or not available	FrequentlyÂ (once a week)	Never or not available	FrequentlyÂ (once a week)	Infrequently	Infrequently	FrequentlyÂ (once a week)						I am working on compiling a database where I wouldm like to collect the majority of the literature on animal reintroductions. Therefore access to scientific literature is essential for me. I would be happy to collaborate with the IUCN HQ Library on this project. See details in our Oryx paper: Bajomi, B., Pullin, A.S., Stewart, G.B., TakÃ¡cs-SÃ¡nta, A., 2010. Bias and dispersal in the animal reint…
4894536819									IUCN SSC member					Cambodia	Female	FrequentlyÂ (once a week)		Not easy	I don't have access to many scientific journals	Very important			I prefer reading on a screen			Yes	Infrequently	Never or not available	Sometimes (once a month)	Never or not available	Infrequently	Never or not available	Infrequently	FrequentlyÂ (once a week)
4894263366											IUCN WCPA member			Australia	Male	Sometimes (once a month)		Easy	access to journals through university	Very important		varies	I prefer printingÂ out to read	I prefer the original hard copy		Yes	Infrequently	Never or not available	Sometimes (once a month)	Never or not available	Infrequently	Never or not available	Never or not available	FrequentlyÂ (once a week)
4892337296						IUCN CEC member								Nigeria	Male	Very frequently (daily)		Not easy	Cost and challenges of payment system	Very important	To promotes dynamism		I prefer printingÂ out to read	I prefer reading on a screen		No	Sometimes (once a month)	Sometimes (once a month)	Infrequently	Never or not available	Infrequently	Never or not available	Infrequently	FrequentlyÂ (once a week)	Frequently (once a week)	Great positive effect	Support evidence based research /project	Slight negative impact		No
4892324807									IUCN SSC member					Mongolia	Female	Sometimes (once a month)		Not easy		Very important		Entomology, Zoology	I prefer reading on a screen	I prefer the original hard copy		No	Infrequently	Never or not available	Sometimes (once a month)	Never or not available	Sometimes (once a month)	FrequentlyÂ (once a week)	FrequentlyÂ (once a week)	Very frequently (daily)	Frequently (once a week)	Moderate positive effect		Moderate negative impact
4892324039											IUCN WCPA member			Philippines	Female	FrequentlyÂ (once a week)		Easy	it is somewhere between easy and not easy. I mainly access scientific literature online and there are a lot out there but I am not always sure about how "scientific" the literature are.	Essential	It is essential because my work involves technical and socio-cultural research and mapping.		I prefer the original hard copy	I prefer the original hard copy		No	Never or not available	Infrequently	Never or not available	Never or not available	Never or not available	Never or not available	Infrequently	Very frequently (daily)	Very frequently (daily)	Great positive effect		Moderate negative impact
4892224467											IUCN WCPA member			South Africa	Male	FrequentlyÂ (once a week)		Not at all easy		Somewhat important		proteted areas, climate	I prefer printingÂ out to read			No	Never or not available	Never or not available	Infrequently	Never or not available	Infrequently	Infrequently	Sometimes (once a month)	Sometimes (once a month)	Sometimes (once a month)	Moderate positive effect		Slight negative impact
4891910364									IUCN SSC member					Australia	Male	Sometimes (once a month)		Easy	my workplace provides library access, including online access to most important conservation journals	Very important			I prefer reading on a screen	I prefer the original hard copy		Yes	FrequentlyÂ (once a week)	Never or not available	FrequentlyÂ (once a week)	Never or not available	Sometimes (once a month)	Sometimes (once a month)	Infrequently	Sometimes (once a month)
4890995921				IUCN National NGO Member										Brazil	Female	FrequentlyÂ (once a week)		Easy		Very important			I prefer reading on a screen	I prefer the original hard copy		Yes	FrequentlyÂ (once a week)	Sometimes (once a month)	Very frequently (daily)	Infrequently	Infrequently	FrequentlyÂ (once a week)	Never or not available	FrequentlyÂ (once a week)						No
4890655950			IUCN International NGO Member				IUCN CEESP member				IUCN WCPA member			Barbados	Male	Sometimes (once a month)		Easy		Somewhat important		Ocean and Coastal Management	I prefer reading on a screen	I prefer reading on a screen		Yes	Never or not available	Never or not available	Sometimes (once a month)	Never or not available	Infrequently	Never or not available	Never or not available	Sometimes (once a month)						no
4890578495												IUCN Secretariat staff		United Kingdom of Great Britain and Northern Ireland	Female	Infrequently		Easy		Not at all important			I prefer reading on a screen	I prefer reading on a screen		Yes	Infrequently	Never or not available	Never or not available	Never or not available	Never or not available	Never or not available	Never or not available	Sometimes (once a month)						Hi Daisy, Matea here from the WH Programme. I don't handle scientific literature in my day to day job but my colleagues certainly do, and our recent Knowledge Management Strategy identified a need to consolidate our scientific literature knowledge base (at the abstract level at least) via a central electronic literature repository/database. My initial thoughts are that we could use something like…
4890255469							IUCN CEESP member	IUCN CEM member						Sweden	Male	FrequentlyÂ (once a week)
4888948446							IUCN CEESP member		IUCN SSC member					United States of America	Male	FrequentlyÂ (once a week)		Not easy		Essential		what a silly question a huge range is needed	I prefer reading on a screen	I prefer reading on a screen		No	Very frequently (daily)	Sometimes (once a month)	Never or not available	Never or not available	Infrequently	Never or not available	Infrequently	Sometimes (once a month)	Frequently (once a week)	Great positive effect		Moderate negative impact
4888942889									IUCN SSC member					United States of America	Male	Sometimes (once a month)		Not easy	many online journals are not accessible	Very important		Nature	I prefer the original hard copy	I prefer the original hard copy		No	Never or not available	Infrequently	Never or not available	Never or not available	Infrequently	FrequentlyÂ (once a week)	Infrequently	Sometimes (once a month)	Sometimes (once a month)	Moderate positive effect		Moderate negative impact
4887617431									IUCN SSC member					United Kingdom of Great Britain and Northern Ireland	Female	Never
4887500924													Non-Departmental Body of the Scottish Government	United Kingdom of Great Britain and Northern Ireland	Male	FrequentlyÂ (once a week)		Easy	As a Librarian I access IUCN Conference Proceedings via the internet to satisfy inter library requests from staff members.	Essential	Scottish Natural Heritage is an agency that uses scientific evidence in its' environmental decision making process.	Current requests have been for conference proceedings but open access to scientific journals increaese productivity of independent searches.	I prefer printingÂ out to read	I prefer printingÂ out to read	This is my preference but I am the acting on behalf of readers.	Yes	Very frequently (daily)	Infrequently	FrequentlyÂ (once a week)	Never or not available	Never or not available	Never or not available	Sometimes (once a month)	Sometimes (once a month)						Could you send information about the IUCN Library Services that are freely available to staff of a Non-Departmental Body in the UK. Also what Library services do you offer to other libraries?
4887431516									IUCN SSC member		IUCN WCPA member			United Kingdom of Great Britain and Northern Ireland	Male	FrequentlyÂ (once a week)		Not easy	Do not have access to most journals through e.g. an academic library route.	Somewhat important		Biological Conservation	I prefer printingÂ out to read	I prefer the original hard copy		No	Never or not available	Never or not available	Never or not available	Never or not available	Sometimes (once a month)	Never or not available	Infrequently	FrequentlyÂ (once a week)	Sometimes (once a month)	Great positive effect		Moderate negative impact		I was not aware (until reading the intro to this survey) that IUCN Commission members have access to journals through IUCN Library; nor do I know how to request such access.
4887430183													IUCN temporary position	Switzerland	Female	FrequentlyÂ (once a week)		Not easy	Not free access to relevant and current scientific litterature	Very important		Cultural Geographiesâ€”published by Sage Publications	I prefer printingÂ out to read	I prefer the original hard copy		No	Sometimes (once a month)	Infrequently	FrequentlyÂ (once a week)	Infrequently	Infrequently	Sometimes (once a month)	FrequentlyÂ (once a week)	Very frequently (daily)	Infrequently	Great positive effect		Moderate negative impact
4887392000							IUCN CEESP member							Bangladesh	Male	Never
4887309668									IUCN SSC member					Bulgaria	Female	FrequentlyÂ (once a week)		Not easy		Essential			I prefer reading on a screen	I prefer the original hard copy		Yes	Infrequently	Infrequently	FrequentlyÂ (once a week)	Never or not available	Sometimes (once a month)	Never or not available	FrequentlyÂ (once a week)	Very frequently (daily)
4886679635			IUCN International NGO Member					IUCN CEM member						United States of America	Male	Sometimes (once a month)		Not easy	cannot always take advantage of university-based subsriptions and databases; while online access to open-access literature is improving, the number of relevant journals is also expanding...	Very important		too difficult to narrow to one	I prefer printingÂ out to read	I prefer the original hard copy		No	FrequentlyÂ (once a week)	Infrequently	Sometimes (once a month)	Never or not available	Infrequently	FrequentlyÂ (once a week)	Sometimes (once a month)	Very frequently (daily)	Frequently (once a week)	Moderate positive effect		Slight negative impact
4886219855		IUCN Government Agency Member							IUCN SSC member					Namibia	Male	FrequentlyÂ (once a week)		Not at all easy	Access is too expensive	Very important		The Ostrich	I prefer printingÂ out to read	I prefer printingÂ out to read		No	Infrequently	Infrequently	Never or not available	Never or not available	Infrequently	Never or not available	Never or not available	FrequentlyÂ (once a week)	Frequently (once a week)	Moderate positive effect		Slight negative impact
4885692363		IUCN Government Agency Member							IUCN SSC member					Portugal	Female	FrequentlyÂ (once a week)		Not easy		Essential		Biological conservation	I prefer printingÂ out to read	I prefer the original hard copy		Yes	Never or not available	Sometimes (once a month)	Sometimes (once a month)	Never or not available	Sometimes (once a month)	Never or not available	FrequentlyÂ (once a week)	FrequentlyÂ (once a week)						I only have temporary access to scientific literature because besides my job I am doing a PhD
4885654723											IUCN WCPA member			Sweden	Male	FrequentlyÂ (once a week)		Easy		Essential		Journal of Sustainable Tourism	I prefer reading on a screen	I prefer reading on a screen		Yes	Infrequently	Infrequently	FrequentlyÂ (once a week)	Never or not available	Infrequently	Never or not available	Infrequently	Sometimes (once a month)
4885601596											IUCN WCPA member			France	Female	Very frequently (daily)		Easy		Essential		Science	I prefer reading on a screen	I prefer the original hard copy		No	Sometimes (once a month)	Infrequently	Never or not available	Never or not available	Never or not available	Very frequently (daily)	Sometimes (once a month)	Very frequently (daily)	Very frequently (daily)	Great positive effect		Moderate negative impact
4885373834									IUCN SSC member					Seychelles	Male	Sometimes (once a month)		Not easy	We have no institutional access to standard journals so have to rely on asking authors for personal copies	Somewhat important	My work with IUCN is under one of the SCCs and I am generally able to get the papers I need through my contacts or from the authors directly.	MArine Ecology progress Series	I prefer printingÂ out to read	I prefer printingÂ out to read		No	Never or not available	Infrequently	Never or not available	Never or not available	Sometimes (once a month)	Never or not available	Infrequently	Sometimes (once a month)	Sometimes (once a month)	Slight positive effect	Limited as my work is only through SCC	No impact at all	I can get most of the articles I need through my contacts or from the authors.
4885340239									IUCN SSC member					Poland	Female	Infrequently		Easy		Somewhat important		WAZA Magazine and WAZA News	I prefer reading on a screen	I prefer reading on a screen		No	Infrequently	Never or not available	Never or not available	Sometimes (once a month)	Infrequently	Never or not available	Infrequently	FrequentlyÂ (once a week)	Frequently (once a week)	Slight positive effect		No impact at all
4885330273												IUCN Secretariat staff		Spain	Female	Very frequently (daily)		Easy	Easy to obtain open publications or papers available on the web	Essential	Because most of my work is related to Red List assessments which require to consult and cite all sound scientific data regarding species of many different groups	There is no single journal as I need to consult many different publications	I prefer reading on a screen	I prefer reading on a screen		No	Never or not available	Never or not available	Never or not available	Never or not available	Infrequently	Never or not available	Sometimes (once a month)	Very frequently (daily)	Very frequently (daily)	Great positive effect	it will allow me to produce better quality Red List assessments as well as other type of reports	Slight negative impact	Sometime I can spend a lot of time searching for publications online that I can access
4885243171							IUCN CEESP member							Germany	Female	Sometimes (once a month)		Very easy		Essential		Environmental Science & Policy	I prefer printingÂ out to read	I prefer the original hard copy		Yes	Infrequently	Never or not available	Very frequently (daily)	Never or not available	Infrequently	Never or not available	Infrequently	Sometimes (once a month)
4885215057				IUCN National NGO Member										Kenya	Female	FrequentlyÂ (once a week)		Easy		Essential			I prefer printingÂ out to read	I prefer the original hard copy		No	Infrequently	Never or not available	Infrequently	Infrequently	Infrequently	Sometimes (once a month)	Sometimes (once a month)	Very frequently (daily)	Frequently (once a week)	Moderate positive effect		Moderate negative impact
4885210599									IUCN SSC member					United Kingdom of Great Britain and Northern Ireland	Male	FrequentlyÂ (once a week)		Easy		Very important			I prefer printingÂ out to read			Yes	Never or not available	Never or not available	FrequentlyÂ (once a week)	Never or not available	Sometimes (once a month)	Never or not available	Infrequently	FrequentlyÂ (once a week)
4885173811									IUCN SSC member		IUCN WCPA member			India	Male	Sometimes (once a month)		Very easy		Very important		Biological Conservation	I prefer reading on a screen	I prefer the original hard copy		Yes	Very frequently (daily)	FrequentlyÂ (once a week)	FrequentlyÂ (once a week)	Sometimes (once a month)	FrequentlyÂ (once a week)	FrequentlyÂ (once a week)	Sometimes (once a month)	Very frequently (daily)						Excellent Bibliographic Platform
4885166330								IUCN CEM member						Germany	Male	Very frequently (daily)		Easy	Through my organization, I have access to scientific literature, but not all of it. I often times have to ask some of my students to get papers for me through their own University libraries.	Essential	I work in research and access to all scientific publications is essential	Any relevant Springer journals.	I prefer reading on a screen	I prefer the original hard copy		Yes	Never or not available	Never or not available	Very frequently (daily)	Never or not available	Sometimes (once a month)	Sometimes (once a month)	FrequentlyÂ (once a week)	Very frequently (daily)
4884939861									IUCN SSC member					United States of America	Male	FrequentlyÂ (once a week)		Very easy	I am not in academia but have a university-affiliated employer, which gives me access to the university library subscriptions.	Essential	Seems self-explanatory? Need papers on ecology, distribution, taxonomy, etc.		I prefer reading on a screen	I prefer the original hard copy		Yes	Never or not available	Infrequently	Very frequently (daily)	Never or not available	Infrequently	Never or not available	Infrequently	FrequentlyÂ (once a week)
4884763133									IUCN SSC member					United States of America	Male	FrequentlyÂ (once a week)		Not easy		Very important			I prefer reading on a screen	I prefer the original hard copy		No	Infrequently	Never or not available	Infrequently	Never or not available	Infrequently	Never or not available	Infrequently	Infrequently	Frequently (once a week)	Great positive effect		Slight negative impact
4884337173										IUCN WCEL member				China	Male	FrequentlyÂ (once a week)		Not easy		Very important			I prefer reading on a screen	I prefer reading on a screen		Yes	FrequentlyÂ (once a week)	Never or not available	Never or not available	Never or not available	Never or not available	Never or not available	Never or not available	Never or not available
4884296280		IUCN Government Agency Member		IUCN National NGO Member										Egypt	Male	FrequentlyÂ (once a week)		Easy		Very important		PARKS	I prefer printingÂ out to read			No	Never or not available	Infrequently	Sometimes (once a month)	Infrequently	Sometimes (once a month)	Infrequently	Infrequently	Infrequently	Sometimes (once a month)	Great positive effect		Great negative impact		no
4883965689									IUCN SSC member					United States of America	Male	Sometimes (once a month)		Very easy		Essential			I prefer reading on a screen	I prefer reading on a screen		Yes	Infrequently	Never or not available	Sometimes (once a month)	Never or not available	Never or not available	Never or not available	Never or not available	Sometimes (once a month)
4883958870									IUCN SSC member					Australia	Male	Sometimes (once a month)		Not easy	As a small non profit HGO we don't have the resources to pay for subscriptions to a lot of scientific journals. We utilize our contacts to help source literature sometimes, but this is not an ideal situation.	Somewhat important	Access to scientific literature helps when we are writing articles, searching for data etc., but this is not a major component of our work.	Conservation Biology	I prefer reading on a screen	I prefer reading on a screen		No	Never or not available	Infrequently	Never or not available	Never or not available	Infrequently	Infrequently	Sometimes (once a month)	FrequentlyÂ (once a week)	Sometimes (once a month)	Moderate positive effect	It would certainly provide data to support our work and to help guide us in future conservation work.	Slight negative impact
4883766326				IUCN National NGO Member			IUCN CEESP member		IUCN SSC member					Canada	Male	Infrequently		Easy		Very important		International Forestry Review	I prefer printingÂ out to read	I prefer the original hard copy		Yes	Sometimes (once a month)	Never or not available	FrequentlyÂ (once a week)	Never or not available	Never or not available	Infrequently	Never or not available	Sometimes (once a month)						No
4883588780				IUCN National NGO Member										Malawi	Male	Sometimes (once a month)		Not at all easy		Somewhat important			I prefer reading on a screen			No	Never or not available	Never or not available	Never or not available	Never or not available	Never or not available	Never or not available	Sometimes (once a month)	Sometimes (once a month)	Frequently (once a week)	Great positive effect		Slight negative impact
4883543490									IUCN SSC member				Caprine specialist group		Male	FrequentlyÂ (once a week)		Not easy	Translation of literature is s problem. Much of the literature is in Russian.	Essential		Begin providing translations of central Asian & Russian reports and journal articles not available in English	I prefer printingÂ out to read	I prefer printingÂ out to read	Actually read in all three formats. But paper copies are easier for me to refind referenced information.	Yes	FrequentlyÂ (once a week)	Sometimes (once a month)	Very frequently (daily)	Infrequently	Sometimes (once a month)	Sometimes (once a month)	Infrequently	Very frequently (daily)
[truncated: 1,124 more rows]

## Sheet: ES
IdentificaciÃ³n del encuestado	Â¿A cuÃ¡l de los componentes de la UICN pertenece usted? Marque todo lo que corresponda.													Â¿En quÃ© paÃ­s / territorio estÃ¡ usted ubicado?	GÃ©nero	Â¿Con quÃ© frecuencia debe consultar literatura cientÃ­fica para llevar a cabo su trabajo relacionado con la UICN?		Â¿CuÃ¡n fÃ¡cil es para usted obtener la literatura cientÃ­fica que necesita para llevar a cabo su trabajo relacionado con la UICN?		Â¿QuÃ© importancia tiene el acceder fÃ¡cilmenteÂ la literatura cientÃ­fica para su trabajo con la UICN?		En general, Â¿con quÃ© frecuencia el empleado termina su trabajo en las fechas programadas de entrega?	Â¿En quÃ© formato prefiere leer literatura cientÃ­fica?			Â¿Tiene usted acceso institucional a literatura cientÃ­fica en lÃ­nea (por ejemplo a travÃ©s de su afiliaciÃ³n aÂ una universidad u otra organizaciÃ³n)?	Â¿Con quÃ© frecuencia utiliza usted los siguientes medios para tener acceso a la literatura cientÃ­fica en su trabajo relacionado con la UICN?								Si tuviera acceso institucional a literatura cientÃ­fica en lÃ­nea, con quÃ© frecuencia la utilizarÃ­a para su trabajo con la UICN?	Â¿QuÃ© efecto tendrÃ­a el acceso institucional a literatura cientÃ­fica en lÃ­nea sobre la calidad de su trabajo con la UICN?		Â¿QuÃ© impacto tiene la falta de acceso institucional a literatura cientÃ­fica en lÃ­nea sobre su trabajo con la UICN?		Â¿Tiene algÃºn otro comentario, preguntas o sugerencias?
[truncated: 170 more rows]

[truncated: 1 more sheets: FR]
