# Supplementary material for: Access to scientific literature by the conservation community
Source: PeerJ. 2020 Jul 9;8:e9404. doi: 10.7717/peerj.9404 (PMC7354838; doi:10.7717/peerj.9404)
Supplement: Supplemental Information 7 [file peerj-08-9404-s007.xlsx]

## Sheet: Raw data
		59.95	130.88	3.18	58.82	6	1	3.5	4	4.2	42.68	15.86	3.33	4.53	9.53	6.45	29.53	11.48	1	3	1.75	21.96	1.33	13.58	1	1	1.25	2	2	1.58	1	3	6.25	3	0.25	6.58	2	3.16	1	1	4	4.88	9.47	14.08	1	1	2	1	1
444		Nature	Conservation Biology	Trends in Ecology and Evolution	Biological Conservation	Chelonian Conservation and Biology	Ecotoxicology	ICES Journal of Marine Science	Journal of Fish Biology	Copeia	Science	Journal of Wildlife Management	Biological Invasions	Conservation Genetics	Molecular Ecology	Journal of Mammology	Zootaxa	Ecology	Philosophical Transactions of the Royal Society B	Mammal Review	Coral Reefs	Oryx	Conservation	Parks	Subterranean Biology	Journal of Education for Sustainable Development	Journal of Cetacean Research and Management	Environmental Policy and Law	Herpetological Journal	Endangered Species Research	Journal of Wilderness Management	Environmental Education Research	Marine Ecology Progress Series	Journal of Conchology	Methods in Ecology and Evolution	Conservation Letters	Environmental Impact Assessment Review	Nature Climate Change	International Journal of Environmental and Science Education	Wetlands Ecology and Management	Journal for Nature Conservation	Ibis	PLoS ONE	Biodiversity and Conservation	Evolution	Academy of Environmental Law	Environmental Management	Journal of Forest Management	Kew Bulletin
0	-
0	live science journal -- http://www.livescience.com/
0	(only one? all forest related journals!)
1	1- International Journal of Environment and Sustainable Development. 2- International Journal of Sustainable Development
0	A diversified sample of credible scientif journals, rather than a single one.
0	a lot of them.
0	A range of journals covering biological information of species
0	about Conservation of turtles en tortoises
0	about tomistoma conservation
0	Absurd question - we need access to 100s
0	Academia .edu
0	Accelerated modern human–induced species losses
0	Access to a sigle journal would not help, as serious scientific work requires access to as many journals as possible.
1	Adansonia
1	african journal of ecology
1	African Journal of Ecology
1	African Journal of Ecology;
1	African Primates
1	Agriculture Ecosystems & Environment
0	Agriculture, food and aqua, earth and environmental science, wildlife management, and ecology
1	Alas not one but many: cons biol, biol cons, prob main two		0.5		0.5
0	ALL
0	all are available
0	All Cambridge journals - joz
0	All marine fisheries journals
0	All that deal with Avian Ecology
0	All the Elsevier publications
0	All the fields
0	All those related to Herpetology
0	Almost All
0	Almost all (it’s different based on kind of paper)
0	already covered
1	Ambio
0	American Anthropological Association
1	American Anthropologist
1	American Journal of International Law (AJIL)
1	American Journal of Primatology
1	American Journal of Primatology
1	Amongst others: International Environmental Agreements: Politics, Law and Economics; www.springer.com
0	An article related to Marine life, and climate resilience
1	Animal ecology, animal behavior, ecological letter, biology, ecology,...																	0.2
1	Animal Behaviour
1	Animal Behaviour
1	Animal Behaviour and Zoo Biology
1	Animal Conservation
1	animal conservation
0	Any
0	any intentional journal related do protected areas, EBM, etc.
0	any journal dealing with herpetology conservation
0	Any of the conservation journals really
0	Any on conservation generally
0	Any related with the taxa I'm involved (reptiles, amphibians, fishes and invertebrates)
0	Any relevant Springer journals.
0	Anything to do with Gender, and local communities.
1	Applied Ecology
1	Aquatic Biology
1	Aquatic Botany
1	Aquatic Botany
0.99	Aquatic conservation, Conservation Biology, Environmental Management, Policy & Planning		0.33
0	as their strategic focus varies over time there is no singular publication preference
0	Aucun spécifiquement. C'est le contenu qui importe, donc peut se retrouver dans différents supports...
1	Auk
1	Australian Journal of Botany
1	Australian journal of Outdoor Education or Canadian Journal of Outdoor education perhaps.
1	Avian Biology
0	Begin providing translations of central Asian & Russian reports and journal articles not available in English
0	Biodiversité, best practice guidline series, Actions plans
1	Biodiversity
1	Biodiversity
1	Biodiversity
1	Biodiversity & Conservation																																											1
1	Biodiversity & Conservation; IUCN's Global Marine/Coastal Program Publications																																											1
1	Biodiversity and Conservation																																											1
1	Biodiversity and Conservation																																											1
1	Biodiversity and Conservation																																											1
1	Biodiversity and Conservation																																											1
1	Biodiversity and Conservation																																											1
1	Biodiversity and Conservation																																											1
1	biodiversity and conservation																																											1
1	Biodiversity and Conservation; Journal of Vegtation Science																																											0.5
1	Biodiversity Conservation				1
1	Biodiversity Conservation																																											1
1	Biodiversity Conservation																																											1
1	Biodiversity conservation and Journal of arid environment																																											0.5
0	Biodiversity conservation and Protected Areas Management
1	Biodiversity Consrevation																																											1
0	Biodiversity journals
0	Biodiversity related journals
1	Biol. Conserv				1
1	Biological Conservation				1
1	Biological Conservation				1
1	Biological Conservation				1
1	Biological Conservation				1
1	biological conservation				1
1	Biological Conservation				1
1	Biological Conservation				1
1	Biological conservation				1
1	Biological conservation				1
1	Biological Conservation				1
1	Biological Conservation				1
1	Biological conservation				1
1	Biological Conservation				1
1	Biological Conservation				1
1	Biological Conservation				1
1	Biological Conservation				1
1	Biological conservation				1
1	Biological Conservation				1
1	Biological conservation				1
1	Biological Conservation				1
1	Biological Conservation				1
1	Biological Conservation				1
1	Biological Conservation				1
1	Biological conservation				1
1	Biological Conservation				1
1	Biological Conservation				1
1	Biological Conservation				1
1	Biological Conservation				1
1	Biological Conservation				1
1	Biological Conservation				1
1	Biological Conservation				1
1	Biological Conservation				1
1	Biological Conservation				1
1	Biological Conservation				1
1	Biological Conservation				1
1	Biological Conservation				1
1	Biological Conservation				1
1	Biological conservation				1
1	Biological Conservation				1
1	Biological Conservation				1
1	Biological Conservation				1
1	Biological Conservation				1
1	Biological Conservation				1
1	Biological Conservation				1
1	Biological Conservation Journal, Nature	0.5			0.5
1	Biological Conservation, Conservation Biology		0.5		0.5
0.96	Biological conservation, Oryx, Ibis, Science, Nature, journal of Wildlife management	0.16			0.16						0.16	0.16										0.16																				0.16
0.99	Biological Conservation, Trends in Ecology & Evolution, Conservation Letters			0.33	0.33																															0.33
1	Biological Coservation				1
1	Biological Invasions												1
1	Biological Invasions												1
1	Biological Invasions												1
1	Biology Conservation				1
1	BioScience
1	Biotropica
1	Bird Conservation International
1	Bird Conservation International
1	Bird Conservation International
1	Bird Conservation International
1	Bird Conservation international
1	BNHS
0	books
0	broad range of journals
0	bulletin
0	can´t say
1	Canadian Journal of Zoology
0	cannot name one in particular
0	Cannot single out one
0	Can't answer that question.
0	Can't choose one...
0	can't pick one (many conservation journals)
0.99	Can't pick one, Top 3: Conservation Genetics, Conservation Biology, Molecular Ecology...		0.33											0.33	0.33
0	Can't say
0	can't say; depends on species and topic
0	can't select just one journal, several are useful tools
1	cat news
1	CAT NEWS
1	CATNEWS
0	CEB HR Leadership, and all web site that concern HR position
0	cela dépend du thème de la recherche
1	chelonian conservation					1
1	Chelonian Conservation and Biology					1
1	Chelonian Conservation and Biology					1
1	Chelonian Conservation and Biology					1
1	chelonian Conservation and Biology					1
1	Chelonian Conservation and Biology ISSN:1071-8443					1
0	Choosing 1 is impossible
0	Climate Change
0	climate change modeling journal, climatic and environmental data base
0	Climate Change/smart agriculture
1	Climate Law
1	climatic change
1	Cnservation Biology		1
1	Coastal Zone Management Journal, Ocean & Coastal Management Journal, PArk Science, Management Science,																							0.25
0.99	Conserv Biol, Biol Conserv, Endang Spp Research and many others - not just one!		0.33		0.33																									0.33
1	Conserv Biol, Biol Conserv, J Zool, PNAS, Ecology		0.2		0.2													0.2
1	Conservation Biolofy		1
1	CONSERVATION BIOLOGY		1
1	Conservation Biology		1
1	Conservation Biology		1
1	conservation biology		1
1	Conservation Biology		1
1	Conservation Biology		1
1	Conservation Biology		1
1	Conservation Biology		1
1	conservation biology		1
1	Conservation Biology		1
1	Conservation Biology		1
1	Conservation Biology		1
1	Conservation Biology		1
1	Conservation Biology		1
1	Conservation Biology		1
1	Conservation Biology		1
1	Conservation Biology		1
1	Conservation Biology		1
1	Conservation Biology		1
1	conservation biology		1
1	Conservation biology		1
1	Conservation Biology		1
1	Conservation biology		1
1	Conservation Biology		1
1	Conservation Biology		1
1	Conservation Biology		1
1	Conservation Biology		1
1	Conservation Biology		1
1	Conservation Biology		1
1	Conservation Biology		1
1	Conservation Biology		1
1	Conservation Biology		1
1	Conservation Biology		1
1	conservation biology		1
1	Conservation Biology		1
1	Conservation Biology		1
1	Conservation Biology		1
1	Conservation Biology		1
1	Conservation Biology		1
1	Conservation Biology		1
1	Conservation Biology		1
1	Conservation Biology		1
1	Conservation biology		1
1	Conservation Biology		1
1	conservation biology		1
1	Conservation biology		1
1	Conservation Biology		1
1	Conservation biology		1
1	Conservation Biology		1
1	Conservation Biology		1
1	Conservation Biology		1
1	Conservation Biology		1
1	Conservation Biology		1
1	conservation biology		1
1	Conservation Biology		1
1	Conservation Biology		1
1	Conservation Biology		1
1	Conservation Biology		1
1	Conservation Biology		1
1	Conservation Biology		1
1	conservation biology		1
1	Conservation Biology		1
1	Conservation Biology		1
1	Conservation Biology		1
1	Conservation biology		1
1	Conservation Biology		1
1	Conservation Biology		1
1	Conservation Biology		1
1	Conservation Biology		1
1	Conservation Biology		1
1	Conservation Biology		1
1	Conservation biology		1
1	Conservation Biology		1
1	Conservation biology		1
1	Conservation Biology		1
1	Conservation biology		1
1	Conservation Biology		1
1	Conservation Biology		1
1	Conservation Biology		1
1	Conservation Biology		1
1	Conservation Biology		1
1	Conservation Biology		1
1	Conservation Biology		1
1	Conservation Biology		1
1	Conservation Biology		1
1	Conservation Biology		1
1	Conservation biology		1
1	Conservation Biology		1
1	Conservation Biology		1
1	Conservation Biology		1
1	conservation biology		1
1	Conservation Biology		1
1	conservation biology		1
1	Conservation Biology		1
1	Conservation Biology		1
1	Conservation Biology		1
1	conservation biology		1
1	Conservation biology		1
1	Conservation Biology		1
1	Conservation Biology		1
1	Conservation Biology		1
1	Conservation Biology		1
1	Conservation Biology		1
1	Conservation Biology		1
1	Conservation biology		1
1	Conservation Biology		1
1	Conservation Biology		1
1	Conservation Biology - has the largest number of papers of relevance		1
1	Conservation Biology (and others ...)		1
1	Conservation Biology (but I have access to it)		1
1	Conservation Biology (et de nombreux autres)		1
1	Conservation Biology (I already have access to it)		1
1	CONSERVATION BIOLOGY (Wiley)		1
1	Conservation Biology and journals like that		1
1	Conservation Biology and Science		0.5								0.5
1	Conservation Biology Molecular Ecology Conservation Genetics, Science, Nature	0.2	0.2								0.2			0.2	0.2
1	Conservation Biology of Freshwater Turtles and Tortoises
1	Conservation biology, and PLOS ONE		0.5																																								0.5
1	Conservation Biology, Biological Conservation and other		0.5		0.5
1	Conservation Biology, Biological Conservation or something similar, but this is a difficult question, as literature is spread far and wide		0.5		0.5
0.98	Conservation Biology, Biological Conservation, IBIS, Bird Conservation International, Oryx, Condor, Journal of Raptor Research		0.14		0.14																	0.14																				0.14
0.99	conservation biology, science, nature	0.33	0.33								0.33
1	Conservation Biology, Trends in Ecology and Evolution		0.5	0.5
1	Conservation Biology. But I have access		1
0.99	Conservation Biology; Biodiversity Conservation; PNAS; Most of Elsevier journals		0.33																																									0.33
1	Conservation Genetics													1
1	conservation genetics													1
1	Conservation Genetics													1
1	Conservation Genetics													1
0.99	Conservation Journal, Parks Journal, Nature Journal	0.33																					0.33	0.33
0	conservation journals
1	conservation letters																																			1
1	Conservation Letters																																			1
1	conservation letters																																			1
1	Conservation Letters																																			1
1	Conservation Letters																																			1
0.99	Conservation Letters, Journal of Applied Ecology, Forest Ecology & Management, Biodiversity and Conservation, Global Change Biology, Trends in Ecology & Evolution, Nature, Science, Plos One	0.11		0.11							0.11																									0.11							0.11	0.11
0	conservation related journals
1	Conservation related journals (BioCon, ConBio, Wildlife Management, Applied Ecology, Mammalogy)		0.2		0.2							0.2				0.2
1	Copeia									1
1	COPEIA									1
1	Copeia									1
1	coral reefs journal Springer and Oryx Conservation Journal																				0.5	0.5
1	Cornell Birds of North America, The Journal of Wildlife Management											0.5
1	CSG Newsletter
1	CSG Newsletter
1	Cultural Geographies—published by Sage Publications
0	Current requests have been for conference proceedings but open access to scientific journals increaese productivity of independent searches.
1	Cybium
1	Deep-sea Research II
0	depends on the topic - a number of them
0	depends on the topic I am working on.
0	Different Biological journals, my connection is specifically to the Journal of Natural History Museum published in Nepal.
0	difficult to decide
0	Difficult to name one.
0	Difficult to say
1	Difficult to say - there are a number of journals that carry important articles for my work - Marine Mammal Science, The Journal of Cetacean Research and Management, Aquatic Mammals, Endangered Species Research....																										0.25			0.25
0.99	difficult to say, because the papers I need are published in many journals like PLOS One, Biologcial Conservation, Oryx, etc.				0.33																	0.33																					0.33
0.99	Difficult to say, depends on the topic. Science and Nature are very hard to get ahold of as is Ecology.	0.33									0.33							0.33
0	Difficult to say, the literature is so widespread
0	Diversité biologique
1	Diversity & Distributions
0	do not know
0	document juridique
0	données scientifiques sur les espèces
0	don't have a favourite - elephant stuff is published all over
0	Don't know. I can't access them to even know.
1	e.g. Biological conservation				1
0	eco.mont
1	Ecological Applications
1	Ecological Applications
1	Ecological Economics
1	ecological economics
1	ecological economics
1	Ecological Economics/ systems journals in general
1	Ecological Management & Restoration; Restoration Ecology (Wiley Online Library)
1	ecology																	1
1	Ecology																	1
1	Ecology																	1
1	Ecology																	1
1	Ecology																	1
1	Ecology																	1
1	Ecology																	1
1	Ecology																	1
1	Ecology																	1
1	Ecology																	1
0	Ecology and Environment
1	ecology and society
1	Ecology and Society
1	Ecology letters
1	Ecology, TREEE,Ecology Methods, etc. Conservation Biology etc		0.25	0.25														0.25																	0.25
1	Ecosystem services
1	ecosystem services.
0	Ecosystem Services. Science, Policy and Practice
0	Ecosysteme pelagique marin , interactions air-mer o
1	Ecotoxicology						1
1	Education for Sustainable Development																									1
1	EIA Review																																				1
0	Elsever
0	Elsevier
0	Elsevier
0	Elsevier
0	elsevier
0	elsevier
0	Elsevier and Springer - ecology, wetlands management, marine pollution
0	Elsevier and Wileys editors
1	Elsevier publications such as Biological Conservation				1
0	elsevier, springer
0	emerging diseases
1	Endangered Species Bulletin
1	Endangered Species Research																													1
1	Energy Economics
0	Entomology, Zoology
1	Enviromental biology of Fish
0	environement, ecological restoration
1	Environment and Planning. Environmental Management.
0	Environmental - related Journals
1	Environmental Conservation
1	Environmental Education
1	Environmental Education Research																															1
1	Environmental Education Research																															1
1	Environmental Education Research (EER)																															1
1	Environmental Ethics
1	Environmental Impact Assessment Review																																				1
1	Environmental Management																																														1
1	Environmental Management																																														1
1	Environmental policy and law																											1
1	Environmental Policy and Law																											1
1	Environmental Science & Policy
1	Environmental Science & Policy
1	Environmental Science and Policy
1	Environmental Science and Policy
1	Environmental Science and Policy
1	European Journal of Wildlife Research
0	everyone on Botany
1	Evolution																																												1
0	exotic pet medecine journal
0	Fauna and flora
0	Field related like methodology, data analysis, case study so that we get idea to replicate
1	Fish biology								1
0	Fisheries/ecology related journals
0	Floristic journal
0	For now none
0	FOREST CONSERVATION
0	Forest Policy and Management
0	Forest, Environment and Wildlife Conservation.
1	forktail
0.96	Frontiers in ecology and environment, Bioscience, TREE, Conservation Biology, Nature, Nature Climate	0.16	0.16	0.16																																		0.16
1	Fungal Ecology
0	Gestion de l'environnement
1	Giraffa
1	Global Change Biology
1	Global change biology
1	Global Ecology and Biogeography
1	Global Environmental Change
1	Global Environmental Change
1	global environmental change: human and policy dimensions
1	Great question but I have no way to formulate the answer. Probably something simple like Nature.	1
1	Hard question. Most useful is Croc Specialist Group Proceedings.
0	Hard to choose one - I refer to several conservation and herpetological journals.
0	Hard to choose single one, older articles in less famous journals without free access are maybe the biggest problem.
0	hard to decide
0	Hard to name just one!
0	Hard to name one
0	hard to say
0	Hard to say as needs are so varied
0.99	hard to say, Conservation Biology, Biological Conservation, Oryx		0.33		0.33																	0.33
1	Hard to say...maybe TREE or Biological Conservation			0.5	0.5
1	Herpetological																												1
1	Herpetological Conservation and Biology
1	Herpetological Journal																												1
1	Herpetology
0	HIV and AIDS related
1	http://www.journals.elsevier.com/ocean-and-coastal-management
0	http://www.sciencedirect.com/
0	Human dimensions of wildlife
0	Human dimensions of wildlife management
1	Human Ecology
1	Human Ecology, An Interdisciplinary Journal
1	Human Ecology? Really require broad range
1	hydrobiologia
0	I already have access to many through my work.
0	I already have access to the journals I need.
1	I already subscribe to several and the one I find most relevant to my work is Human Organization, published by the Society for Applied Anthropology, USA.
0	i am interested on activity relating to environmental awareness and want that I should know upto date knowledge of flora and fauna and its status and new findings in this regard.I can teach if I know.
0	I can access all that I need.
0	I can access everything I need
0	I can access them!
0	I can not select only one. I work in wildlife and habitat conservation, and human dimensions issues. There is no single journal that I can rely on.
1	I cannot select one. The main herpetological literature, as well as journals as Biodiversity and Conservation, Diversity and Distribution.																																											0.5
0	I do have access to important journals in my library here which gets e journals. However some publications refered at IUCN websight are paid and these are costly. IUCN
0	I do not have one journal that I prefer. I follow topics of my interest.
0	I don't know
0	I don't know, depends a lot where the researcher working in my area and region publish his work
0	I don't rely on a specific journal. From my tasks and activities it's not useful to focus only on one journal.
0	I don't think there is just one journal
1	I have access to all key ones. A key journal is Conservation Letters, but that is now open access.																																			1
0	I have access to all major journals.
0	I have access to all needed
0	I have access to all relevant ones
0	I have access to all the journals I need
0	I have access to necessary journals
0	I have easy (electronic) access to all the major journals.
0	I have easy access to most of what I need
0	I have no idea.
0	I have not been tracking which journals I access most fequently. It depends on what I am focusing on. Sorry.
0	I use a wide range of journals; I subscribe to the most important ones
0	I use too many to name just one.
0	I work across species groups, so there isn't one single one. It is primarily regional/foreign language journals that may be important to get access to.
0	I would not rely on only one journal.
0	I would prefer an access to Elsevier or similar not only one journal
1	IBIs																																									1
1	Ibis																																									1
1	IBIS																																									1
1	IBIS, Conservation Biology, Nature, Science	0.25	0.25								0.25																															0.25
1	ICES JMS and FISH AND FISHERIES							0.5
1	Ices journal of marine resreach							1
1	ICES Journal of Marine Science							1
1	ICES Journal of Marine Science							1
1	if you mean OA, then Zootaxa																1
0.99	impossible to just pick one; Conservation BIology, Animal Conservation, Biological Conservation, and many others		0.33		0.33
0	Impossible to say
0	Impossible. One journal would not possibly be enough
1	Insect Conservation and Diversity
1	Insect Conservation and Diversity
1	Internaional Forest Review (IFR)
0	International Environmental Agreements: Politics, Law and Economics
1	International Forestry Review
1	International Journal of Biodiversity Science, Ecosystem Services & Management
1	International Journal of Cultural Property
1	International Journal of Ecology
1	International Journal of Environmental and Science Education																																						1
1	International Journal of Forestry Research
1	International Journal of Primatology
1	International Journal of Primatology
1	International Journal of Primatology
1	International Journal of Primatology? (not sure)
1	International Journal of Sustainable Tourism
1	International Journal of Wilderness by the WILD Foundation
1	International journals on Conservation, ORYX for example																					1
0	Internet published different sources of literature
0	It depends, there is no single journal that I use most
0	It improve the overall documenet with tested methods in field. It aslo give global prospective of the situtation to deal with.
0	It is not one particular journal but access to Geneva bat library
0	it is very hard to name only one journal. Probably: Biological Conservation
0	It varies according to the research topic - I have many.
0	It varies: but bridging (science-management; science-Policy) are needed
0	its to diverse to respond to this question
0	It's very difficult to isolate a single journal
1	IUCN eJournal - Env. Acad. Law																																													1
0	IUCN guidelines
0	IUCN HQ Library
1	IUCN Otter Specialist Group Bulletin
1	IUCN PARKS Journal																							1
0	IUCN publications - strategies, guidelines etc.
0	IUCN Red List of ecosystems
0	IUCN Red List of Threatened Species
0	IUCN reports
1	IUCN Species Bulletin
1	IUCN SSC_Species e-bulletin
0	IUCN Traffic Reports and Journals
0	IUCN/SSC Specialist Group Newsletters
1	J Conservation																						1
1	J of Animal Ecology
1	J Wildlife Manage											1
1	J. of Wildlife Management											1
0	j'ai consulté aucun journal vu que je ne connaissais pas l'existence de cette bibliothèque
0	je reçois plusieurs revues en ligne que je consulte régulièrement.
1	JEM
1	JEMBE
0	journal about the protected areas, species journal
0	Journal articles
0.96	journal Avian Ecology, Ibis, Journal Applied Ecology																																									0.33
1	journal de Conchyliologie																																	1
1	Journal for Nature Conservation																																								1
1	Journal for Nature Conservation																																								1
1	Journal for Nature Conservation																																								1
1	Journal for Nature Conservation- Elsevier																																								1
1	Journal of Animal Ecology
1	Journal of Animal Ecology
1	Journal of Applied Ecology
1	Journal of Applied Ecology
1	Journal of Applied Ecology
1	Journal of Applied Ecology
1	Journal of Applied Ecology
1	Journal of Applied Ecology
1	Journal of Applied Ecology and Biological Conservation				0.5
1	Journal of Biodiversity & Endangered Species
1	Journal of Biogeography
1	Journal of Biogeography
1	Journal of Biogeography
1	Journal of Biological Conservation				1
1	Journal of Cetaceann Research and Management																										1
0	Journal of Computer Society
1	Journal of Conchology																																	1
1	Journal of Conservation Biology		1
1	Journal of Conservation Biology (I subscribe, and would send my copy to the IUCN Library at the bangkok Regional Office, if they had a library.		1
1	Journal of coral reefs																				1
1	journal of ecology
1	Journal of Ecology
1	Journal of ecology
1	Journal of Ecology
1	Journal of Environmental Health
1	Journal of Environmental Law
1	Journal of Environmental Management
1	journal of environmental management
1	Journal of Environmental Management
1	Journal of Environmental management ; Environmental Sciences & Technologies
1	Journal of Environmental Planing and Management
1	Journal of Envrionmental Management
1	Journal of fish biology								1
1	Journal of Fish Biology								1
1	Journal of Fish Biologyt								1
1	journal of forest management																																															1
1	Journal of Herpetology
1	Journal of Herpetology
1	Journal of Herpetology
1	Journal of Herpetology and/or Herpetologica
1	Journal of human rights and the environment
1	Journal of Hydrogeology
1	Journal of Hydrology
1	Journal of Insect Conservation
1	Journal of Insect Conservation
1	Journal of leisure research
1	Journal of LINNEAN SOCIETY of London
1	Journal of Mammalogy															1
1	Journal of mammalogy															1
1	Journal of Mammalogy															1
1	Journal of Mammalogy															1
1	Journal of Mammalogy (but I already have access to it)															1
1	Journal of Mammology															1
1	Journal of marine and coastal law
1	Journal of Natural Resources Law
1	Journal of Ornithology
1	Journal of Phycology and European Journal of Phycology and some Elesiver Journals
0	Journal of Protected Areas
1	Journal of Sustainable Tourism
1	Journal of Sustainable Tourism
1	Journal of Threatened Taxa
1	Journal of Threatened Taxa
1	Journal of Tropical Ecology
1	Journal of Tropical Ecology
1	Journal of Wilderness Management																														1
1	journal of wildlife diseases
1	Journal of Wildlife Diseases
1	Journal of Wildlife Management											1
1	Journal of Wildlife Management											1
1	Journal of Wildlife Management											1
1	Journal of Wildlife Management											1
1	Journal of Wildlife Management											1
1	Journal of Wildlife Management											1
1	Journal of Wildlife Management											1
1	Journal of Wildlife Management											1
1	Journal of Wildlife Management											1
1	Journal of Zoo and Wildlife Medicine
1	Journal of Zoology
1	Journal of Zoology
1	Journal of Zoology
1	Journal of zoology
1	Journal on Environmental Economics and Management
0	Journal on Protected Areas
0	Journal on Species conservation
0	journals on new developments concerning conservation
0	journals publshing on ecology, biodiversity IAS
0	Journals related to forests ,biodiversity climate change erc
0	Journals that are related to conservation an protection
1	Jpornal of Ichtghyology
0	JSTOR
0	JSTOR
0	JSTOR
0	JStor collection of online journals
0	JSTOR--not one particular journal.
1	JTT
1	Kew Bulletin																																																1
1	Kirkia
1	la RADE
1	Land Use Policy
0	le journal sur la medecine veterinaire de la faune sauvage
0	le livre rouge ainsi que les publications périodiques (revues).
0	les rapports
0	Les revues de conservation à fort facteur d'impact, mais aussi revues locales peu connues
0	Liste rouge de l'UICN
0	local journals are important for particular populations and threatens
0	Local reports
0	Lournals covering environmental management and marine sciences
0	magazine with no particular titel
1	Mammal Review																			1
1	Mammal Review																			1
1	Mammal Review																			1
0	Mảngove, conservation
0	Many
0	many
0	many
0	many
0	many
0	Many Chinese Journals are just to hard to access, even Russian Journals are easier. Non-english websites make it even harder to access these papers and there is a wealth of data being generated there.
0	many different ones
0	many different, cannot specify
0	many ecological magazines
0	Many journals are essential
0	Many orchid-related journals
0	Many peer reviewed journals that publish conservation related research
0	Many related to ecology
0	many!
0	Many!
1	Many, but including amongst others Aquatic Conservation (Elsevier)
0	MANY, NOT ONE
0	Marine and coastal ecology ; marine and coastal biodiversity ; fisheries ; marine / coastal conservation
0	marine and terrestrial conservation areas
0	marine biodiversity and red lists
1	Marine Biology
1	Marine Biology (International Journal on Life in Oceans and Coastal Waters)
1	Marine biology and fisheries related journals
1	Marine biology, Nature, Marine Ecology Progress Series, Coral Reef	0.25																			0.25												0.25
0	Marine conservation
0	Marine Eco system and river system
1	Marine Ecogy Progress Series																																1
1	Marine Ecology Progress Series																																1
1	Marine Ecology Progress Series																																1
1	MArine Ecology progress Series																																1
1	Marine Ecology Progress Series																																1
1	Marine Ecology Progress Series																																1
0	Marine Fisheries/conservation
1	Marine Mammal Science
1	Marine Mammal Science
1	marine mammal science
1	Marine Mammal Science
1	marine mammal science
1	Marine mammal scientific literature is scattered across 1,000 journals
1	Marine Mammals
1	Marine Policy
1	Marine Policy
1	Marine Policy
1	Marine Policy
1	Marine policy
0	Medicine
0.99	MMS, TREE, Plos One			0.33																																							0.33
1	Molecular Ecology														1
1	Molecular Ecology														1
1	Molecular Ecology														1
1	Molecular Ecology														1
1	Molecular Ecology														1
1	Molecular Ecology														1
1	Molecular Ecology														1
1	Molecular ecology--but I already have access to it.														1
1	Molecular Exology														1
0	Molecular Genetics
0	Most of Elsevier journals
0	Most of them
0	Multiple ecology and conservation related journals
1	multiple, but eg. Australian Journal of Botany
0	my needed lit is all over the map, no one journal would change things much for me
0	n.a.
0	n/a
0	N/A
0	N/a
0	n/a
0	N/A
0	n/a
0	N/A
0	N/A - I have access to all.
0	N/A - I have access tothe vast majority of journals
0	NA
0	NA
0	na
0	Na
1	Natura orax etc	0.5																				0.5
1	Natural Hazards
0	Natural resource management
1	Nature	1
1	Nature	1
1	Nature	1
1	Nature	1
1	Nature	1
1	Nature	1
1	Nature	1
1	Nature	1
1	Nature	1
1	Nature	1
1	Nature	1
1	Nature	1
1	Nature	1
1	Nature	1
1	Nature	1
1	Nature	1
1	Nature	1
1	NATURE	1
1	Nature	1
1	Nature	1
1	Nature	1
1	Nature	1
1	Nature	1
1	Nature	1
1	Nature	1
1	Nature	1
1	Nature	1
1	Nature	1
1	Nature	1
1	Nature	1
1	Nature	1
1	Nature	1
1	NATURE	1
1	Nature	1
1	Nature	1
1	Nature	1
1	NATURE	1
1	Nature	1
1	Nature	1
1	Nature	1
1	Nature	1
1	NATURE	1
1	nature	1
1	Nature	1
1	Nature	1
1	Nature & Science	0.5									0.5
1	Nature and related Nature publications	1
1	Nature and Science	0.5									0.5
1	Nature and Science	0.5									0.5
1	Nature Climate Change																																					1
1	Nature Climate Change																																					1
1	Nature Climate Change																																					1
1	NATURE et SCIENCES	0.5									0.5
1	Nature or Science	0.5									0.5
1	Nature, Conservation Biology	0.5	0.5
1	Nature, Science	0.5									0.5
1	Nature, Zoo Biology, International Zoo Year Book, Animal Behaviour, Journal of Wildlife Diseases.	0.2
1	Nature. Science	0.5									0.5
1	nature// ursus	0.5
1	nature// ursus	0.5
0.99	Nature; or Journal of Environmental Planning and Management; or Conservation and Society	0.33
1	Natures Sciences Sociétés
1	Neotropical Primates
1	New Phytology
1	New Scientist
0	no idea
0	No idea
0	no idea, sorry
0	no one in particular
0	no ONE journal
0	No one journal
0	no one journal as I needed species specifc data not more general ideas
0	No one journal over any other
1	No one journal, Zootaxa (the hardest one to obtain), Copeia, J. Herpetology, Herpetologica, Molecular Phylogenetics & Evolution									0.2							0.2
0	No one journal.
0	No one specific journal
0	no one specific journal
0	no opinion
0	no problems with access
0	no single journal
0	No single journal
0	no single journal
0	no single journal would make a critical difference
0	No single journal, many are essential
0	no single one rather searching all for published info
0	No single one would do!
0	no single one.
0	no specific journal
0	No specific one
0	No specific one in particular.
0	No specific one.
0	no specific single journal
0	Nombreux !
0	none - it is the diversity of sources that matters
0	None are so special - just track papers dwn as necessary
0	none in particular - I acess very many pover the course of a year
0	none: relevant material dispersed
1	northwestern naturalist
0	Not a journal but scrivener in general
0	not a journal but web of science
0	not a problem
0	Not a single one, there are several important
0	not a single, but several dealing with wildlife ecology and management
0	Not a specific journal. It's access to a readily available search engine that is important
0	Not applicable
0	Not aware of any - language and grey literature are main barriers
0	not just one
0	Not just one but a set of them
0	not known
0	Not one
0	Not one - I need access to a range of articles in different journals
0	not one single journal
0	Not one single one -- all main conservation journals
0	Not one specifc journal
0	not one specifically
0	not only one...
0	Not possible to say. My needs are based on subject
0	Not possible to single out one journal.
0	Not really sure of the names of the journals
0	not relevant as I already have easy access
0	Not specific. But, those publications concerned with marine protected areas and integrated coastal management.
0	Not sure
0	not sure
0	Not sure
0	Not sure
0	Not sure should deal with society and natural resources.
0	not sure there are many
1	Not sure, but probably one of the conservation journals (although I use a variety of journal types in addition to conservation ones). E.g. Conservation Biology, Biological Conservation. Much of the work I view is published in more local journals		0.5		0.5
0	Not sure.
0	Not yet accessed any journal for IUCN related work
1	Nova Hedwigia
1	NPG Group Journal	1
1	nternational Journal of Social Ecology and Sustainable Development
0	Numerous
1	Obscure Herpetological journals, Ibis																																									1
1	Occasional paper of the IUCN species survival commission
1	Ocean and Coastal Management
1	Ocean and Coastal Management
1	Ocean and Coastal Management (Elsevier)
1	Oecologia
0	On species
0	Only one would not help - need a wide range
1	Ornitologia Neotropical, El Hornero,
0	ornitological journal
1	Oryx																					1
1	Oryx																					1
1	Oryx																					1
1	Oryx																					1
1	Oryx																					1
1	Oryx																					1
1	Oryx																					1
1	Oryx																					1
1	Oryx																					1
1	Oryx																					1
1	Oryx																					1
1	Oryx																					1
1	Oryx																					1
1	oryx																					1
1	Oryx																					1
1	Oryx																					1
1	Oryx (FFI)																					1
1	Oryx and Conservation Biology		0.5																			0.5
1	Oryx, Flora and Fauna International																					1
1	Ostrich
1	Ostrich
1	Oxford journal of environment law
1	Oxford Journal of Environmental law http://jel.oxfordjournals.org/
1	Pachyderm
1	Pacific Science
1	Pacific Science - not sure
0	PACO
1	PARK																							1
1	Parks																							1
1	Parks																							1
1	Parks																							1
1	Parks																							1
1	PARKS																							1
1	Parks																							1
1	Parks																							1
1	Parks																							1
1	Parks																							1
1	Parks et																							1
1	Parks Journal																							1
1	Perhaps "Biological Conservation"				1
1	Perhaps Conservation Biology - but not one of the major conservation/population biology/zoology journal really jumps out above the others		1
1	Perhaps Journal of Environmental Management
1	Philosophical Transactions of the Royal Society B																		1
0	photo library
1	Phytotaxa, Systematics and Biodiversity, Conservation Biology, Plos One, Molecular Phylogenetics and Evolution, national and regional Floras, etc…		0.2																																								0.2
0.99	Plant Byosistems, Acta Botanica Gallica, Plant Sociology
0	plants.jstor
0	Please consuider a range anthropology to environmental management
0	Plenty: most of my work requires references to vast variety of journals.
0	PLOS
1	PLos One																																										1
1	Plos One																																										1
1	PLOS One																																										1
1	plos one																																										1
1	PLOS One																																										1
1	PLOS ONE																																										1
1	PLOS One																																										1
1	Plos One																																										1
1	PNAS
1	PNAS
0	Policy and education
1	Primate, International Journal of Primatology, Oryx, Journal of Mammalogy,															0.25						0.25
1	Probably Copeia; I am, after all, a herpetologist...									1
1	Proceedings of the National Academy of Science
0	Protect area management
0	protected area management
0	proteted areas, climate
0	Question vague "journal scientifique"....il fallait au moins mettre des exemples pour avoir un état des besoins
0	Rather content related, no specific one
0	RDB-related
0	Really hard to pick just one
0	Really, there isn't a single journal that covers everything
0	red list
0	Red List of Species
0	red lists
0	RED LISTS update
0	Redlist and SSC
0	Reductionism does not work with respect to access to scientific literature. There is no single journal. There are many.
0	Related to Climate Changes, Energy and Natural Resource Management
0	Related to endemic and threatened plants
0	related with scientific evidence.
0	Reports and journals
0	Restauration écologique des aires protégées
1	Restoration Ecology
1	Restoration Ecology
1	Restoration Ecology
1	Revista de Biologia Tropical
1	Revista de Direito Ambiental
1	Revue Africaine de Droit de l'Environnement
1	revue droit de l'environnement
1	revue juridique de l'environnement
0	Rien de particulier
1	Risheries Research
0	Sage
1	Sandgrouse
0	save white-rumped vulture from extinction
1	Schipper et al. 2008. SCIENCE. VOL 322										1
1	Science										1
1	Science										1
1	Science										1
1	Science										1
1	Science										1
1	Science										1
1	Science										1
1	science										1
1	Science										1
1	Science										1
1	Science										1
1	Science										1
1	Science										1
1	Science										1
1	Science										1
1	Science										1
1	Science										1
1	Science										1
1	Science										1
1	Science										1
1	Science										1
1	Science										1
1	Science										1
1	Science										1
1	Science										1
1	Science										1
1	science										1
1	Science										1
1	Science										1
1	Science										1
1	Science										1
1	SCIENCE & NATURE	0.5									0.5
1	Science (because it is the most widely read and publicly understandable)										1
0	Science and Technology journals
0	Science Direct Journals
0	Science direct, JSTOR, Springer
0	Science directory
1	Science et vie et Science et avenir
1	Science magazine										1
1	Science' or 'Nature', but more would be better.	0.5									0.5
1	Science, Nature	0.5									0.5
1	Science, Springer Journals										1
0.99	Science,Nature, The Economist	0.33									0.33
0.98	Science; Nature; PLOS; PNAS; Conservation Letters; Conservation Biology; Biological Conservation; Biodiversity & Conservation	0.14	0.14		0.14						0.14																									0.14								0.14
0	sciences directe
1	scientific American
1	Scientific American
0	scientific articles on turtles
0	scientific publications
0	scientific review journals on environment and nrm
0	see note a 6.
0	SER
0	Several
0	several
0	several journals
0	several journals of equal impact. Always have indirect access.
1	Several to mention, here's the most important: Webbia, Bocconea, Flora Mediterranea, Taxon, Journal of European Orchids.
0	several,
0	sevral conservation journals...
0	silly question: totally depends on isue at stake.
1	Society and Natural Resources
1	Society and Natural Resources
1	Soil Biology Biochemistry, Biology and fertility of soils
0	some journals
0	some of them
0	Sorry - not so simple!!!
0	Sorry, but just one wouldn't address the issue.
1	South African Journal of Wildlife Research
1	species
1	species
0	Species and Botany journal article.
0	species and ssc books.
0	Species classification
0	Springer
0	Springer
0	Springer
0	Springer
0	Springer,
0	ssc books and redlist.
1	Subterranean Biology																								1
1	Suis intéressé souvent par le journal le PACHYDERM et sur tous les articles de la CSE,, de la commission sur les aires protégées et les écosystèmes, la liste rouge
0	Summon
0	Sur la gestion des ressources naturelles
1	Swara
1	Systematic Botany
0	TAG, GRACE,
1	Taxon
1	TAXON
1	Taxon - all editions - and other publications by the IAPT - International Association for Plant Taxonomy
0	Taxonomic journals
0	Taxonomy, Systematics, conservation journals
0	That depends.
0	The collection of journals under the Taylor and Francis scientific network.
1	The Condor
0	The economic value of Biodiversity
1	The ICF Bugle and other magazines devoted to cranes
0	The International Journal of Climate Change
1	The Journal of Conchology																																	1
1	The Journal of Environmental Law (OXFORD)
1	The Journal of Wildlife Management											1
1	The journal of wildlife management											1
1	The Lancet
1	The Lichenologist
1	The Management Wildlife Journal											1
0	The one related with Forest Landscape Restoration(Best experiences form other countries)
0	the ones i need i access via the University Library
1	The Ostrich
0	There are a few
0	There are many
0	There are many in different fields
0	There are many journals that will have varying relevancies based on the subject being researched/explored.
0	There are numerous zoological & botanical journals I refer to
0	There are several journals
0	there are so many impossible to select one
0	there are various journals very relevant to my work
0	There is no one a few about conservation
0	there is no one journal
0	There is no one journal as my work is interdisciplinary.
0	There is no one journal!
0	There is no one single journal.
1	There is no one single journal. But for example we do not have access to Nature.	1
0	There is no single journal as I need to consult many different publications
0	There is no single journal.
0	there is no single one as invasive spceis span such a breadth of disciplines
0	There is no specific journal.
0	There is not a single one. Literature requirements are project and task specific.
0	There is not just one.
0	There is not just one.
0	There is not one -- many equally impt
0	there is not one I Need access to all of them related to biology andconservation
0	there is not one journal - I consult a variety which is extremely important
0	There is not one single largest impact journal
0	there is not one, of course.
0	there is not only one
1	THere is not only one scientific journals so that's very complicated to answer. For example: Folia Primatologica, Oryx, The DODO, Zoo Biology																					0.25
0	There isn't just one
0	there isn't just one
0	There isn't just one journal.
0	There isn't just one.
0	There isn't just one.
0	this is a tough question as there are many that could be cited here
0	This is difficult to answer: no one journal!
0	This question is too simple, you never know what journal you have to look after
0	This varies enormously, and is related to the specific problem that just needs published information.
0	Those in the area of Sports Science and Medicine
0	threaten species
0	To many to name! Anything behind a paywall that covers SPP specialist group areas.
0	to many, but mostly on BioOne
0	too difficult to narrow to one
0	too hard to pick one.
0	Too many to choose just one.
0	too many to choose one
0	Too many to decide!
1	Too many to list. Maybe Biotropica or Ecology.																	0.5
0	too many to mention
0	Too many!
0.99	Too many! BioCon, ConBio, BioInv		0.33		0.33								0.33
1	too many. Wildlife management											1
0	top many to list
1	Tough question - possibly Conservation Biology!		1
0	Tous les journaux
0	tout sur les diagnostiques et le redd+
0	toutes les revues liées à la conservation des milieux et de la faune aquatique et la pêche durable
1	Trends in Ecology and Evolution			1
0	tricky to name just one
0	un grand nombre de périodiques !
0	unable to answer at this time - depends on project, usually
0	Unfortunately there is no single journal. Articles on sharks are spread across many journals
0	Unsure.
0	updated Threatened species
1	Urban ecosystems
0	urban protected areas and biodiversity
0	varies
0	varies
0	variety of journals publishing papers about ecology, biodiversity and conservation
0	various
0	various
0	Various
0	various
0	various
0	Various Elsevier/ScienceDirect publications :)
0	various IUCN publicatioins
1	various journals of ecology, e.g. Applied Ecology
1	Waterbirds
1	WAZA Magazine and WAZA News
0	We have ready access to many journals. For my work as administrator, no one journal is most important.
0	we require a broad range of journals from ecological to socio economic
0	Web of Science (not a journal as such, but content database for many journals)
1	Wetlands Ecology and Management - by Springer																																							1
0	what a silly question a huge range is needed
1	wildlife disease
1	Wildlife Diseases Journal
1	Wildlife Research
1	Wildlife Research, Conservation Biology		0.5
0	Wiley
0	Wiley online library
0	Wiley Online Library, but not free access
0	will let you know next time I'm searching for an article!
1	Wilson Journal of Ornithology
1	World Development
1	World Development
0	WWF, IUCN related literature, Journal of Ecosystem
0	Yes
1	zoo biology
1	Zoo Biology
1	Zoo Biology
1	Zoo Biology
1	Zoo Biology
1	Zoo Biology
1	Zoo Biology - but difficult to name just one
1	zoo biology, international zoo yearbook, ornithology journals
1	zoological record
1	Zootaxa																1
1	Zootaxa																1
1	Zootaxa																1
1	Zootaxa																1
1	Zootaxa																1
1	Zootaxa																1
1	Zootaxa																1
1	zootaxa																1
1	Zootaxa																1
1	Zootaxa																1
1	Zootaxa																1
1	Zootaxa																1
1	Zootaxa																1
1	Zootaxa																1
1	Zootaxa																1
1	Zootaxa																1
1	zootaxa																1
1	Zootaxa																1
1	Zootaxa																1
1	Zootaxa																1
1	Zootaxa																1
1	Zootaxa																1
1	Zootaxa																1
1	Zootaxa																1
1	Zootaxa																1
1	Zootaxa (not all papers are open access)																1
1	Zootaxa, amongst several key sources																1
1	Zootaxa, Herpetological Review																0.5
1	Zootaxa, Ichtyological Journal																0.5
0.99	Zootaxa, Nature, Science	0.33									0.33						0.33
[truncated: 187 more columns]

## Sheet: Journals
Google Scholar h5 2015	Sum	Journal
53	130.88	Conservation Biology
379	59.95	Nature
63	58.82	Biological Conservation
312	42.68	Science
29	29.53	Zootaxa
0	21.96	Oryx
30	15.86	Journal of Wildlife Management
36	14.08	Biodiversity and Conservation
0	13.58	Parks
61	11.48	Ecology
78	9.53	Molecular Ecology
166	9.47	PLoS ONE
56	9.14	Journal of Applied Ecology
0	8.45	Zoo Biology
65	7.5	Journal of Environmental Management
28	7.25	Marine Mammal Science
44	6.58	Conservation Letters
28	6.45	Journal of Mammology
48	6.25	Marine Ecology Progress Series
0	6	Chelonian Conservation and Biology
17	5.14	Bird Conservation International
54	5	Environmental Science and Policy
42	5	Marine Policy
25	4.88	Ibis
0	4.7	Journal of Herpetology
25	4.53	Conservation Genetics
0	4.25	International Journal of Primatology
0	4.25	Ocean and Coastal Management
0	4.2	Copeia
0	4.2	Journal of Wildlife Diseases
25	4.2	Journal of Zoology
64	4	Ecological Economics
0	4	Journal for Nature Conservation
59	4	Journal of Ecology
0	4	Journal of Environmental Law
0	4	Journal of Fish Biology
0	4	Species
215	3.67	Proceedings of the National Academy of Science of the USA
39	3.5	ICES Journal of Marine Science
29	3.5	Restoration Ecology
40	3.33	Biological Invasions
33	3.25	Marine Biology
45	3.2	Journal of Animal Ecology
0	3.2	Taxon
86	3.18	Trends in Ecology and Evolution
99	3.16	Nature Climate Change
0	3	African Journal of Ecology
0	3	Biodiversity
0	3	CatNews
0	3	Environmental Education Research
0	3	Human Ecology
49	3	Journal of Biogeography
0	3	Journal of Conchology
42	3	Journal of Sustainable Tourism
0	3	Journal of Threatened Taxa
26	3	Mammal Review
8	3	Ostrich
0	3	Revue Africaine de Droit de l'Environnement
44	2.9	Animal Behavior
26	2.33	Animal Conservation
93	2.11	Global Change Biology
0	2	American Journal of Primatology
0	2	Aquatic Botany
0	2	Australian Journal of Botany
55	2	Ecological Applications
53	2	Ecology and Society
32	2	Ecosystem Services
36	2	Environmental Impact Assessment Review
34	2	Environmental Management
0	2	Environmental Policy and Law
77	2	Global Environmental Change
0	2	Herpetological Journal
0	2	Insect Conservation and Diversity
19	2	International Forestry Review
0	2	IUCN Crocodile Specialist Group Newsletter
0	2	Journal of Insect Conservation
0	2	Journal of Tropical Ecology
0	2	Pachyderm
0	2	Pacific Science
0	2	Scientific American
0	2	Society and Natural Resources
72	2	World Development
37	1.75	Coral Reefs
24	1.58	Endangered Species Research
27	1.5	Biotropica
44	1.5	Diversity and Distributions
0	1.5	Wildlife Research
0	1.33	Aquatic Conservation
0	1.33	Conservation
24	1.33	Journal of Environmental Planning and Management
22	1.3	Journal of Avian Biology
0	1.25	Journal of Cetacean Research and Management
91	1.2	Ecology Letters
0	1.2	Herpetologica
0	1.16	BioScience
19	1.14	Condor
0	1	Academy of Environmental Law
0	1	Adansonia
0	1	African Primates
56	1	Agriculture, Ecosystems, and Environment
0	1	Ambio
20	1	American Anthropologist
25	1	American Journal of International Law
0	1	Aquatic Biology
24	1	Auk
31	1	Biological Journal of the Linnean Society
0	1	Canadian Journal of Zoology
0	1	Climate Law
69	1	Climatic Change
0	1	Conservation Biology of Freshwater Turtles and Tortoises
0	1	Cultural Geographies
0	1	Cybium
43	1	Deep Sea Research II
0	1	Ecotoxicology
0	1	Endangered Species Bulletin
65	1	Energy Economics
0	1	Enviromental Biology of Fishes
0	1	Environmental Conservation
0	1	Environmental Ethics
0	1	European Journal of Wildlife Research
55	1	Evolution
35	1	Fisheries Research
0	1	Forktail
30	1	Fungal Ecology
0	1	Giraffa
58	1	Global Ecology and Biogeography
0	1	Global Environmental Change: Human and Policy Dimensions
0	1	Herpetological Conservation and Biology
0	1	Human Organization
41	1	Hydrobiologia
30	1	Hyrdogeology Journal
0	1	ICF Bugle
19	1	International Environmental Agreements: Politics, Law and Economics
0	1	International Journal of Biodiversity Science, Ecosystem Services, and Management
0	1	International Journal of Cultural Property
0	1	International Journal of Ecology
0	1	International Journal of Environmental and Science Education
0	1	International Journal of Forestry Research
0	1	International Journal of Social Ecology and Sustainable Development
0	1	International Journal of Wilderness
0	1	IUCN Crocodile Specialist Group Proceedings
0	1	IUCN Otter Specialist Group Bulletin
0	1	Journal of Biodiversity and Endangered Species
0	1	Journal of Education for Sustainable Development
46	1	Journal of Environmental Economics and Management
0	1	Journal of Environmental Education
0	1	Journal of Environmental Health
38	1	Journal of Experimental Marine Biology and Ecology
0	1	Journal of Forest Management
0	1	Journal of Human Rights and the Environment
64	1	Journal of Hydrology
0	1	Journal of Ichthyology
0	1	Journal of Leisure Research
0	1	Journal of Marine and Coastal Law
0	1	Journal of Natural Resources Law
28	1	Journal of Ornithology
0	1	Journal of the Bombay Natural History Society
0	1	Journal of Wilderness Management
0	1	Journal of Zoo and Wildlife Medicine
0	1	Kew Bulletin
0	1	Kirkia
46	1	Land Use Policy
47	1	Natural Hazards
11	1	Natures Sciences Sociétés
0	1	Neotropical Primates
82	1	New Phytologist
0	1	New Scientist
0	1	Northwestern Naturalist
0	1	Nova Hedwigia
0	1	Occasional Papers of the IUCN Species Survival Commission
44	1	Oecologia
85	1	Philosophical Transactions of the Royal Society B
17	1	Revista de Biologia Tropical
0	1	Revista de Direito Ambiental
0	1	Revue Juridique de l'Environnement
0	1	Sandgrouse
0	1	South African Journal of Wildlife Research
0	1	Subterranean Biology
0	1	Swara
0	1	Systematic Botany
259	1	The Lancet
0	1	The Lichenologist
0	1	Urban Ecosystems
0	1	Ursus
13	1	Waterbirds
0	1	Wetlands Ecology and Management
13	1	Wilson Journal of Ornithology
0	1	Zoological Record
0	0.7	International Zoo Year Book
0	0.5	Australian Journal of Outdoor Education
38	0.5	Biology and Fertility of Soils
0	0.5	Birds of North America
0	0.5	Canadian Journal of Outdoor Education
0	0.5	Ecological Management & Restoration
0	0.5	El Hornero
121	0.5	Environmental Science and Technology
0	0.5	European Journal of Phycology
45	0.5	Fish and Fisheries
0	0.5	Ichthyological Journal
0	0.5	International Journal of Environment and Sustainable Development
0	0.5	International Journal of Sustainable Development
0	0.5	Journal of Arid Environments
0	0.5	Journal of Phycology
36	0.5	Journal of Vegetation Science
0	0.5	Ornitologia Neotropical
0	0.5	Science et Avenir
0	0.5	Science et Vie
62	0.5	Soil Biology and Biochemistry
0	0.5	WAZA Magazine
0	0.5	WAZA News
49	0.4	Molecular Phylogenetics and Evolution
0	0.33	Acta Botanica Gallica
0	0.33	Conservation and Society
0	0.33	Environmental Management, Policy, and Planning
0	0.33	Mediterranean Marine Science
0	0.33	Plant Biosystems
0	0.33	Plant Sociology
0	0.33	The Economist
0	0.25	Aquatic Mammals
0	0.25	Coastal Zone Management Journal
0	0.25	Dodo
0	0.25	Folia Primatologica
78	0.25	Management Science
0	0.25	Methods in Ecology and Evolution
0	0.25	Primates
0	0.2	Bocconea
0	0.2	Flora Mediterranea
0	0.2	Journal of Biology
0	0.2	Journal of European Orchids
0	0.2	Phylotaxa
0	0.2	Systematics and Biodiversity
0	0.2	Webbia
0	0.16	Frontiers in Ecology and Environment
11	0.14	Journal of Raptor Research
56	0.11	Forest Ecology and Management
